# Supplementary material
Source: bioRxiv or medRxiv preprint supplement (http://biorxiv.org/highwire/filestream/19351/field_highwire_adjunct_files/2/070037-3.pdf)
Supplement: Supplementary file [file 070037-3.pdf]

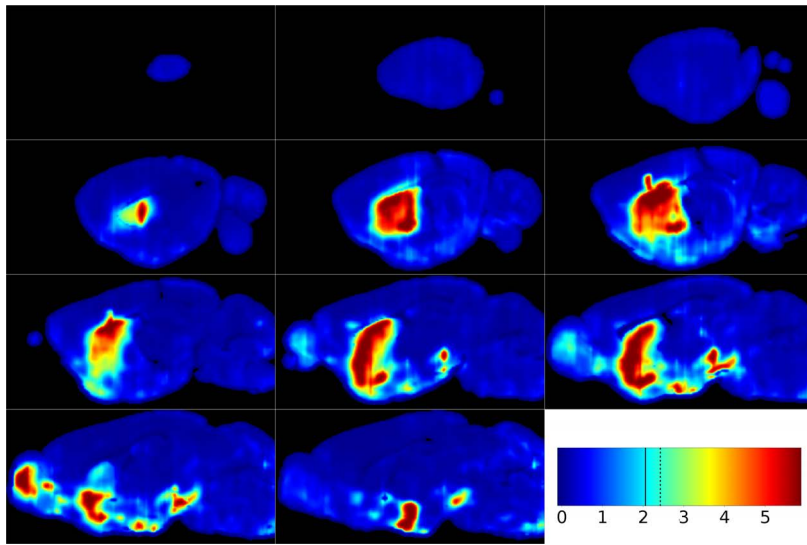

A

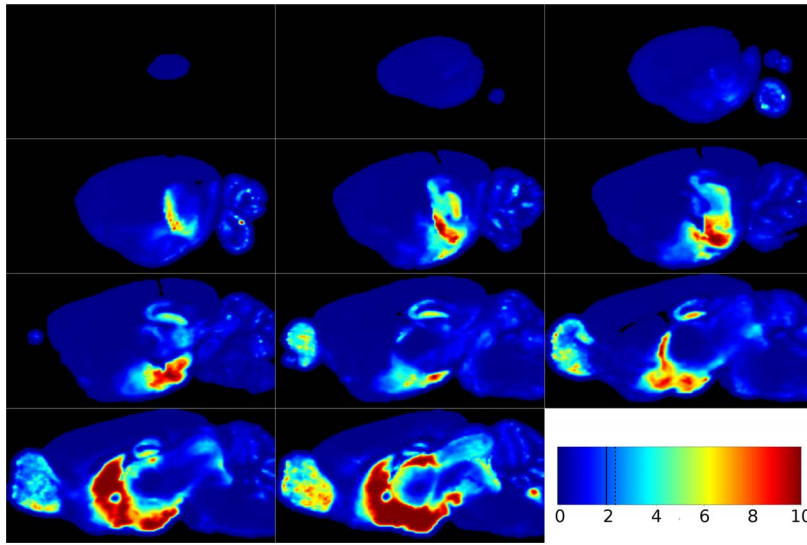

B

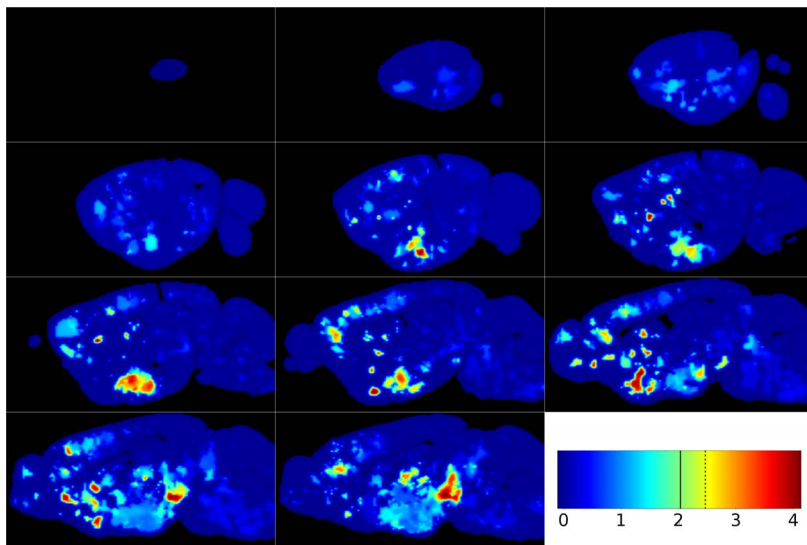

C

0 -log10(pvalue) 10

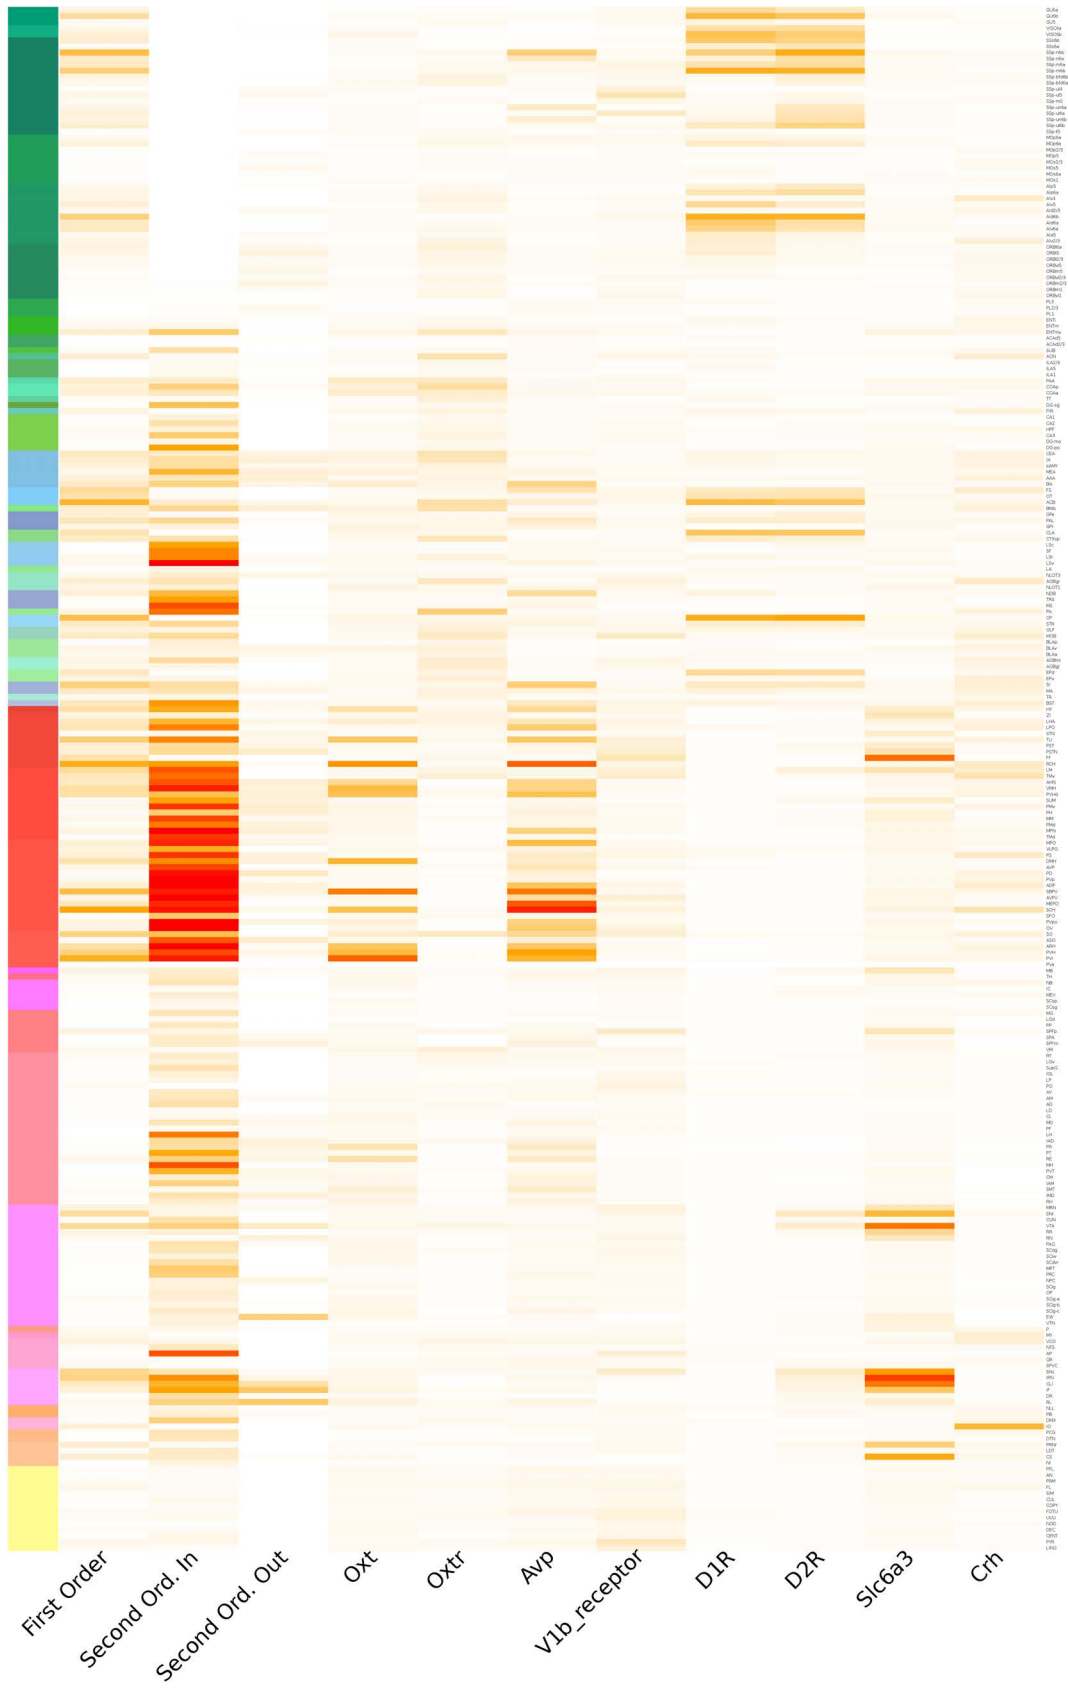

D

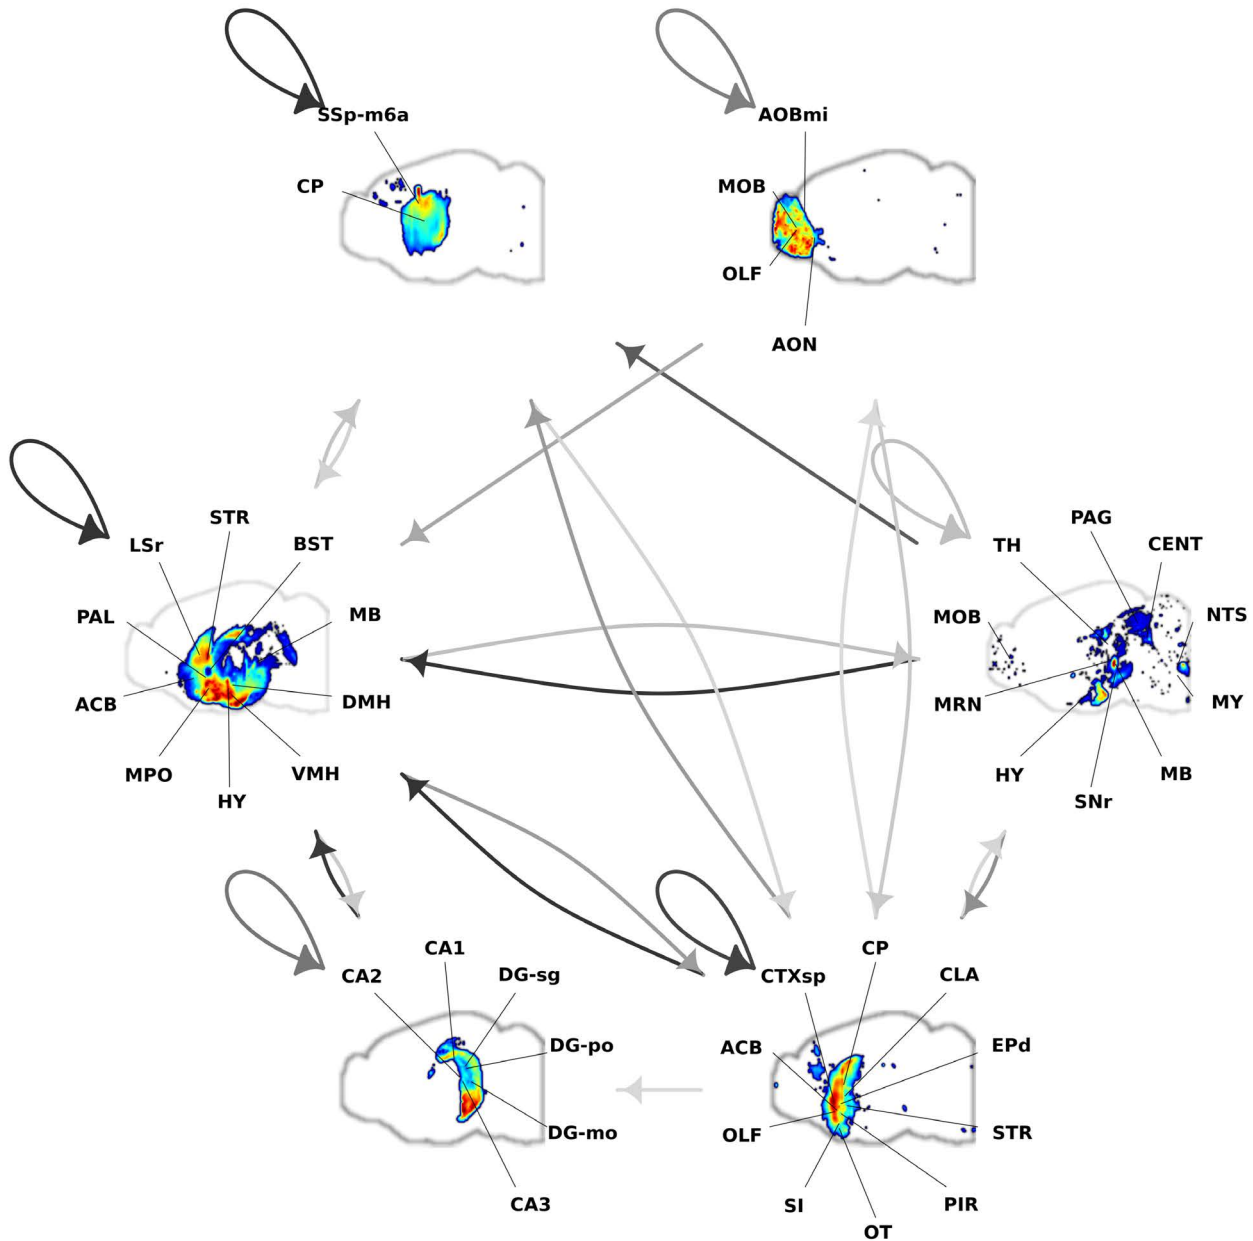

E

**Supplementary Data 3 Case 1. Social bonds gene-set from literature research.** (A) Slice-view of first order network measures given as  $-\log_{10}$  scaled p-values. (B) Slice-view of second order network measures (incoming node strength) given as  $-\log_{10}$  scaled p-values. (C) Slice-view of second order network measures (outgoing node strength) given as  $-\log_{10}$  scaled p-values. (D) Heatmap of average log-scaled p-values of first and second order effects as well as single gene effects. (E) Clustered network graph. Clusters of significant brain regions (FDR=0.05) with similar connectivity and their structural connectivity (normalized by the injection volume) given as grey-scale arrows.

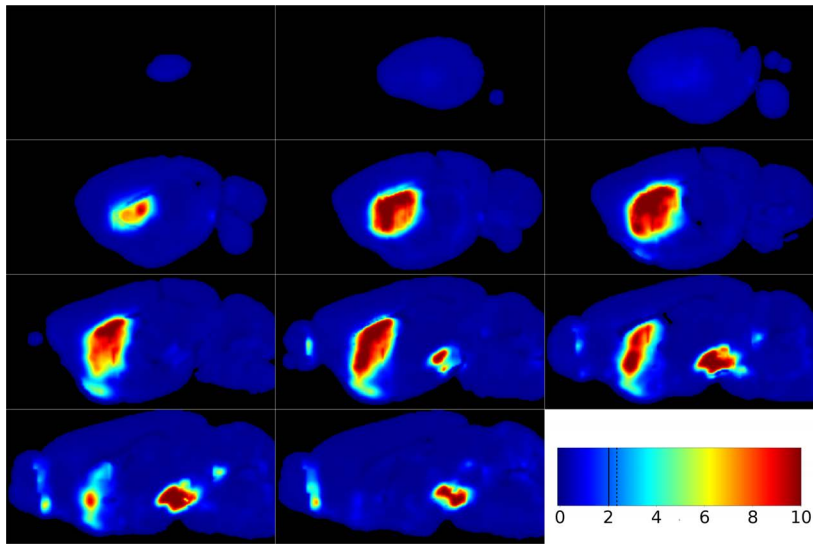

A

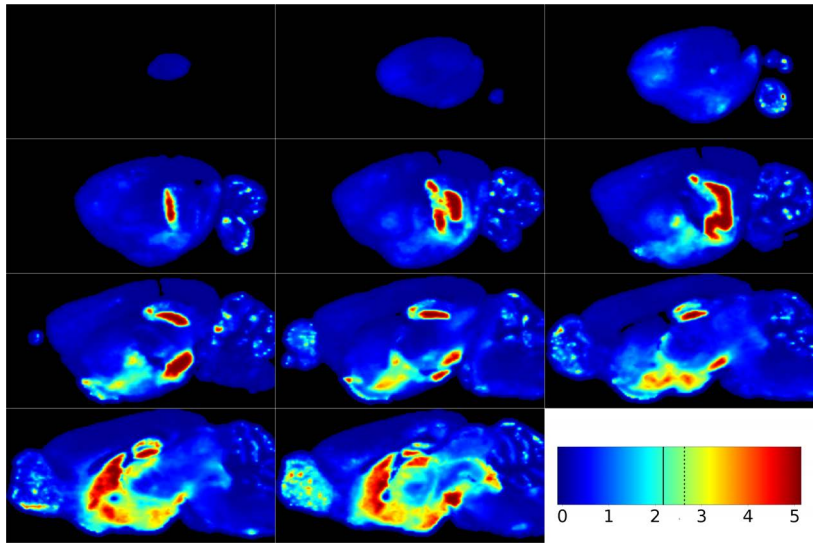

B

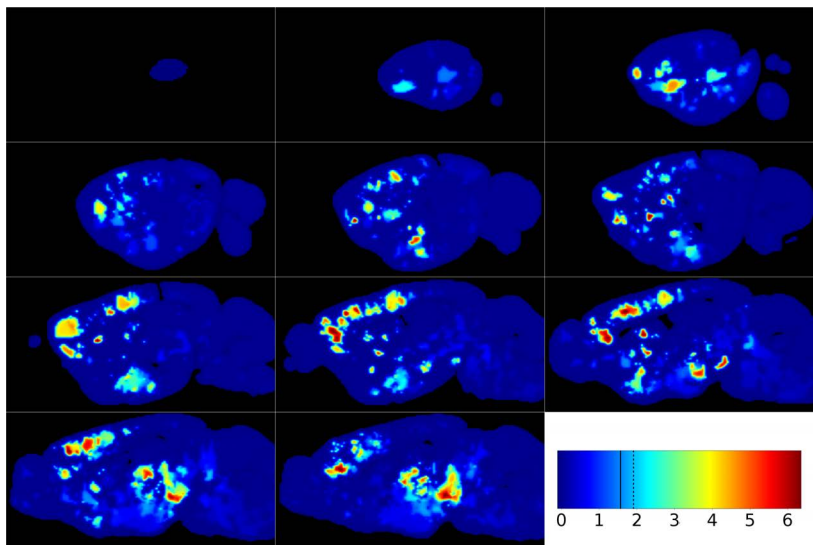

C



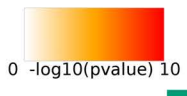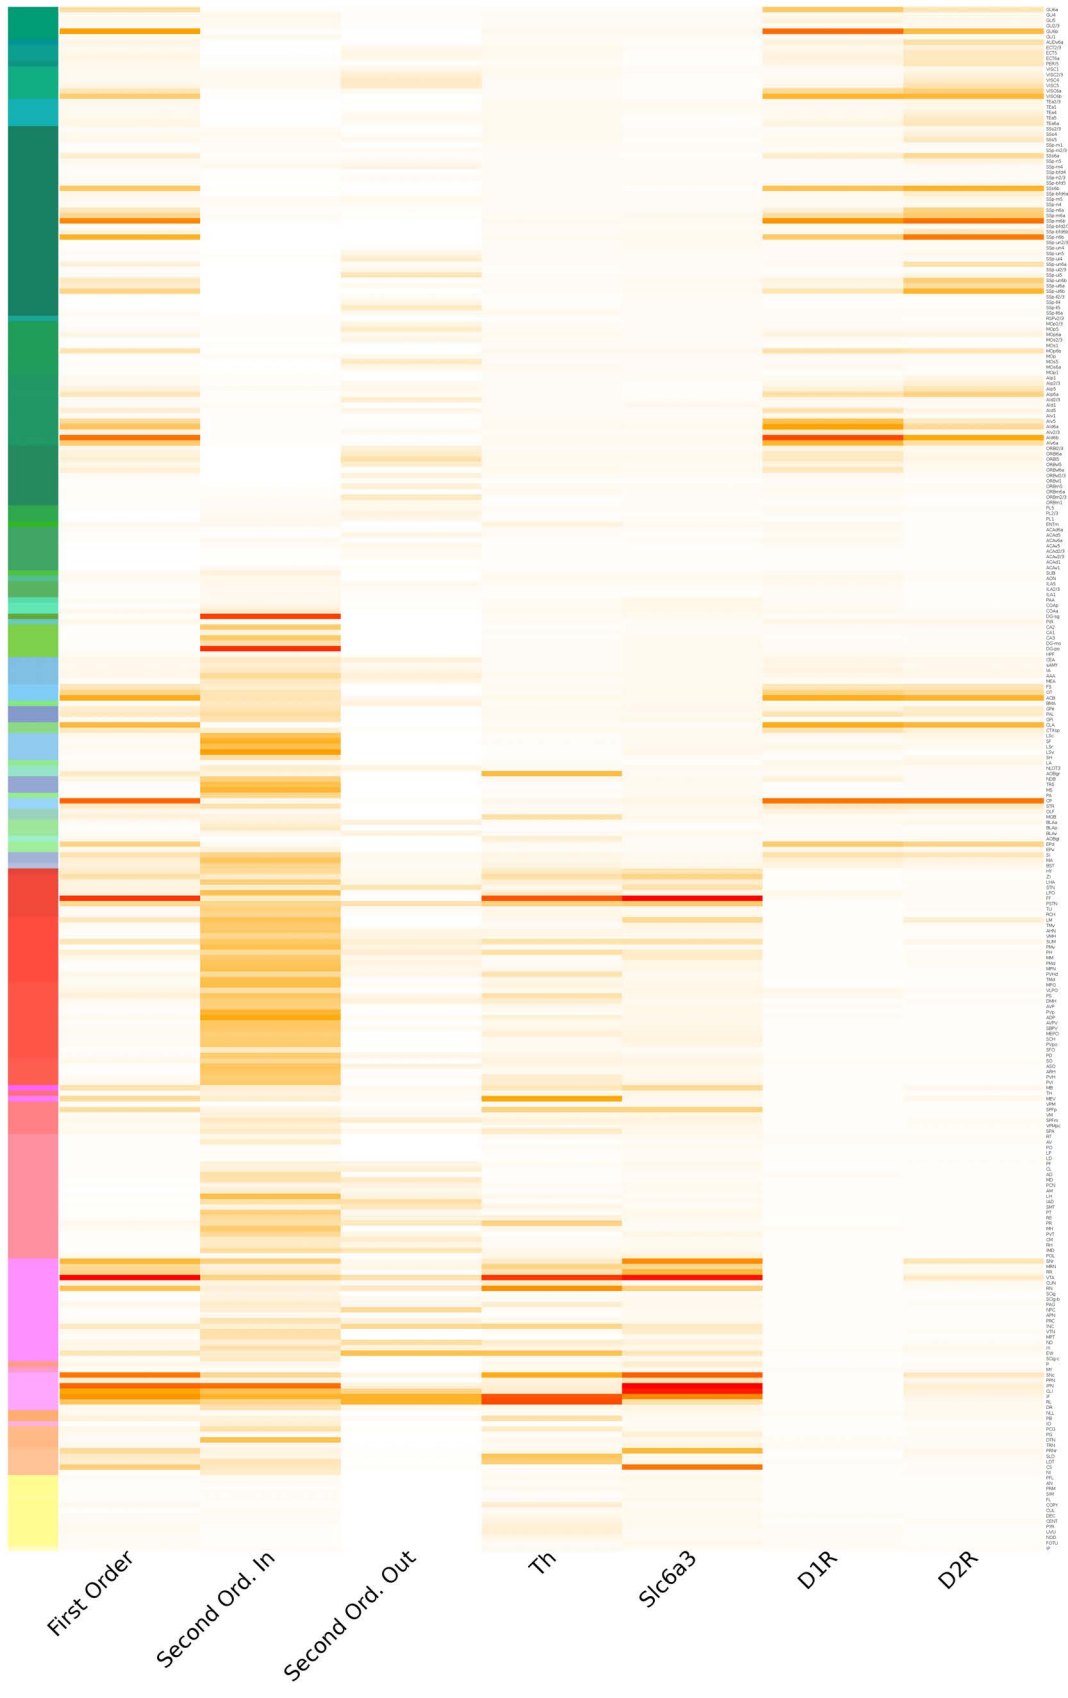

D

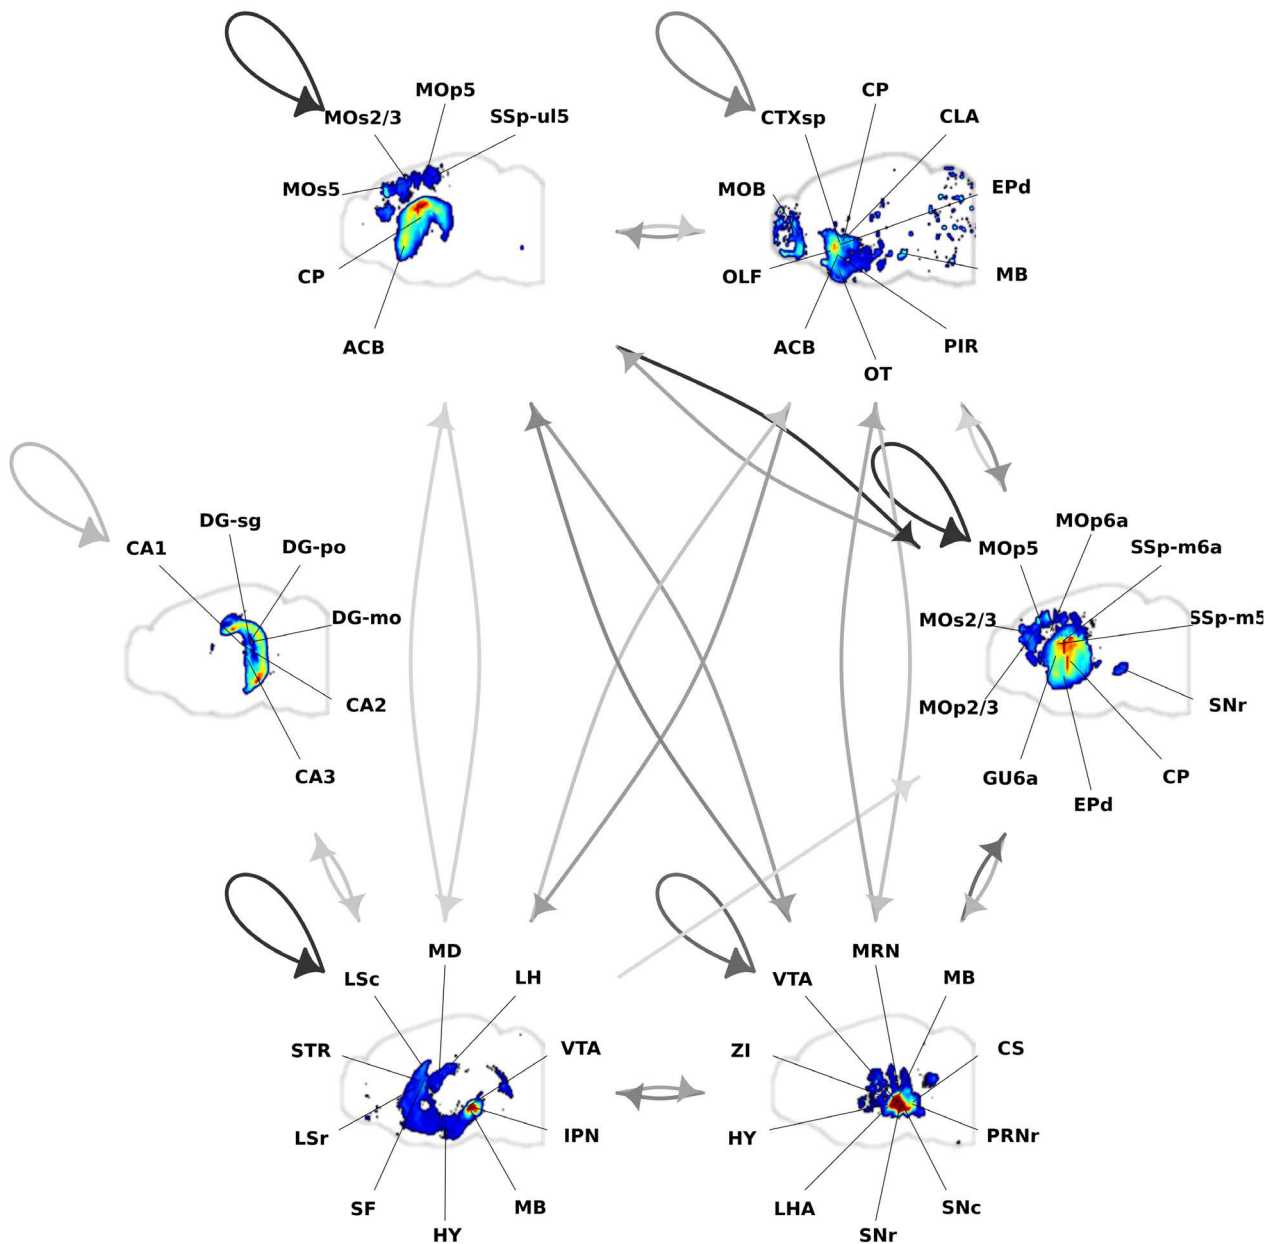

E

**Supplementary Data 3 Case 2. Dopaminergic system gene-set from literature research.** (A) Slice-view of first order network measures given as  $-\log_{10}$  scaled p-values. (B) Slice-view of second order network measures (incoming node strength) given as  $-\log_{10}$  scaled p-values. (C) Slice-view of second order network measures (outgoing node strength) given as  $-\log_{10}$  scaled p-values. (D) Heatmap of average log-scaled p-values of first and second order effects as well as single gene effects. (E) Clustered network graph. Clusters of significant brain regions (FDR=0.05) with similar connectivity and their structural connectivity (normalized by the injection volume) given as grey-scale arrows.

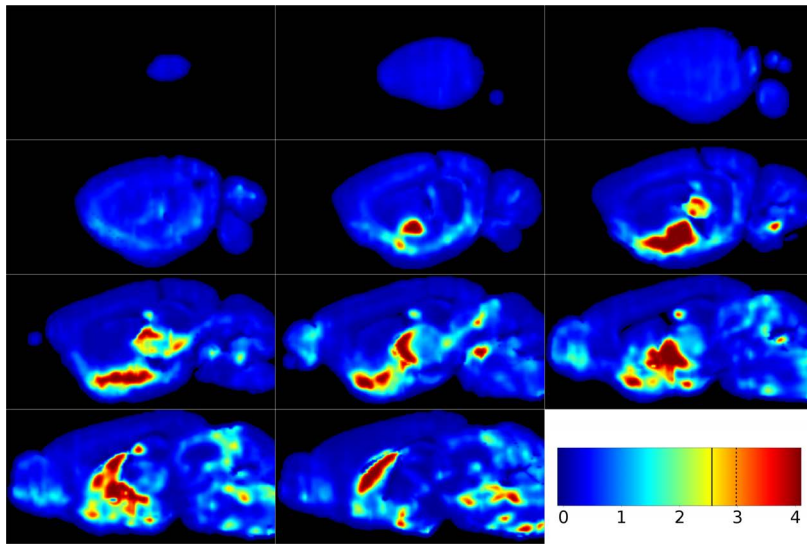

A

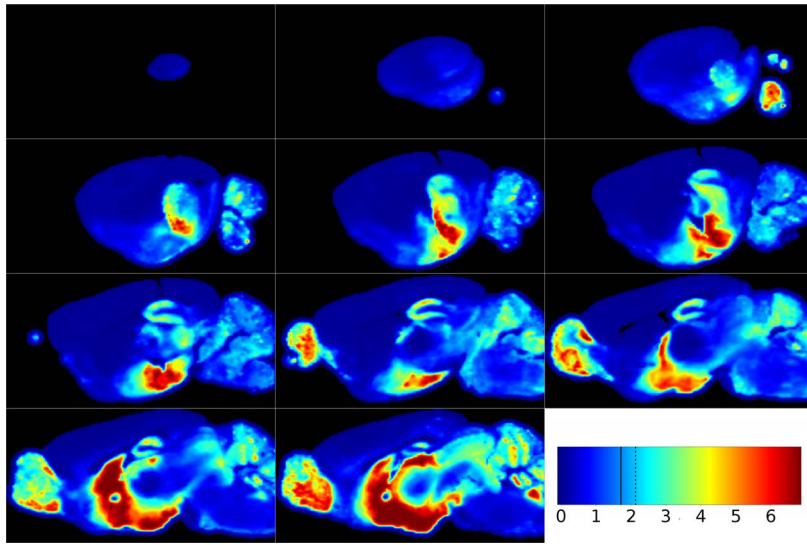

B

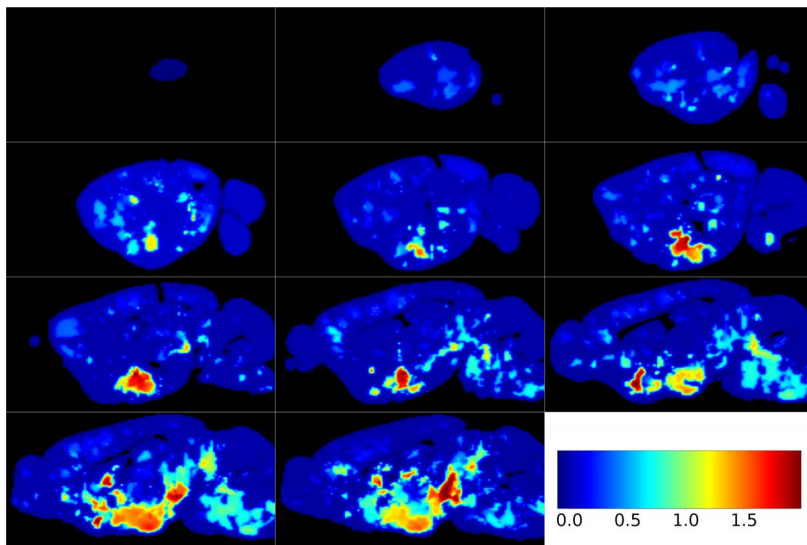

C

0 -log<sub>10</sub>(pvalue) 10

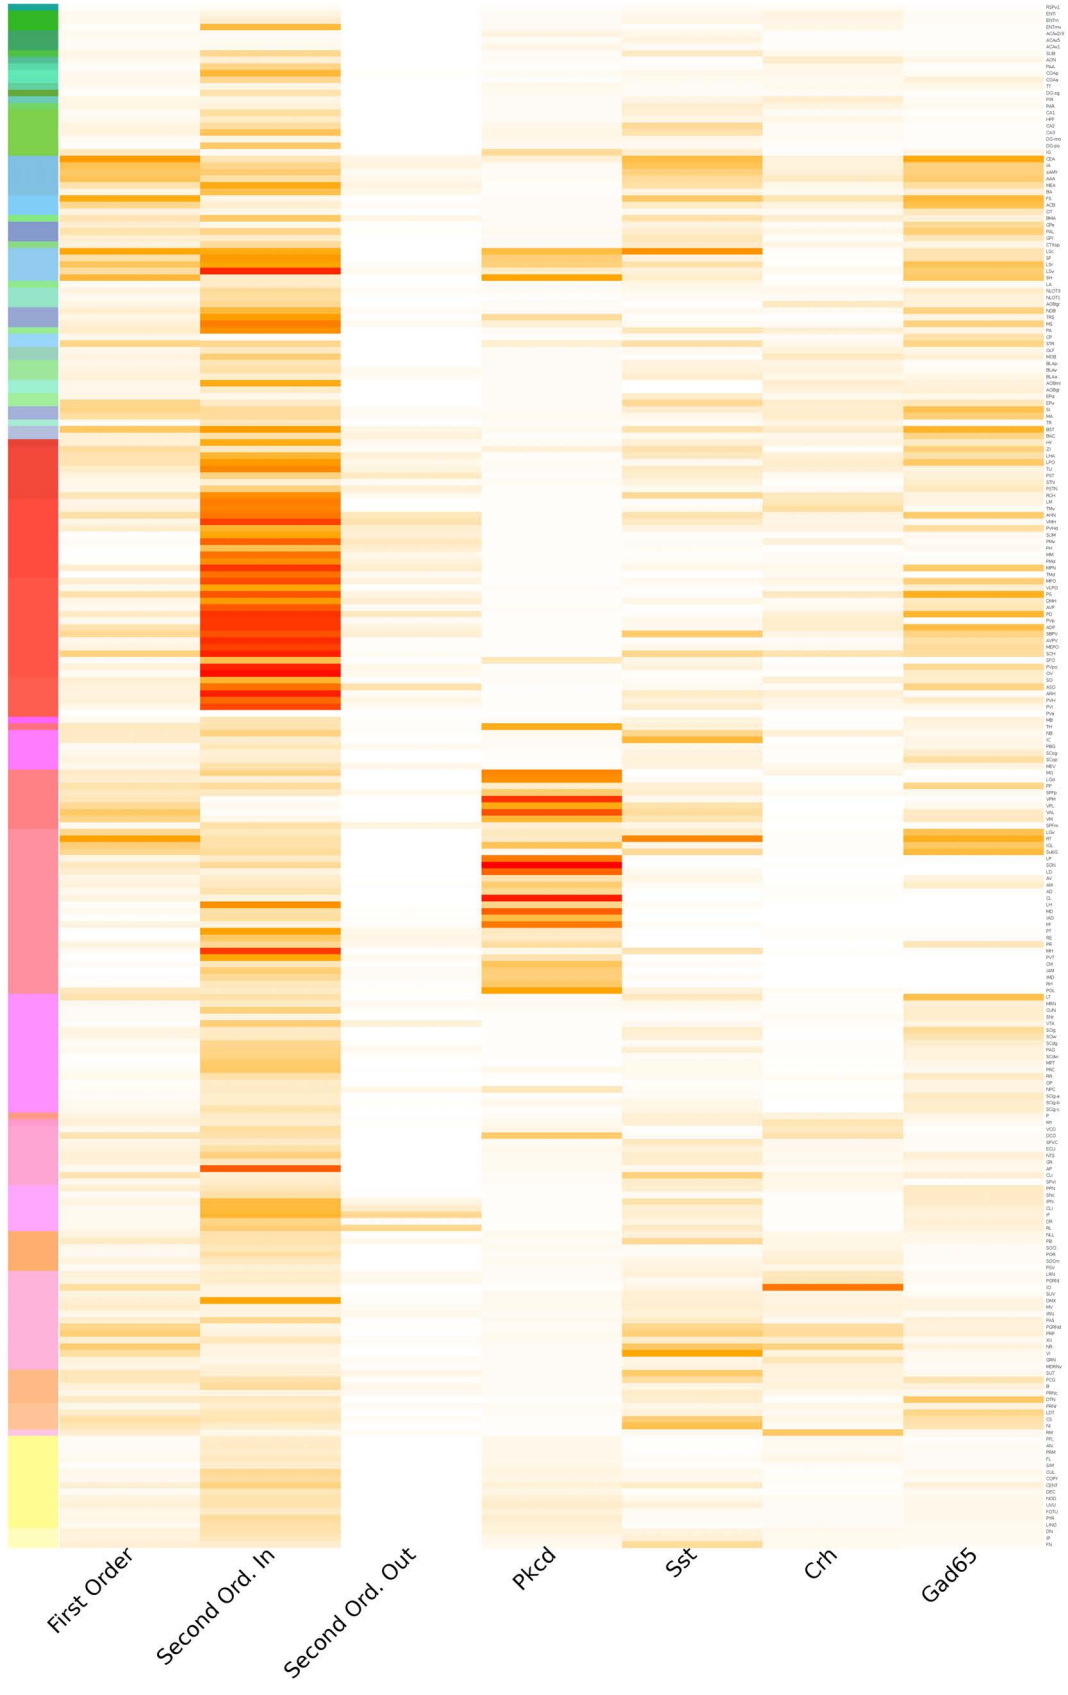

D

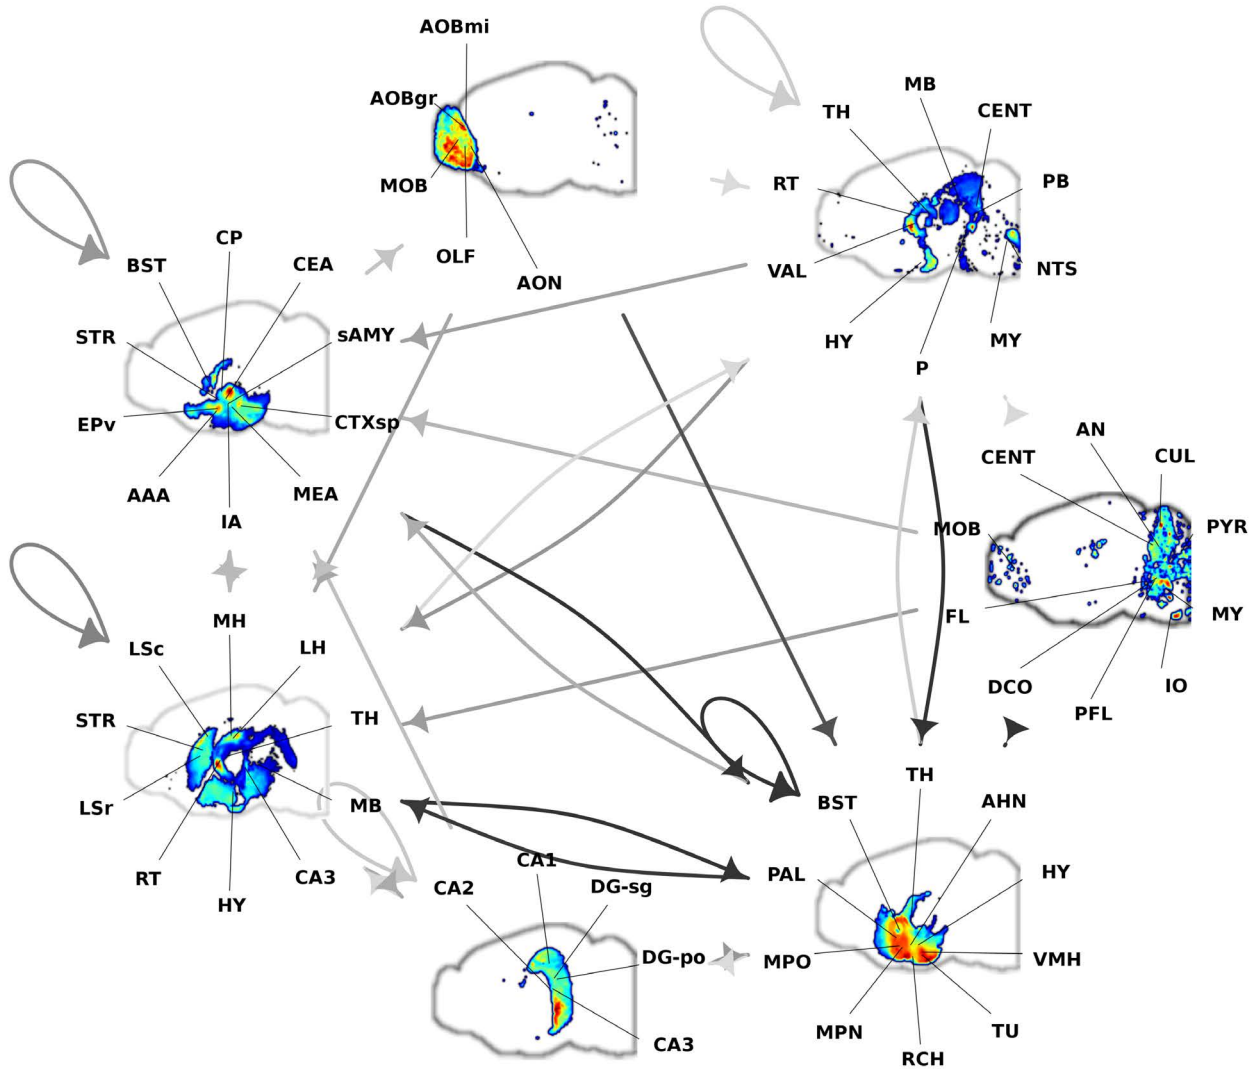

E

**Supplementary Data 3 Case 3. Central Amygdala Microcircuitry gene-set from literature research.** (A) Slice-view of first order network measures given as  $-\log_{10}$  scaled p-values. (B) Slice-view of second order network measures (incoming node strength) given as  $-\log_{10}$  scaled p-values. (C) Slice-view of second order network measures (outgoing node strength) given as  $-\log_{10}$  scaled p-values. (D) Heatmap of average log-scaled p-values of first and second order effects as well as single gene effects. (E) Clustered network graph. Clusters of significant brain regions (FDR=0.05) with similar connectivity and their structural connectivity (normalized by the injection volume) given as grey-scale arrows.



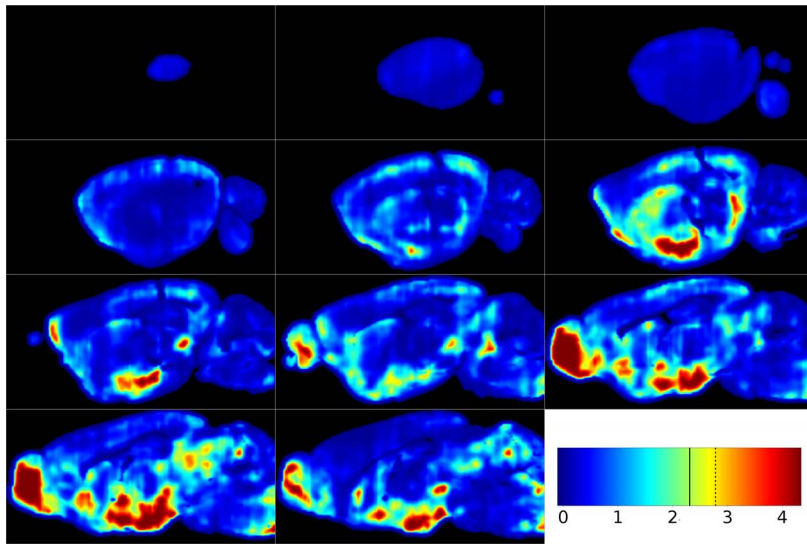

A

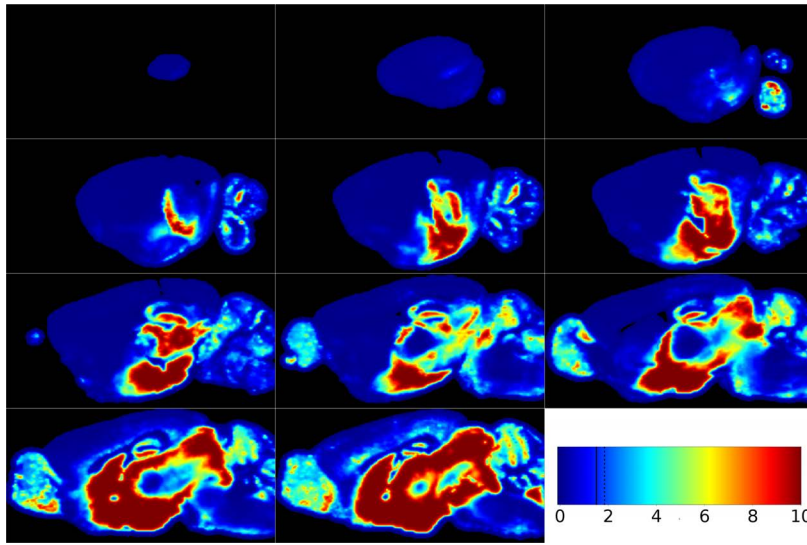

B

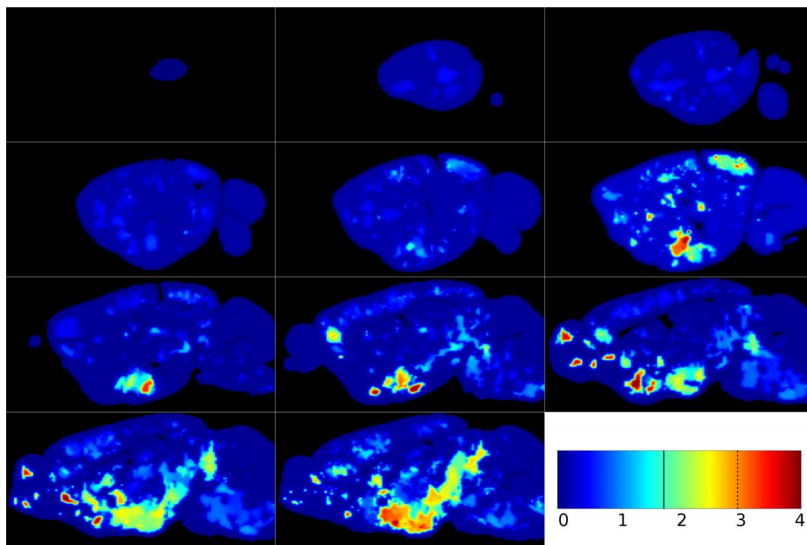

C

0 -log10(pvalue) 10

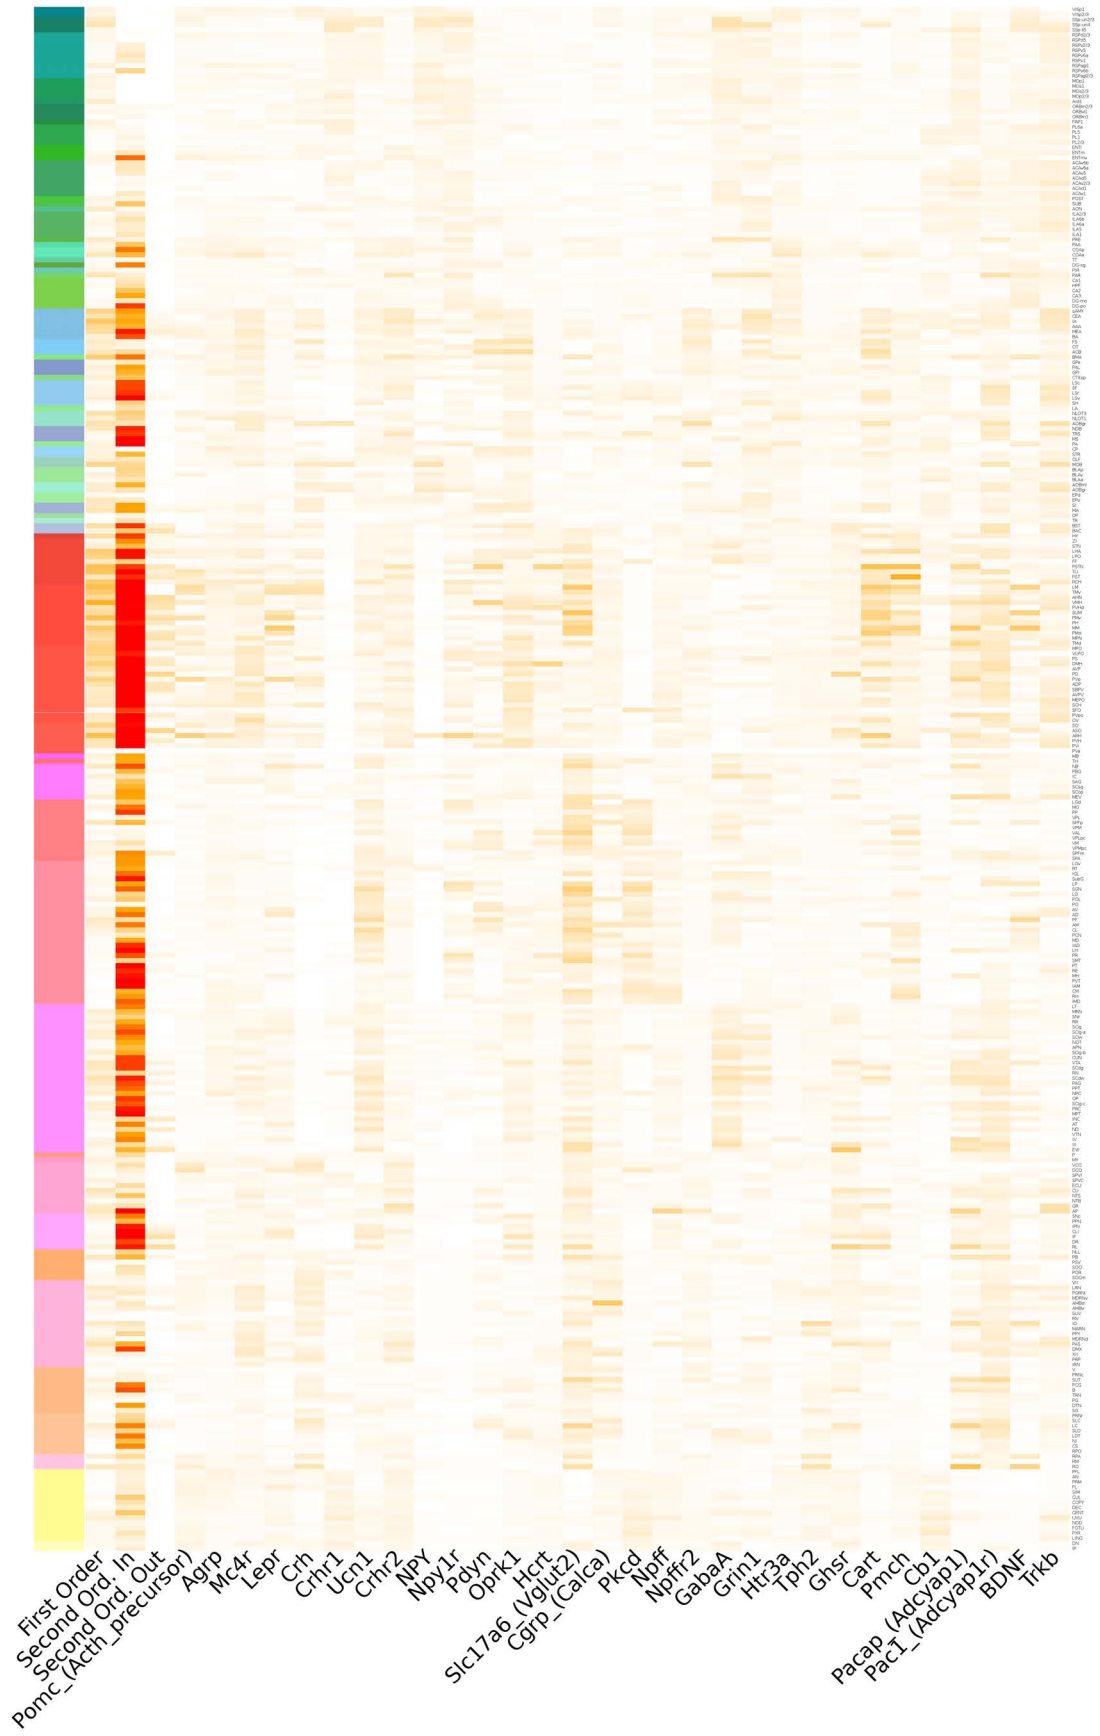

D

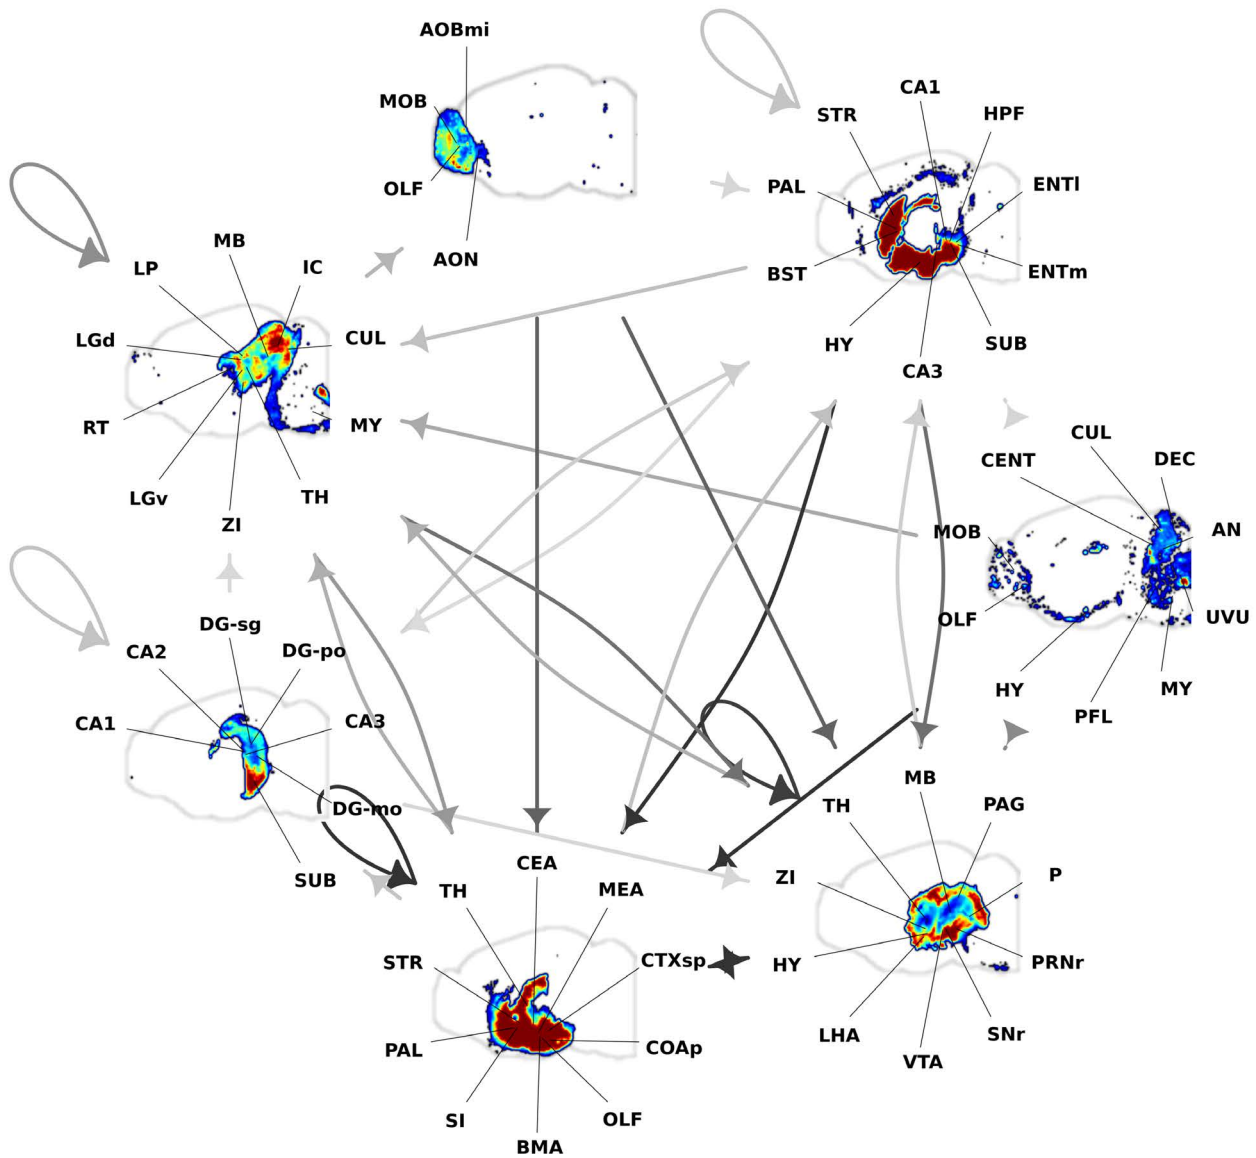

E

**Supplementary Data 3 Case 4. Feeding gene-set from literature research.** (A) Slice-view of first order network measures given as  $-\log_{10}$  scaled p-values. (B) Slice-view of second order network measures (incoming node strength) given as  $-\log_{10}$  scaled p-values. (C) Slice-view of second order network measures (outgoing node strength) given as  $-\log_{10}$  scaled p-values. (D) Heatmap of average log-scaled p-values of first and second order effects as well as single gene effects. (E) Clustered network graph. Clusters of significant brain regions (FDR=0.05) with similar connectivity and their structural connectivity (normalized by the injection volume) given as grey-scale arrows.

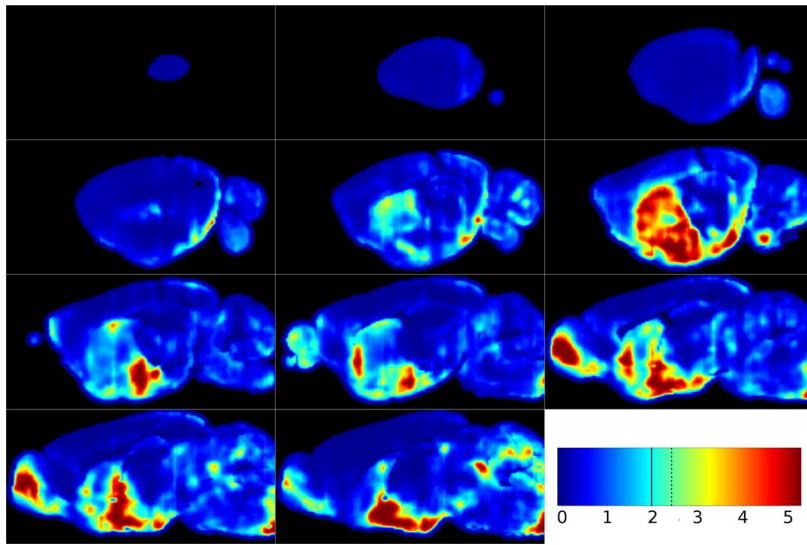

A

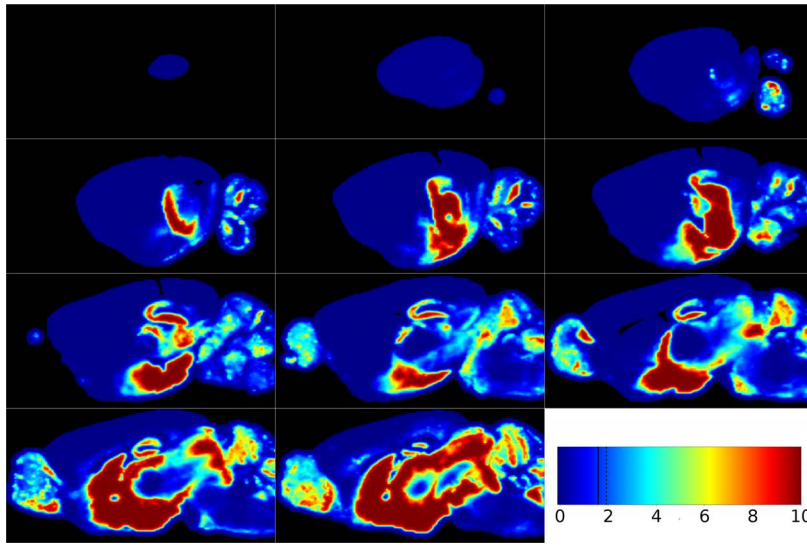

B

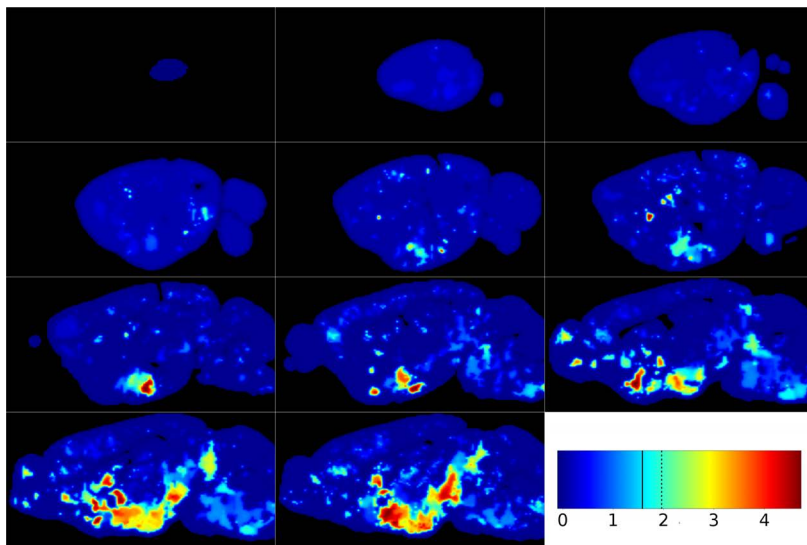

C



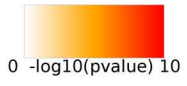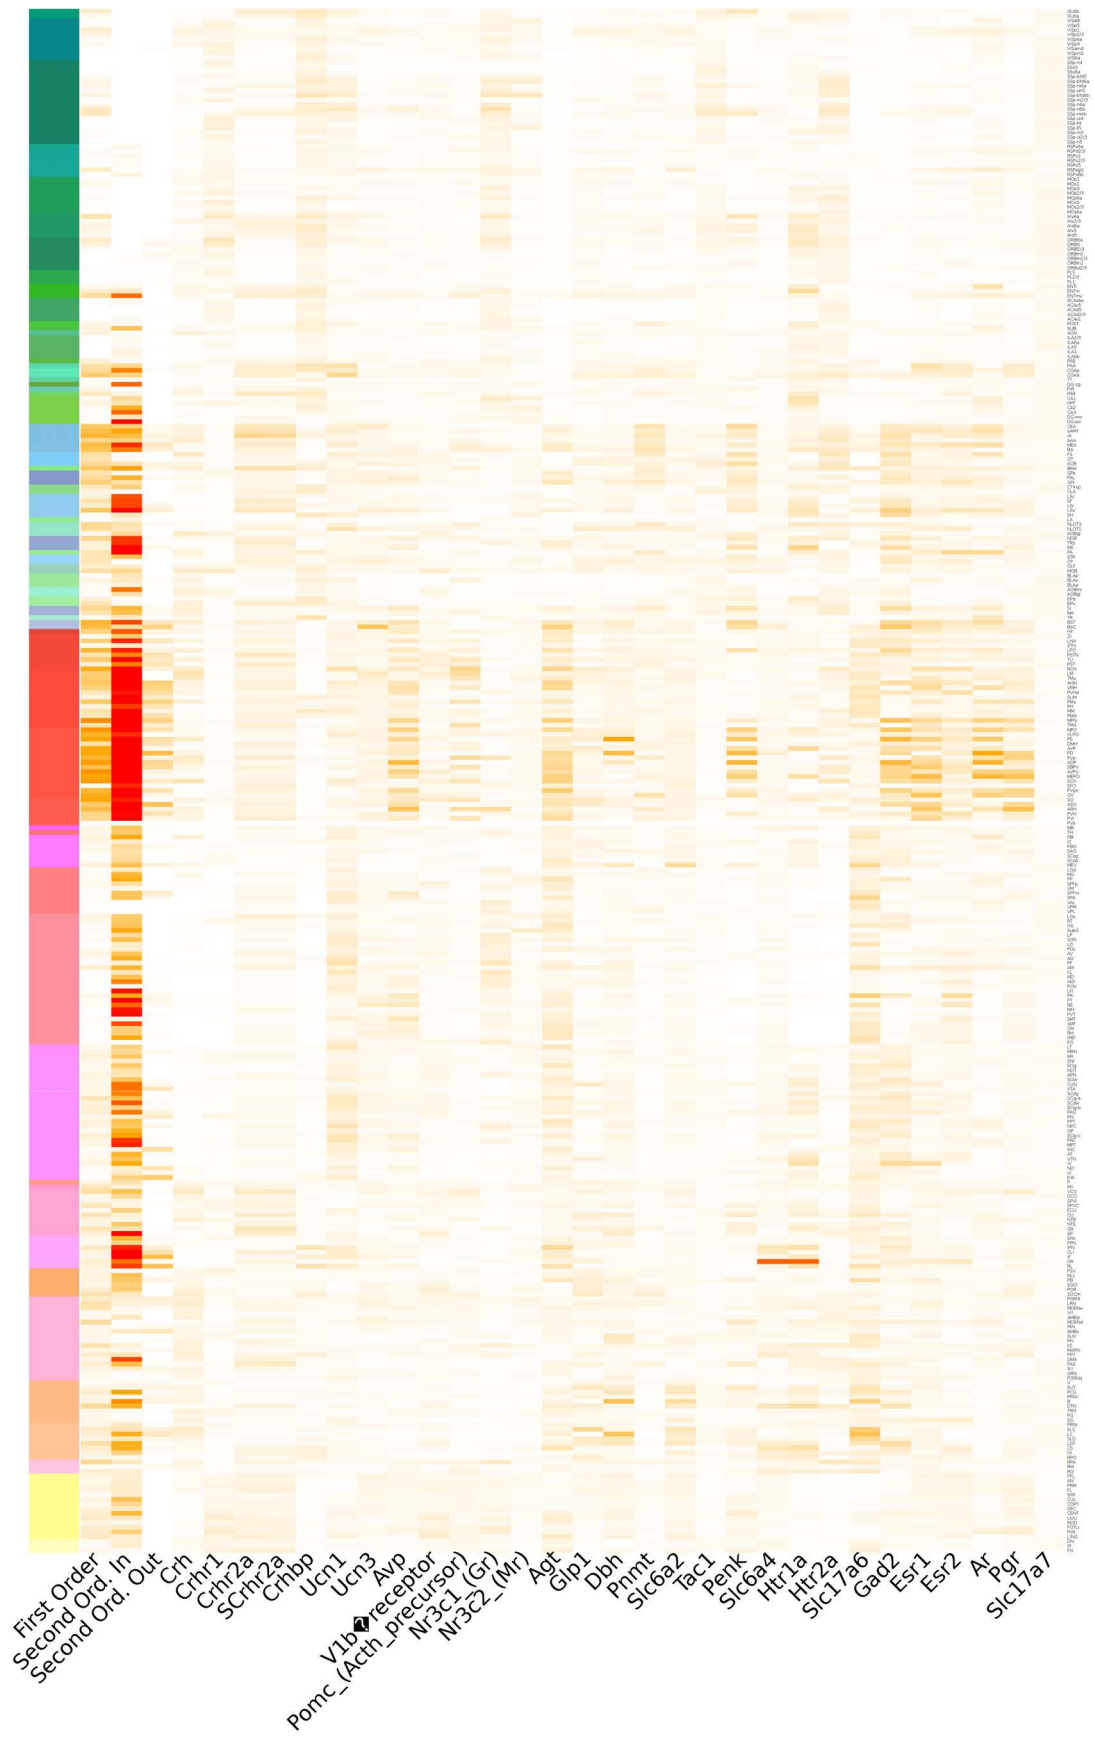

D



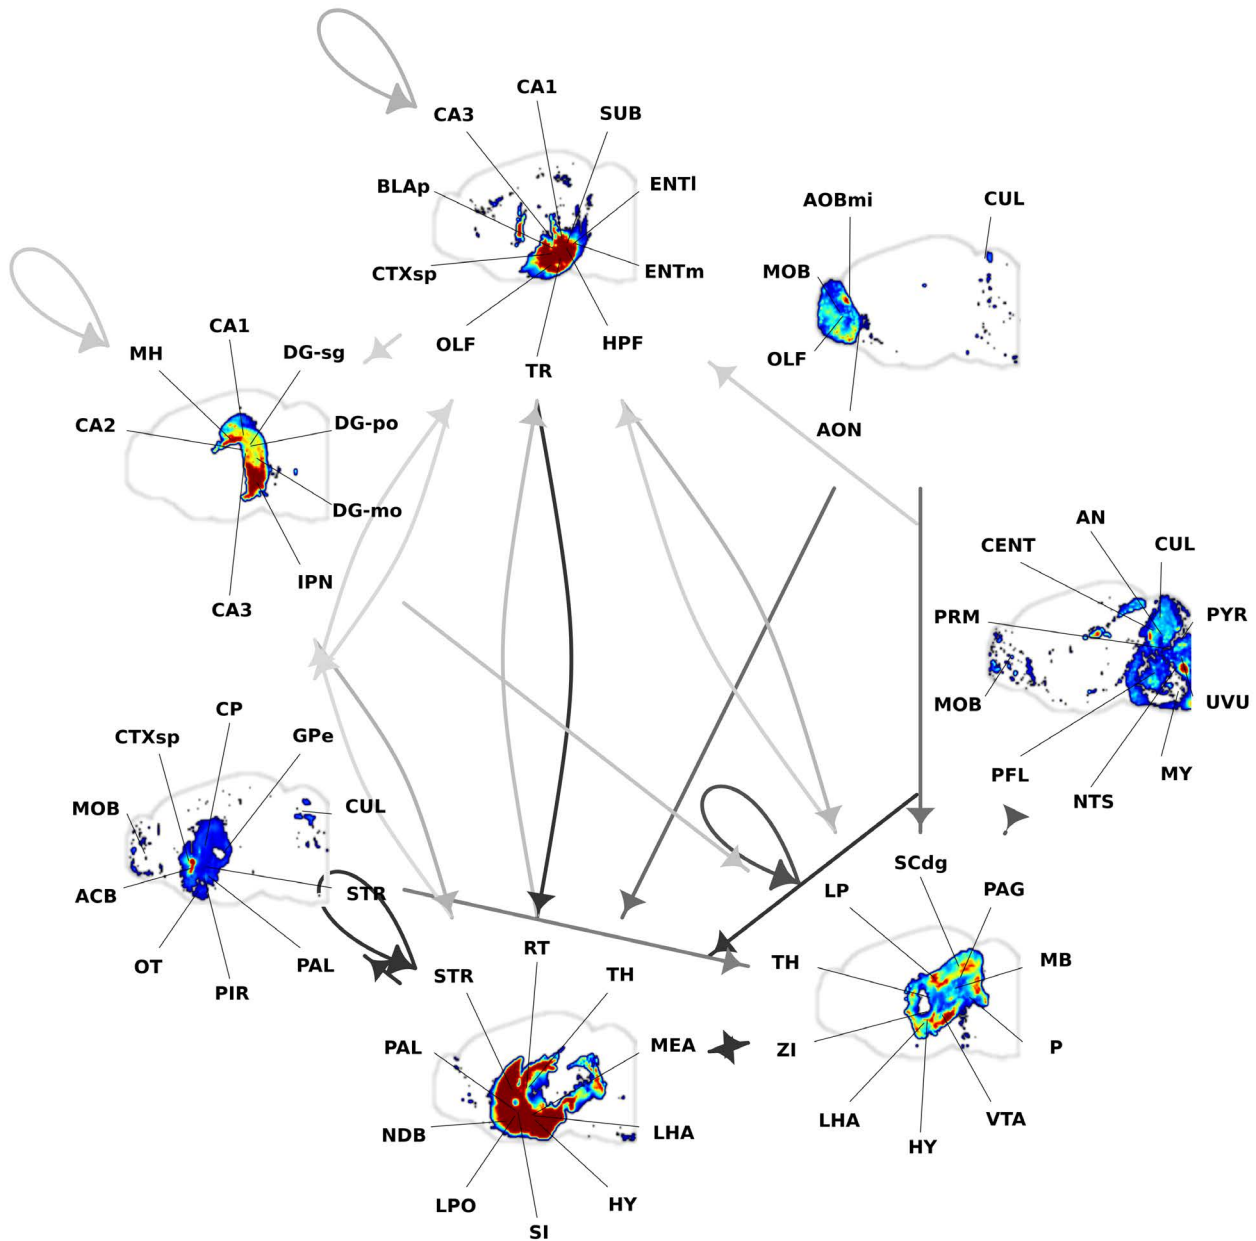

E

**Supplementary Data 3 Case 5. HPA Axis Central Control gene-set from literature research.** (A) Slice-view of first order network measures given as  $-\log_{10}$  scaled p-values. (B) Slice-view of second order network measures (incoming node strength) given as  $-\log_{10}$  scaled p-values. (C) Slice-view of second order network measures (outgoing node strength) given as  $-\log_{10}$  scaled p-values. (D) Heatmap of average log-scaled p-values of first and second order effects as well as single gene effects. (E) Clustered network graph. Clusters of significant brain regions (FDR=0.05) with similar connectivity and their structural connectivity (normalized by the injection volume) given as grey-scale arrows.

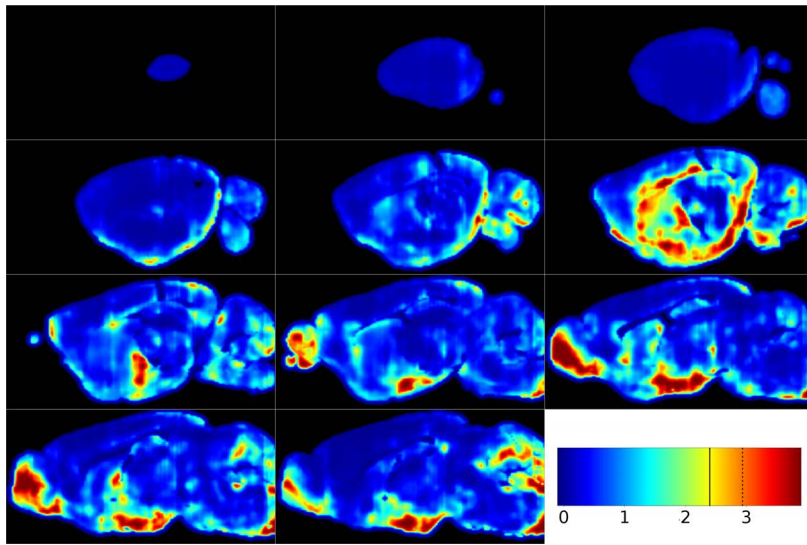

A

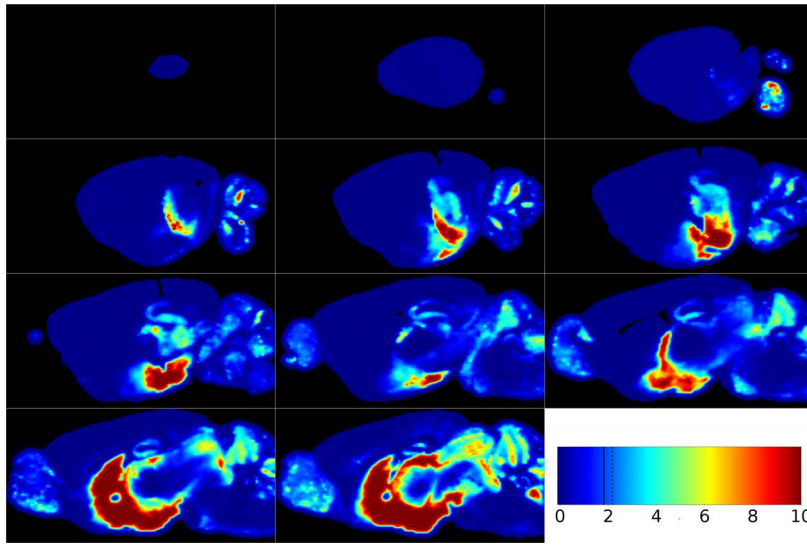

B

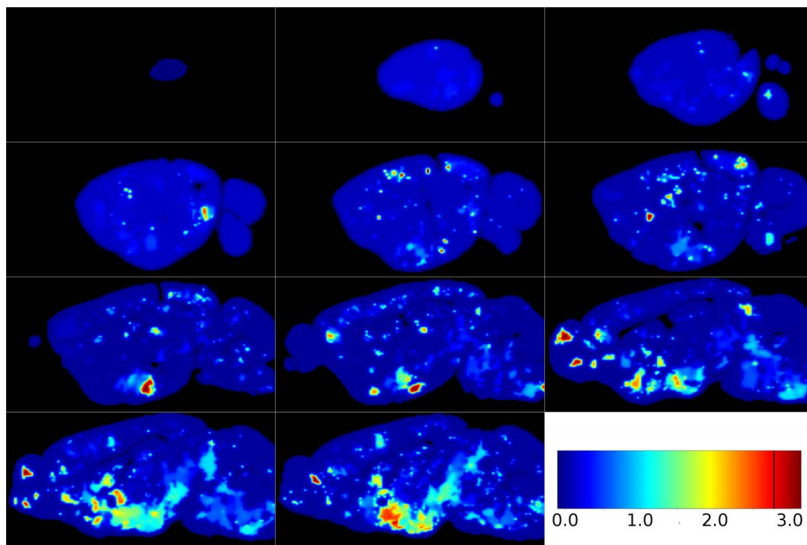

C

0 -log10(pvalue) 10

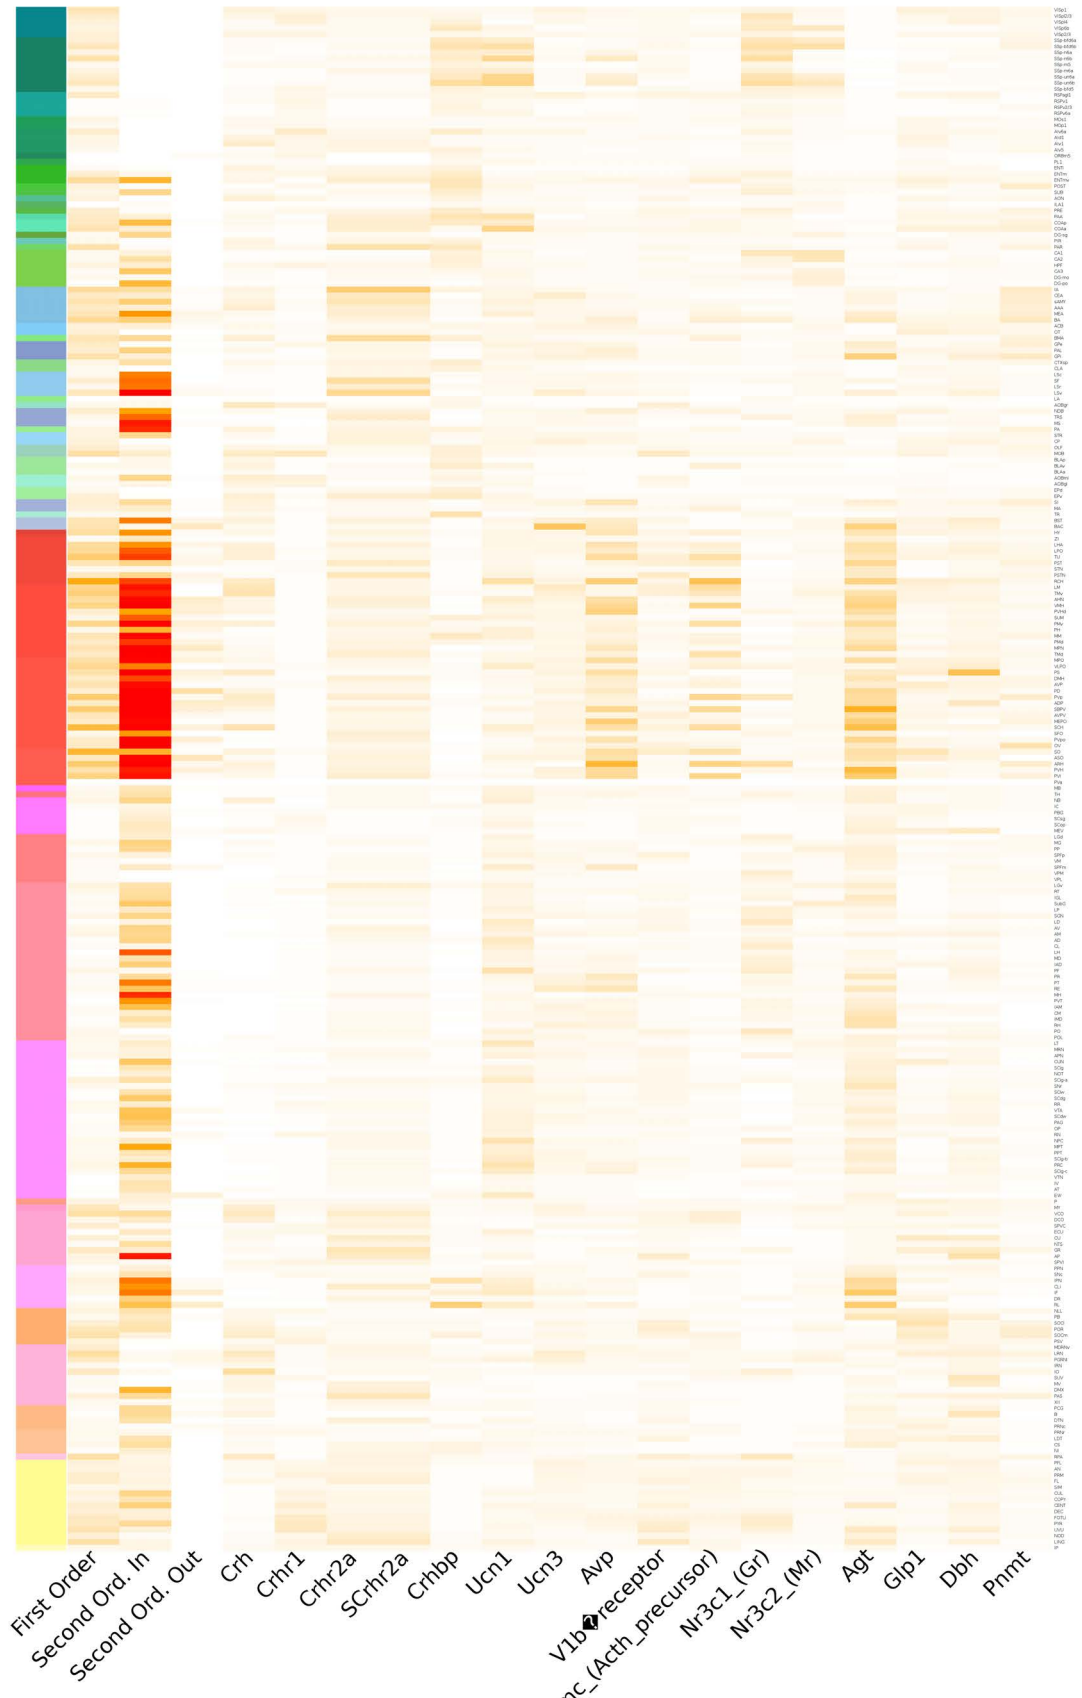

D

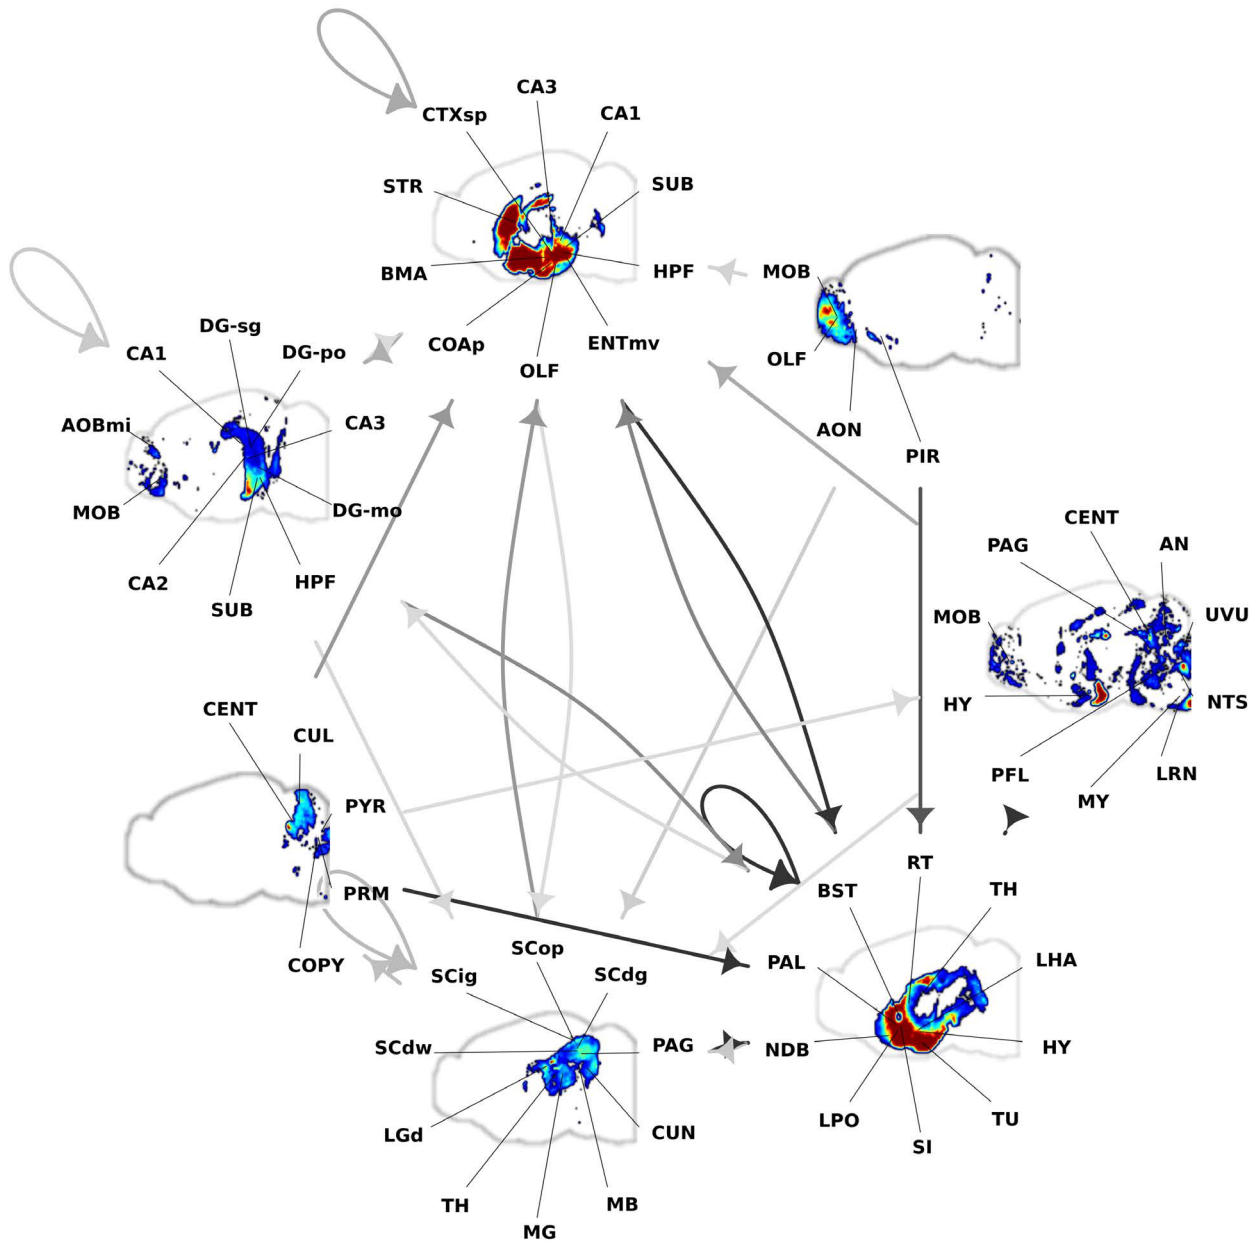

E

**Supplementary Data 3 Case 6. HPA Axis regulation gene-set from literature research.** (A) Slice-view of first order network measures given as  $-\log_{10}$  scaled p-values. (B) Slice-view of second order network measures (incoming node strength) given as  $-\log_{10}$  scaled p-values. (C) Slice-view of second order network measures (outgoing node strength) given as  $-\log_{10}$  scaled p-values. (D) Heatmap of average log-scaled p-values of first and second order effects as well as single gene effects. (E) Clustered network graph. Clusters of significant brain regions (FDR=0.05) with similar connectivity and their structural connectivity (normalized by the injection volume) given as grey-scale arrows.

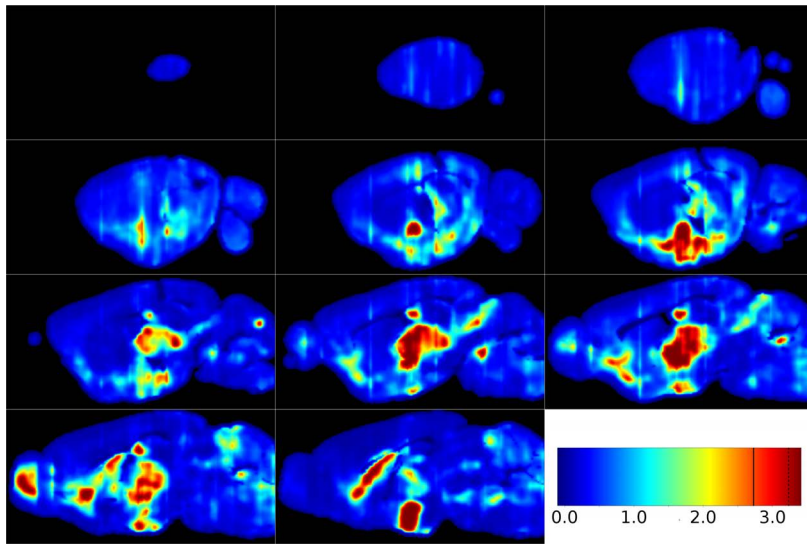

A

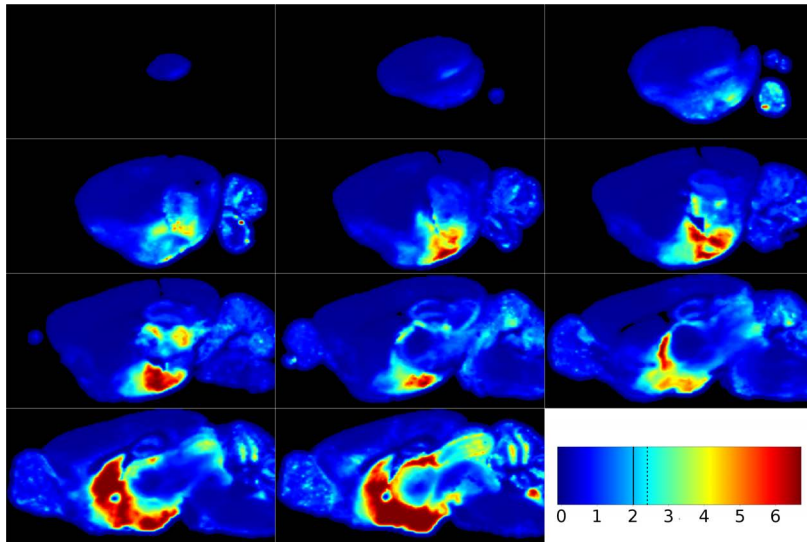

B

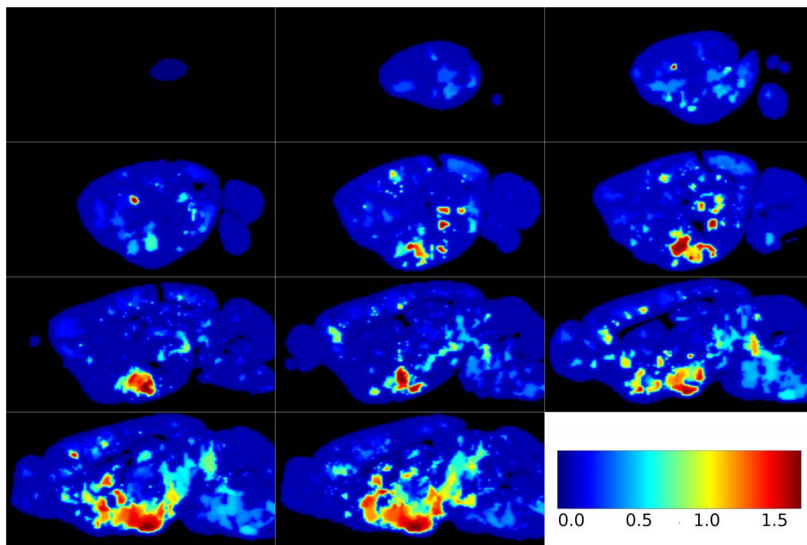

C



0 -log<sub>10</sub>(pvalue) 10

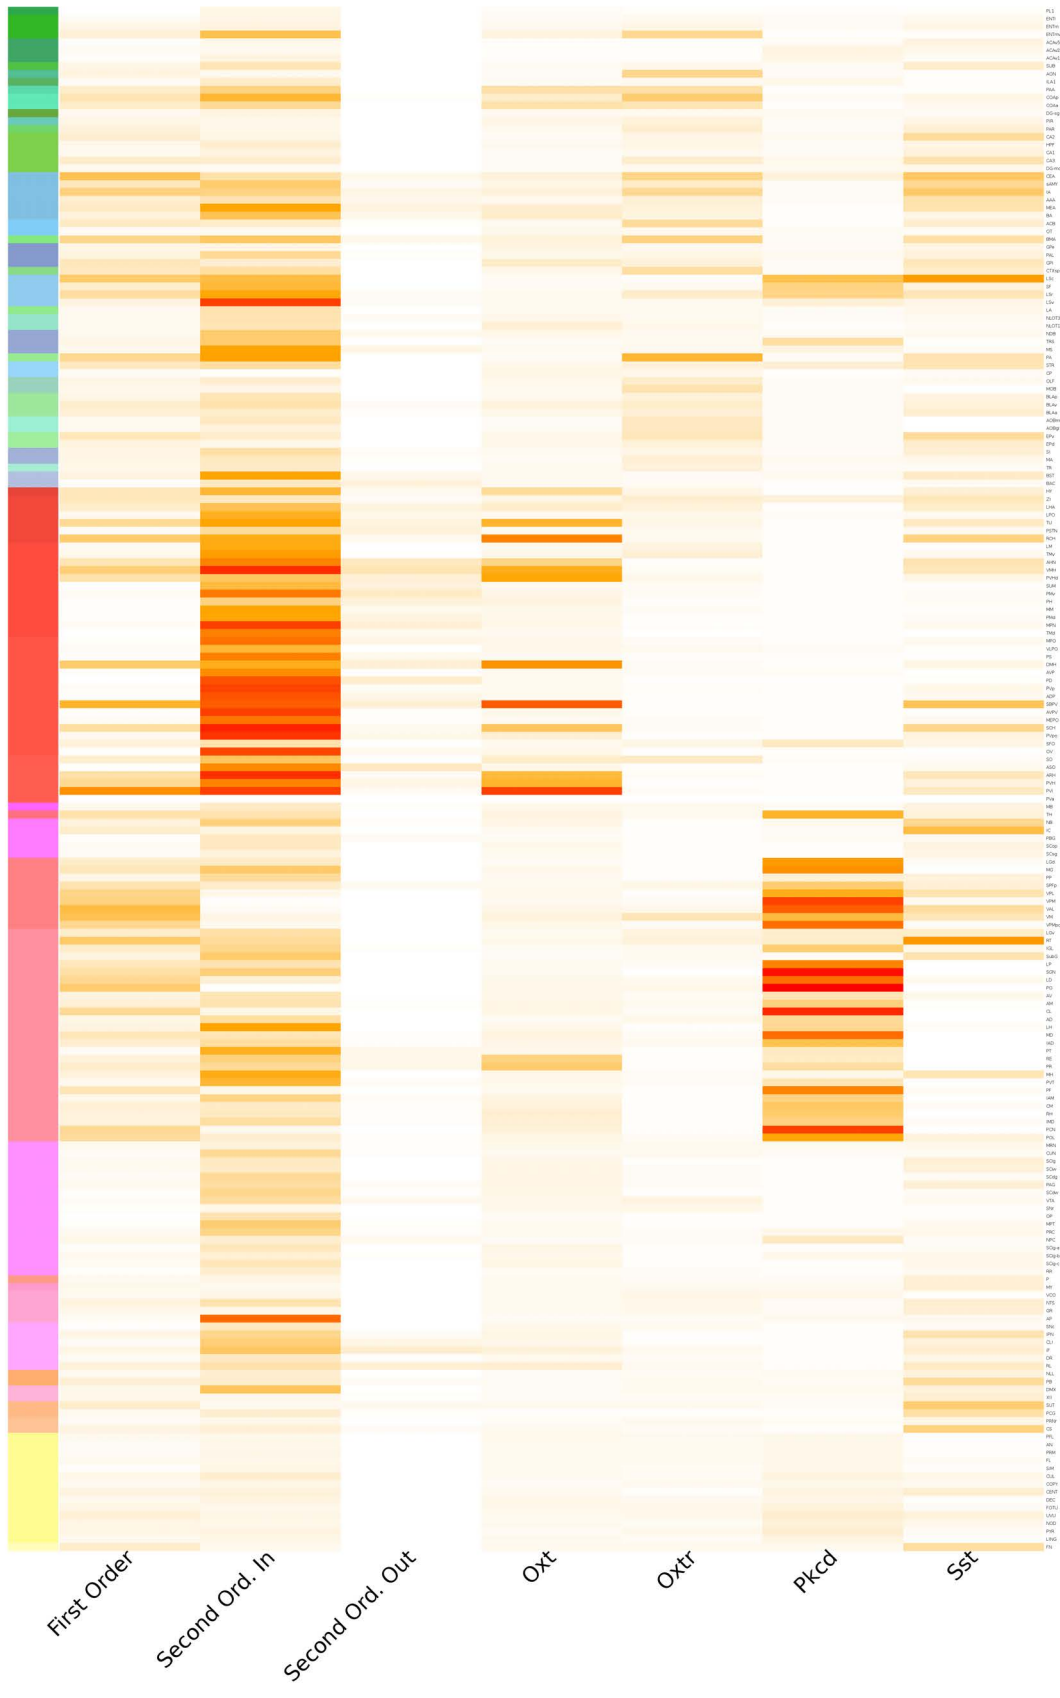

D

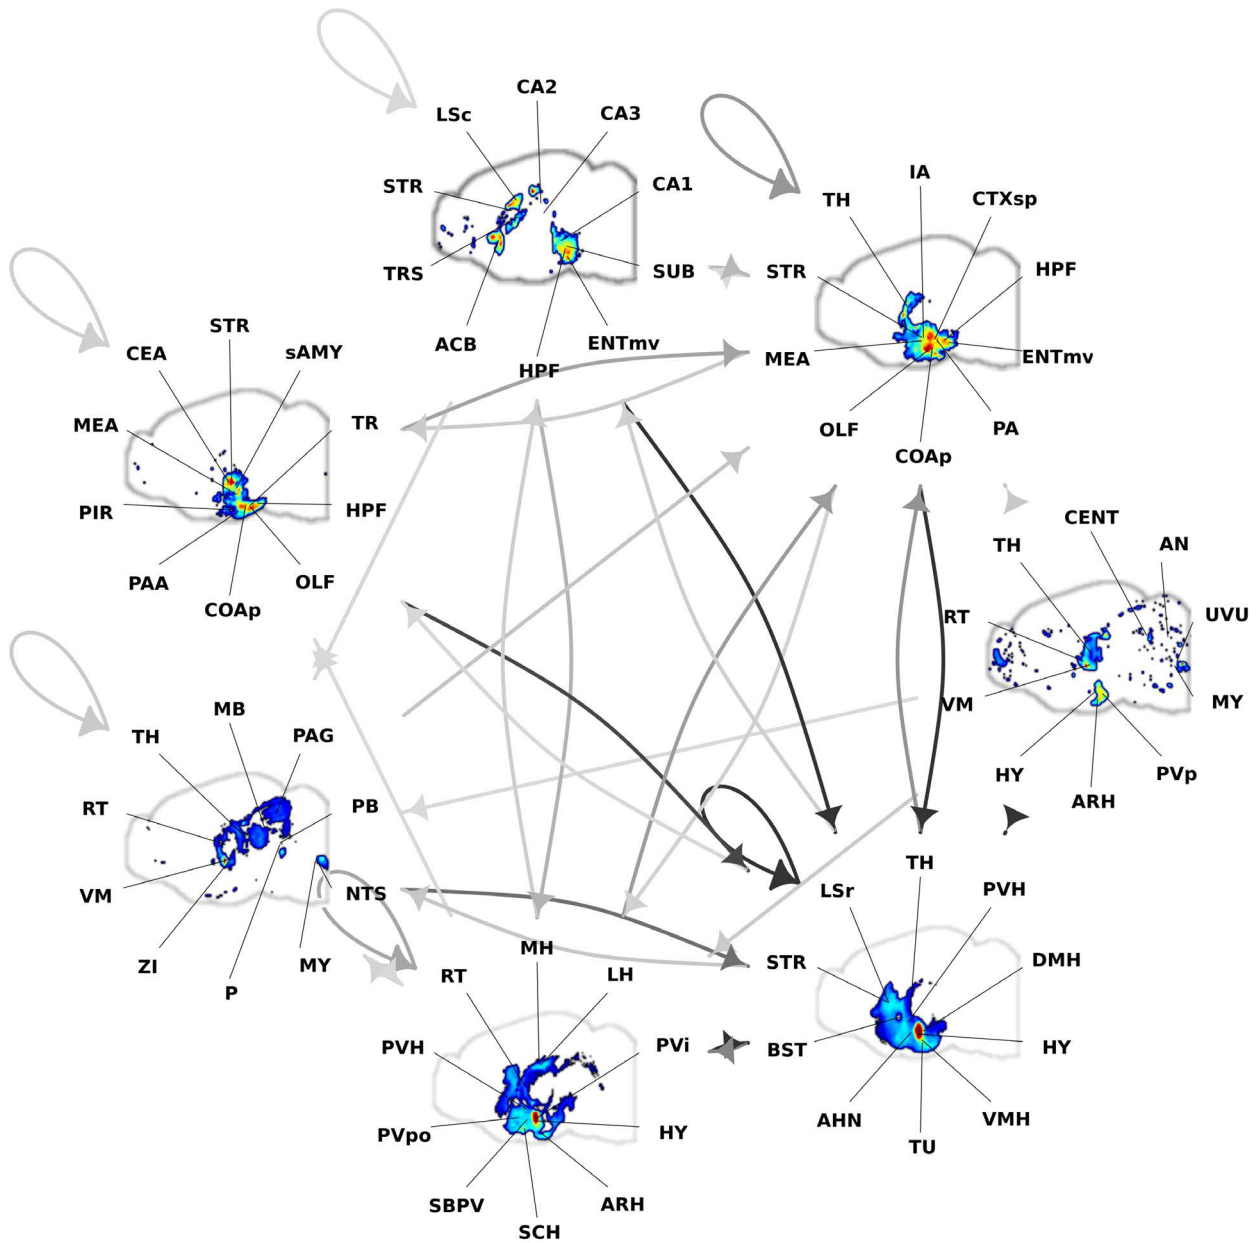

E

**Supplementary Data 3 Case 7. Hypothalamic Input to Central Amygdala gene-set from literature research.** (A) Slice-view of first order network measures given as  $-\log_{10}$  scaled p-values. (B) Slice-view of second order network measures (incoming node strength) given as  $-\log_{10}$  scaled p-values. (C) Slice-view of second order network measures (outgoing node strength) given as  $-\log_{10}$  scaled p-values. (D) Heatmap of average log-scaled p-values of first and second order effects as well as single gene effects. (E) Clustered network graph. Clusters of significant brain regions (FDR=0.05) with similar connectivity and their structural connectivity (normalized by the injection volume) given as grey-scale arrows.

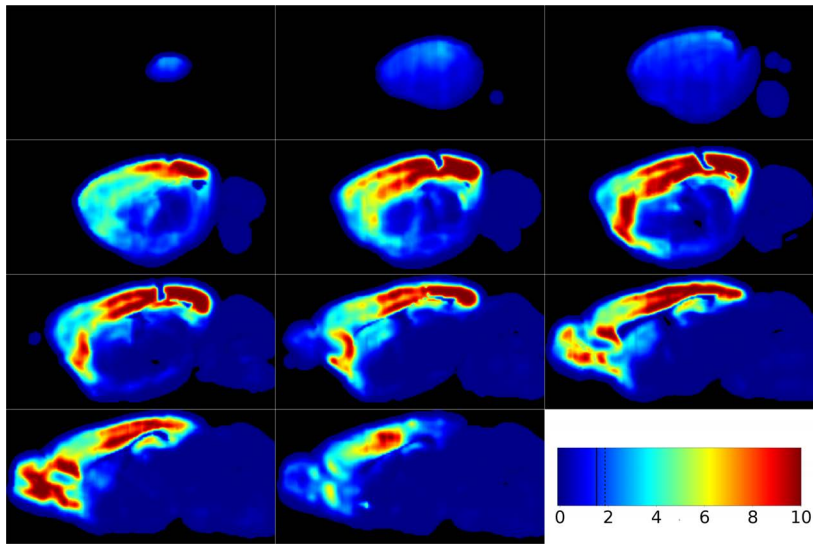

A

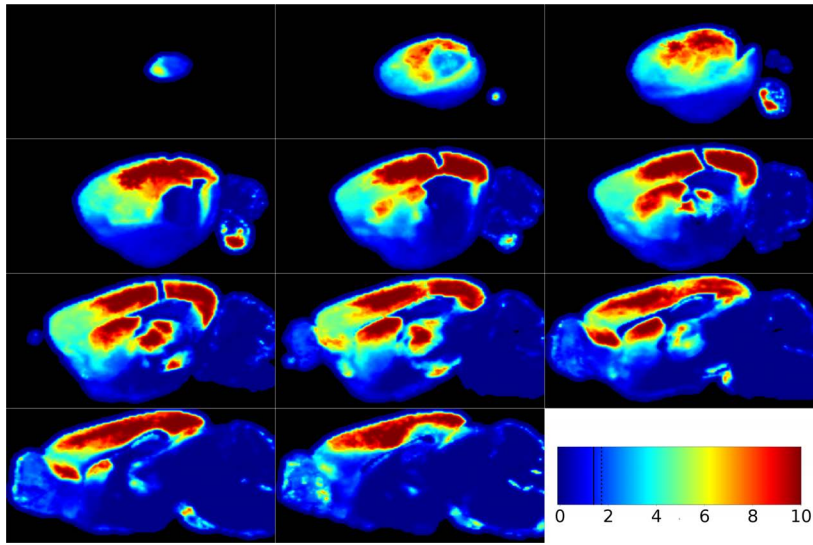

B

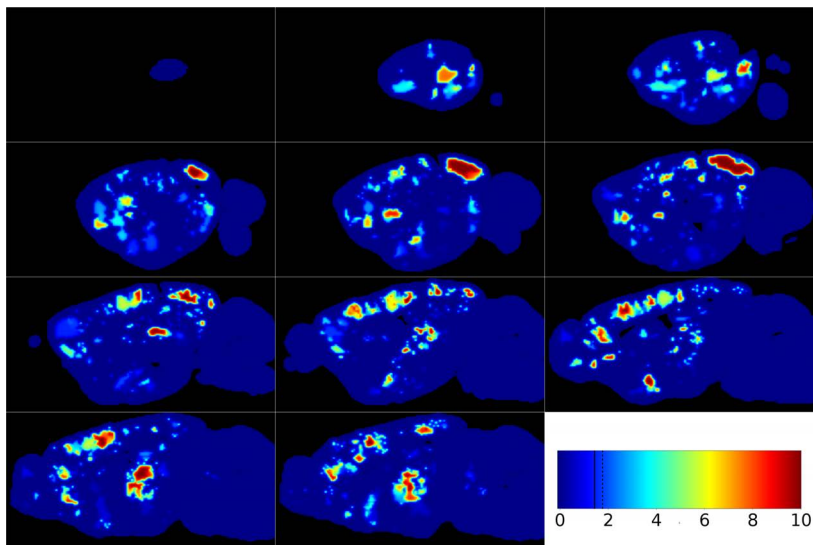

C

0 -log<sub>10</sub>(pvalue) 10

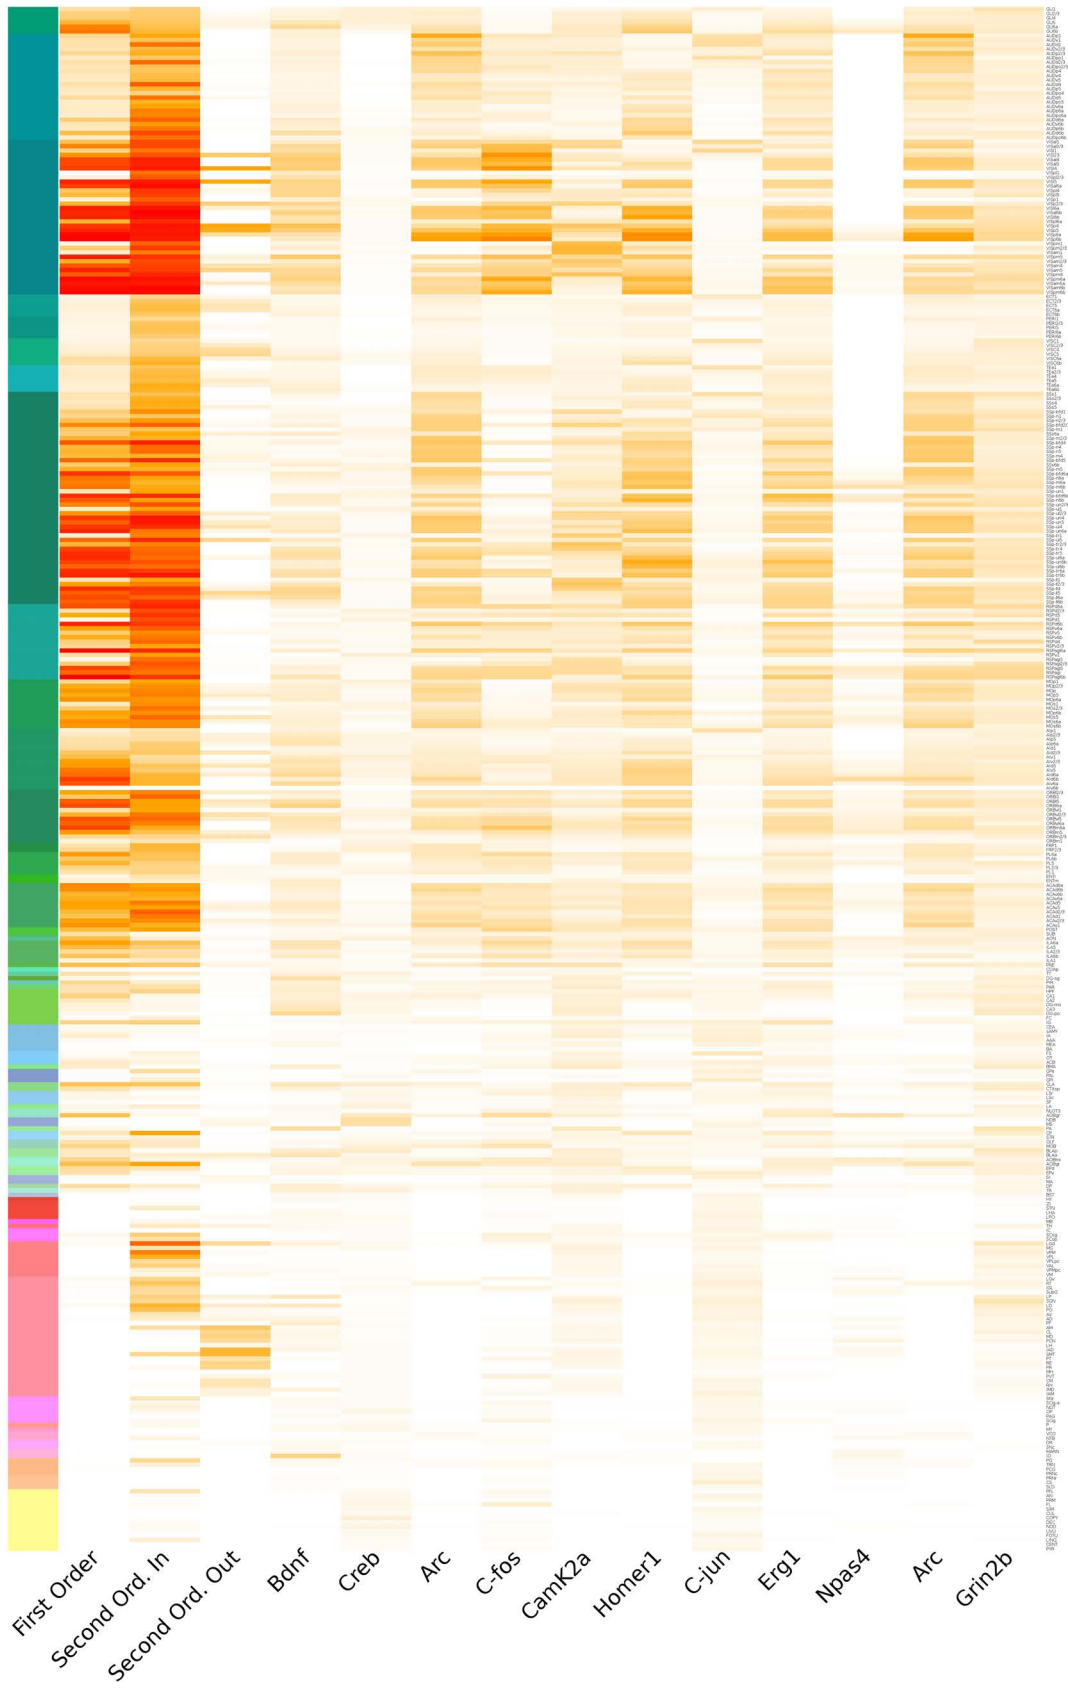

D

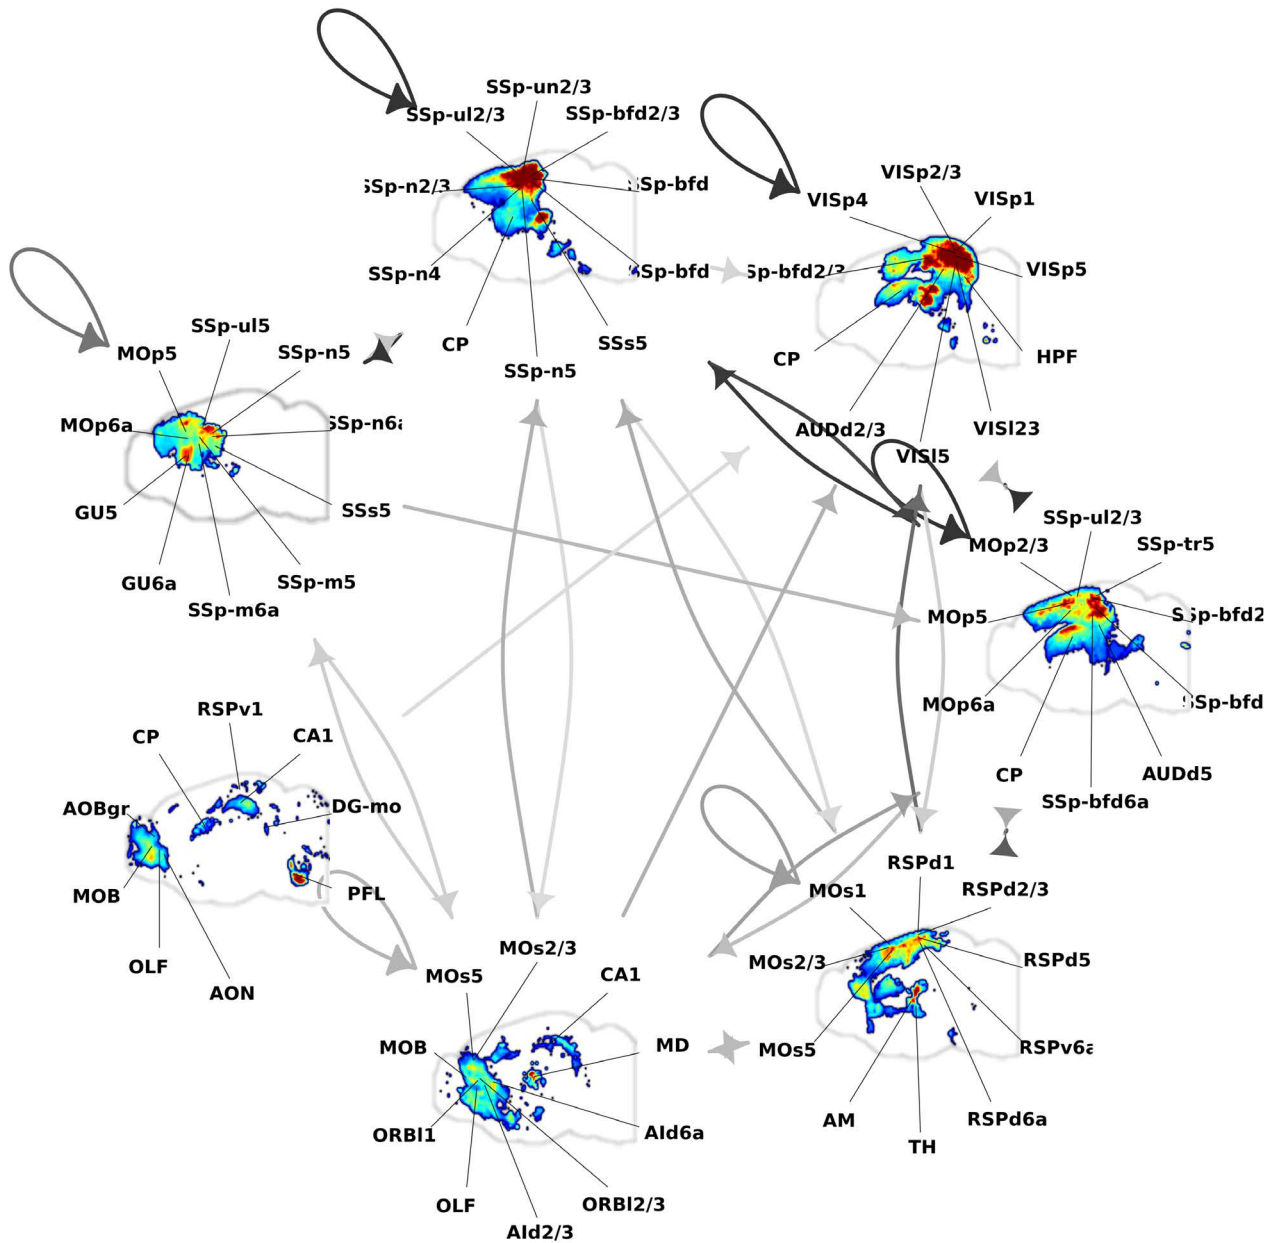

E

**Supplementary Data 3 Case 8. Long Term Potentiation gene-set from literature research.** (A) Slice-view of first order network measures given as  $-\log_{10}$  scaled p-values. (B) Slice-view of second order network measures (incoming node strength) given as  $-\log_{10}$  scaled p-values. (C) Slice-view of second order network measures (outgoing node strength) given as  $-\log_{10}$  scaled p-values. (D) Heatmap of average log-scaled p-values of first and second order effects as well as single gene effects. (E) Clustered network graph. Clusters of significant brain regions (FDR=0.05) with similar connectivity and their structural connectivity (normalized by the injection volume) given as grey-scale arrows.



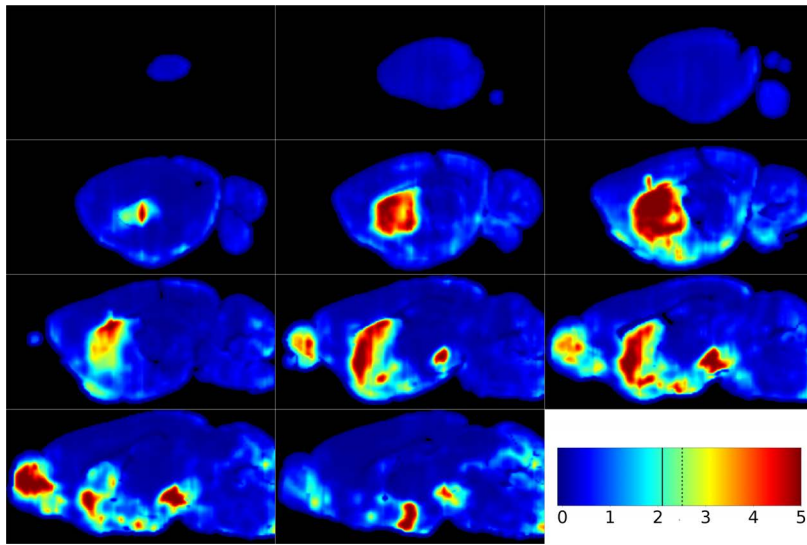

A

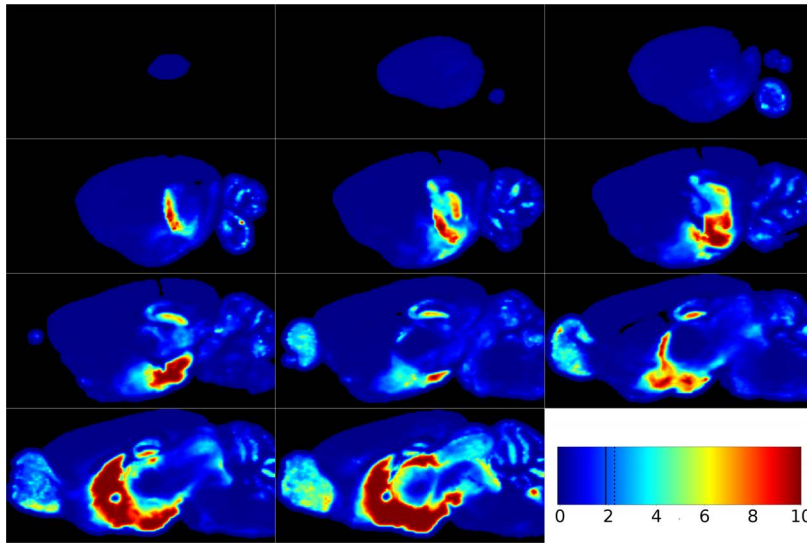

B

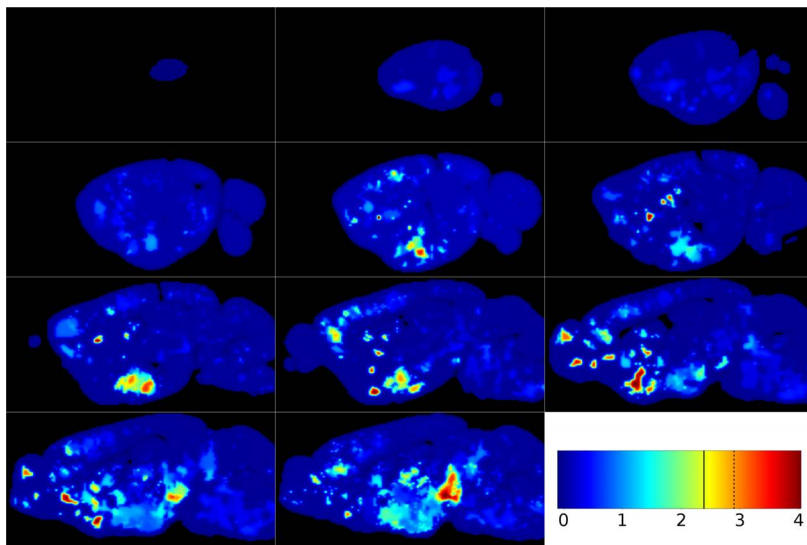

C

0 -log<sub>10</sub>(pvalue) 10

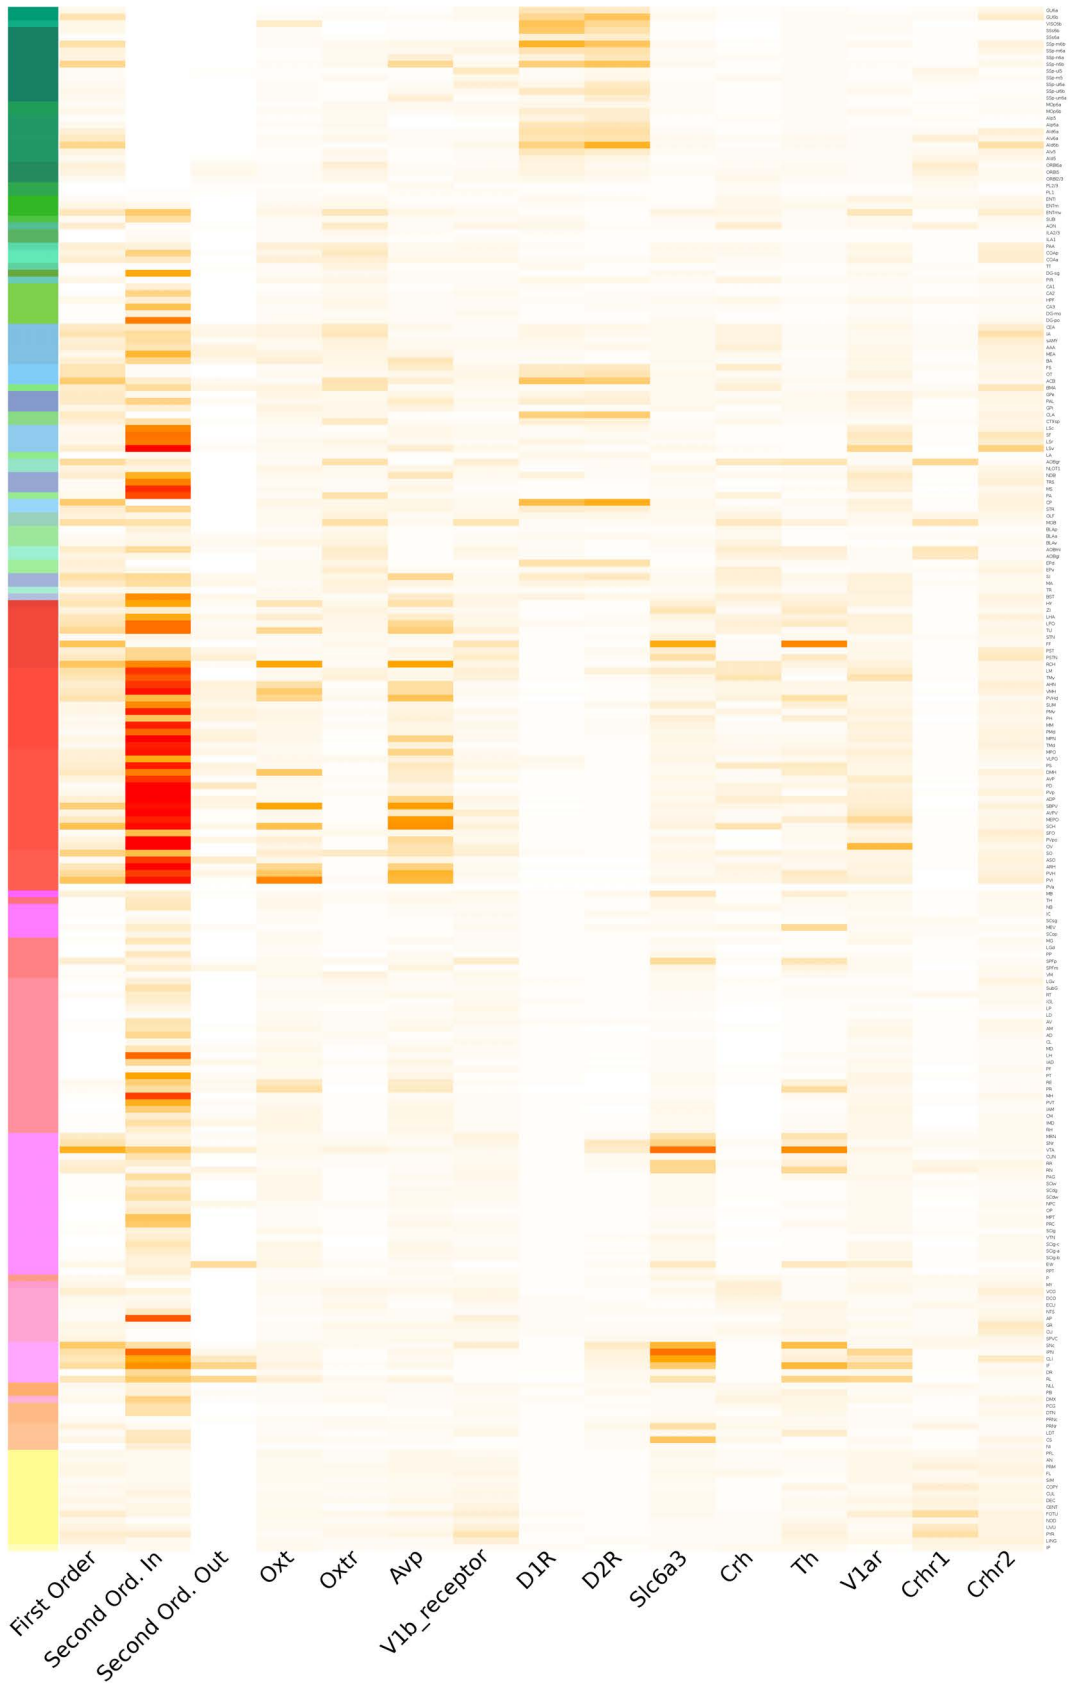

D

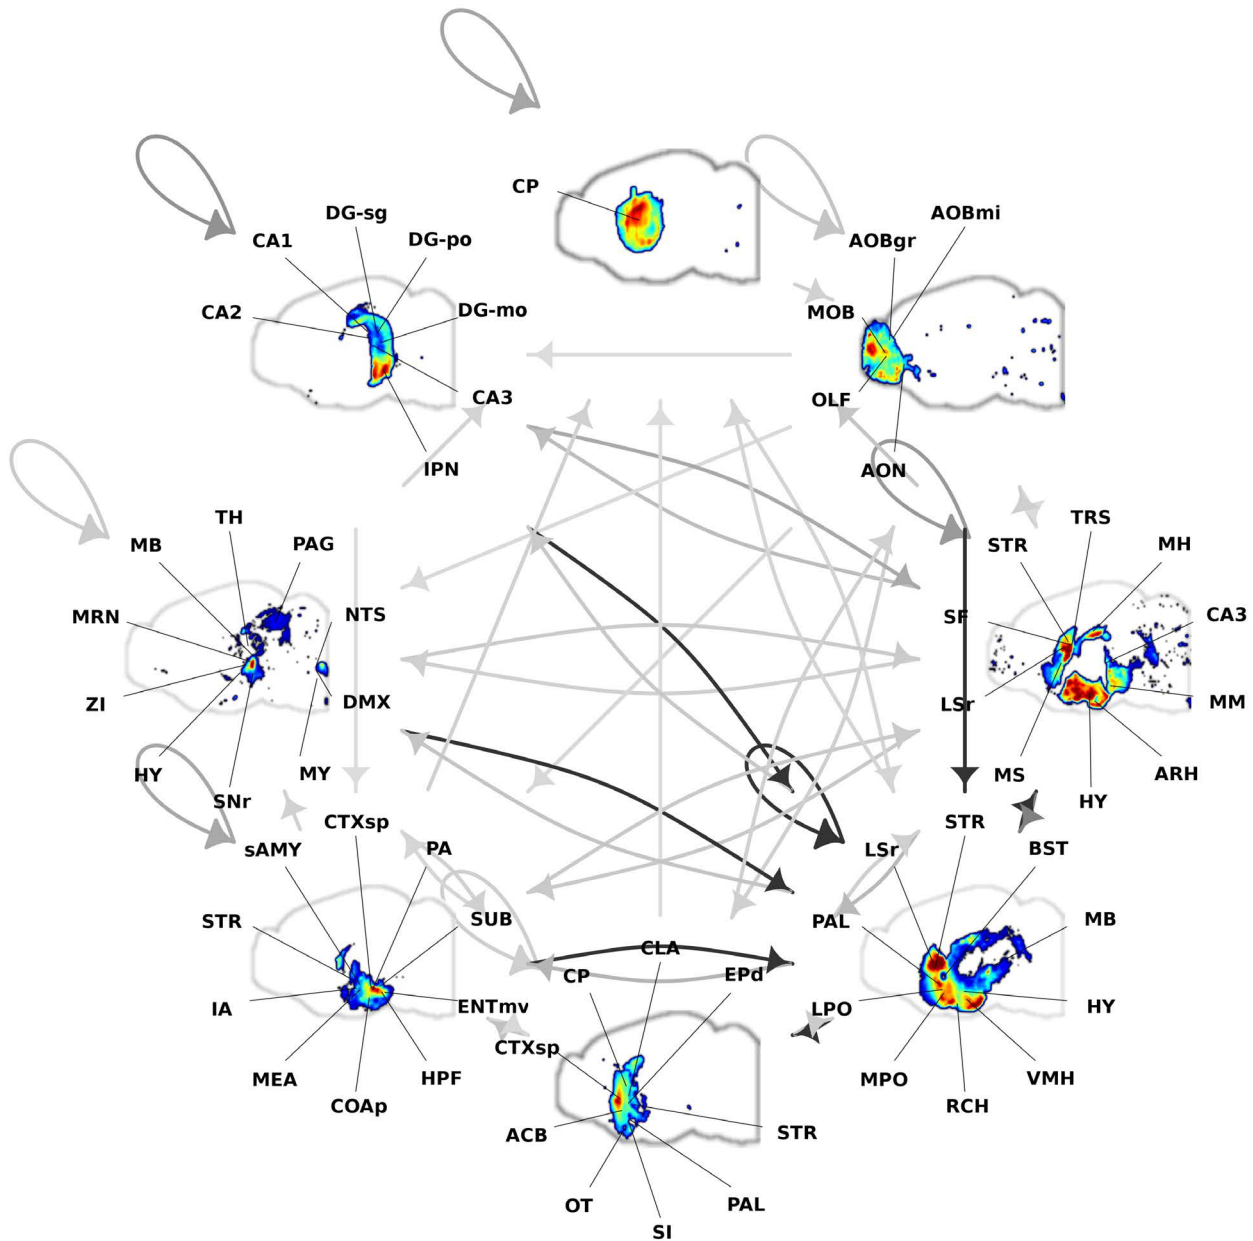

E

**Supplementary Data 3 Case 9. Social behavior gene-set from literature research.** (A) Slice-view of first order network measures given as  $-\log_{10}$  scaled p-values. (B) Slice-view of second order network measures (incoming node strength) given as  $-\log_{10}$  scaled p-values. (C) Slice-view of second order network measures (outgoing node strength) given as  $-\log_{10}$  scaled p-values. (D) Heatmap of average log-scaled p-values of first and second order effects as well as single gene effects. (E) Clustered network graph. Clusters of significant brain regions (FDR=0.05) with similar connectivity and their structural connectivity (normalized by the injection volume) given as grey-scale arrows.

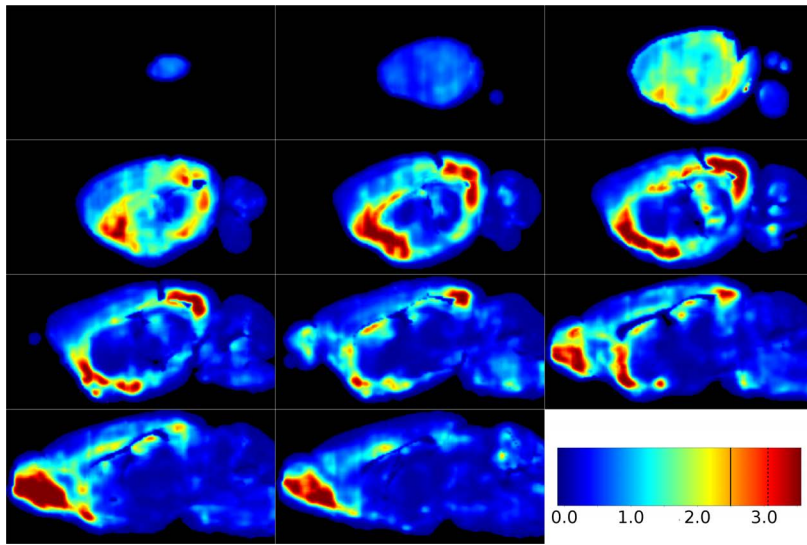

A

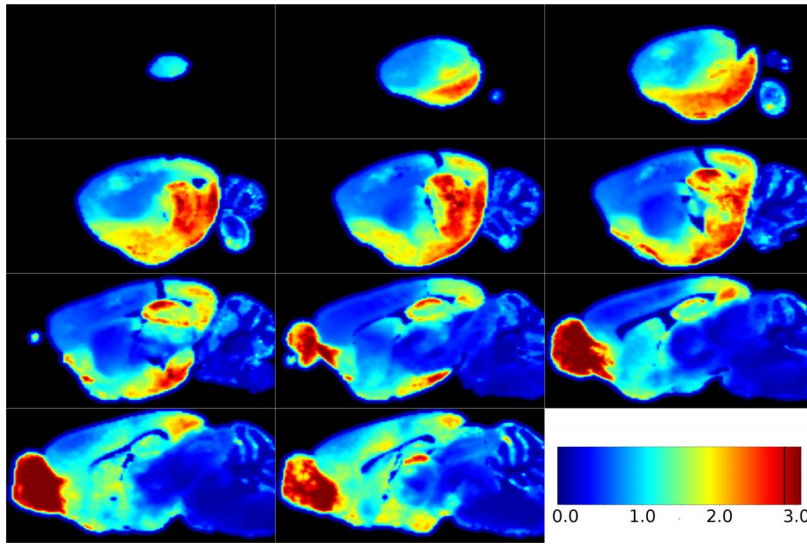

B

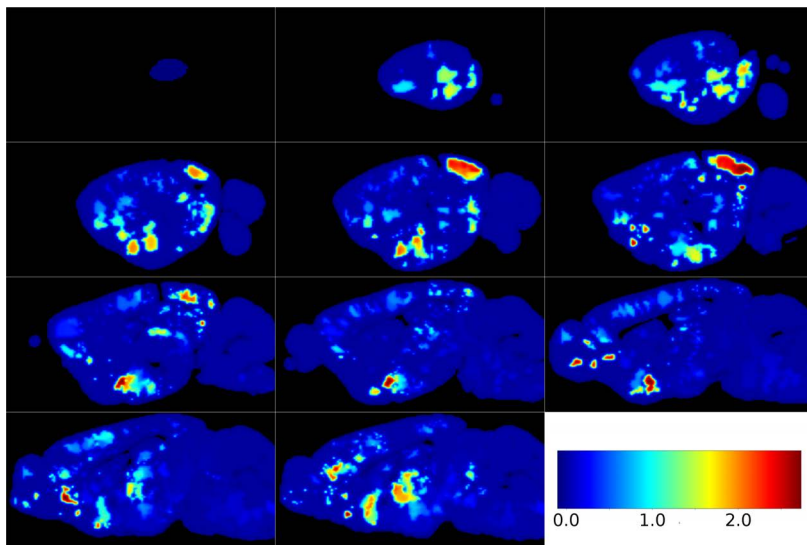

C

0 -log<sub>10</sub>(pvalue) 10

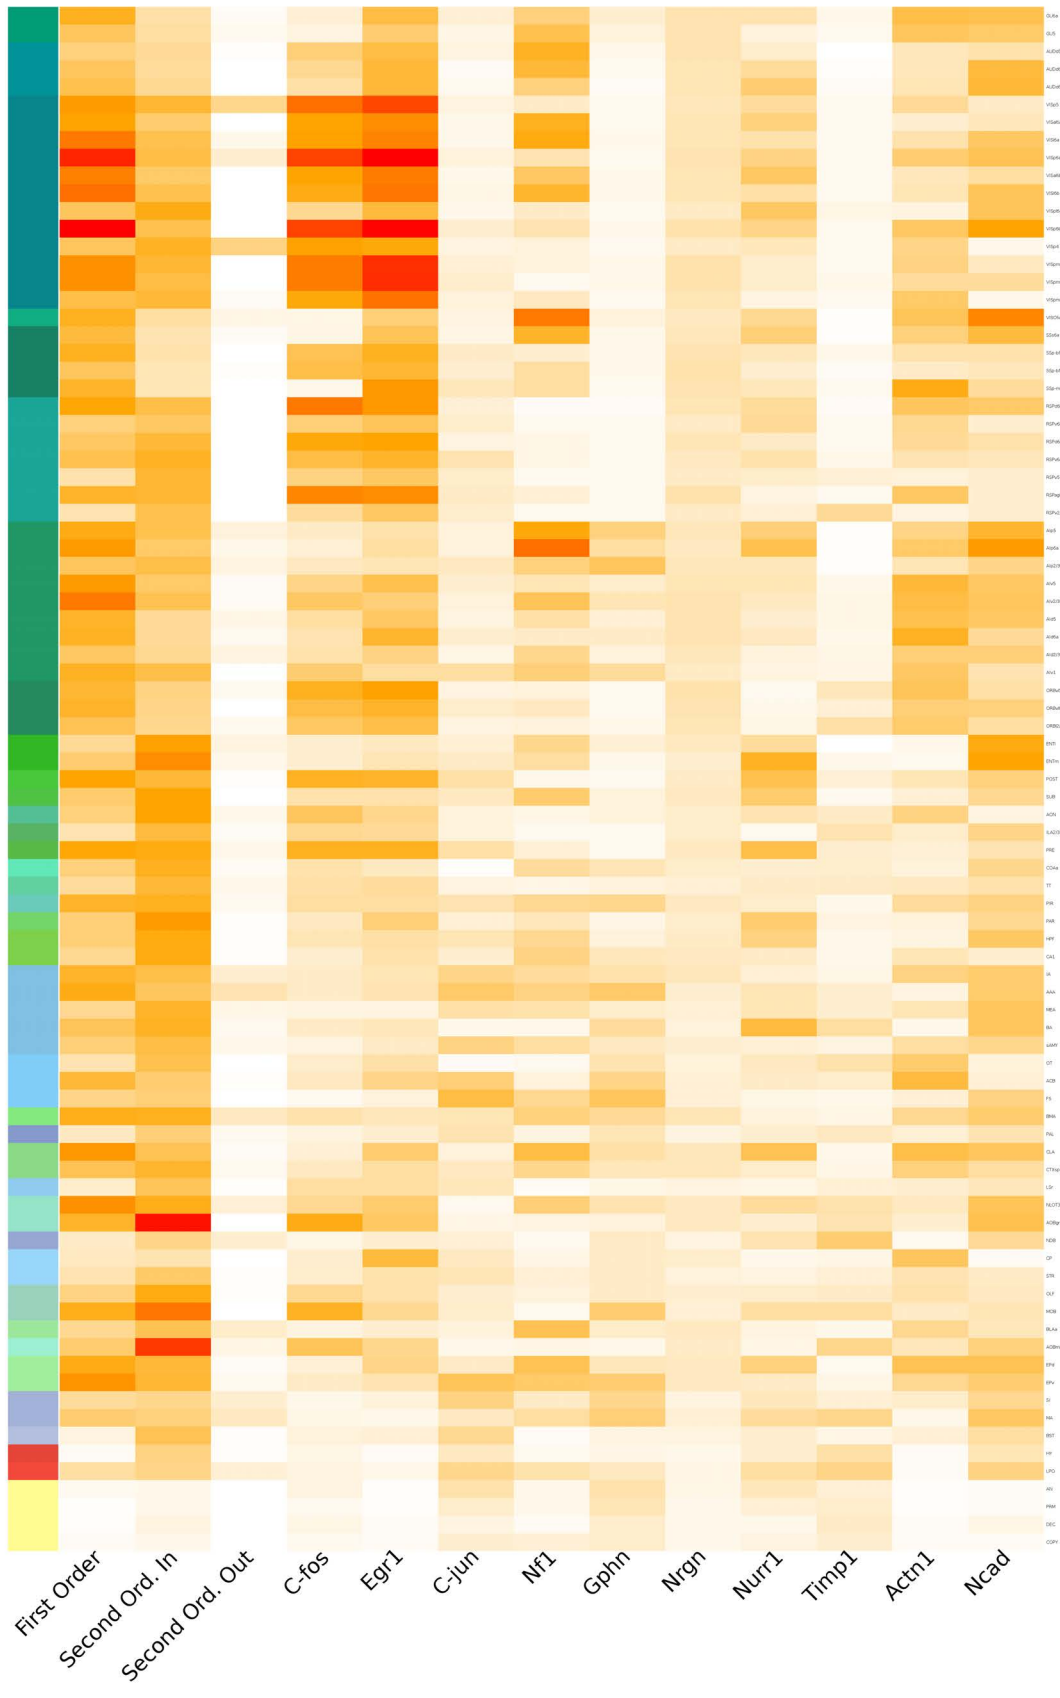

D



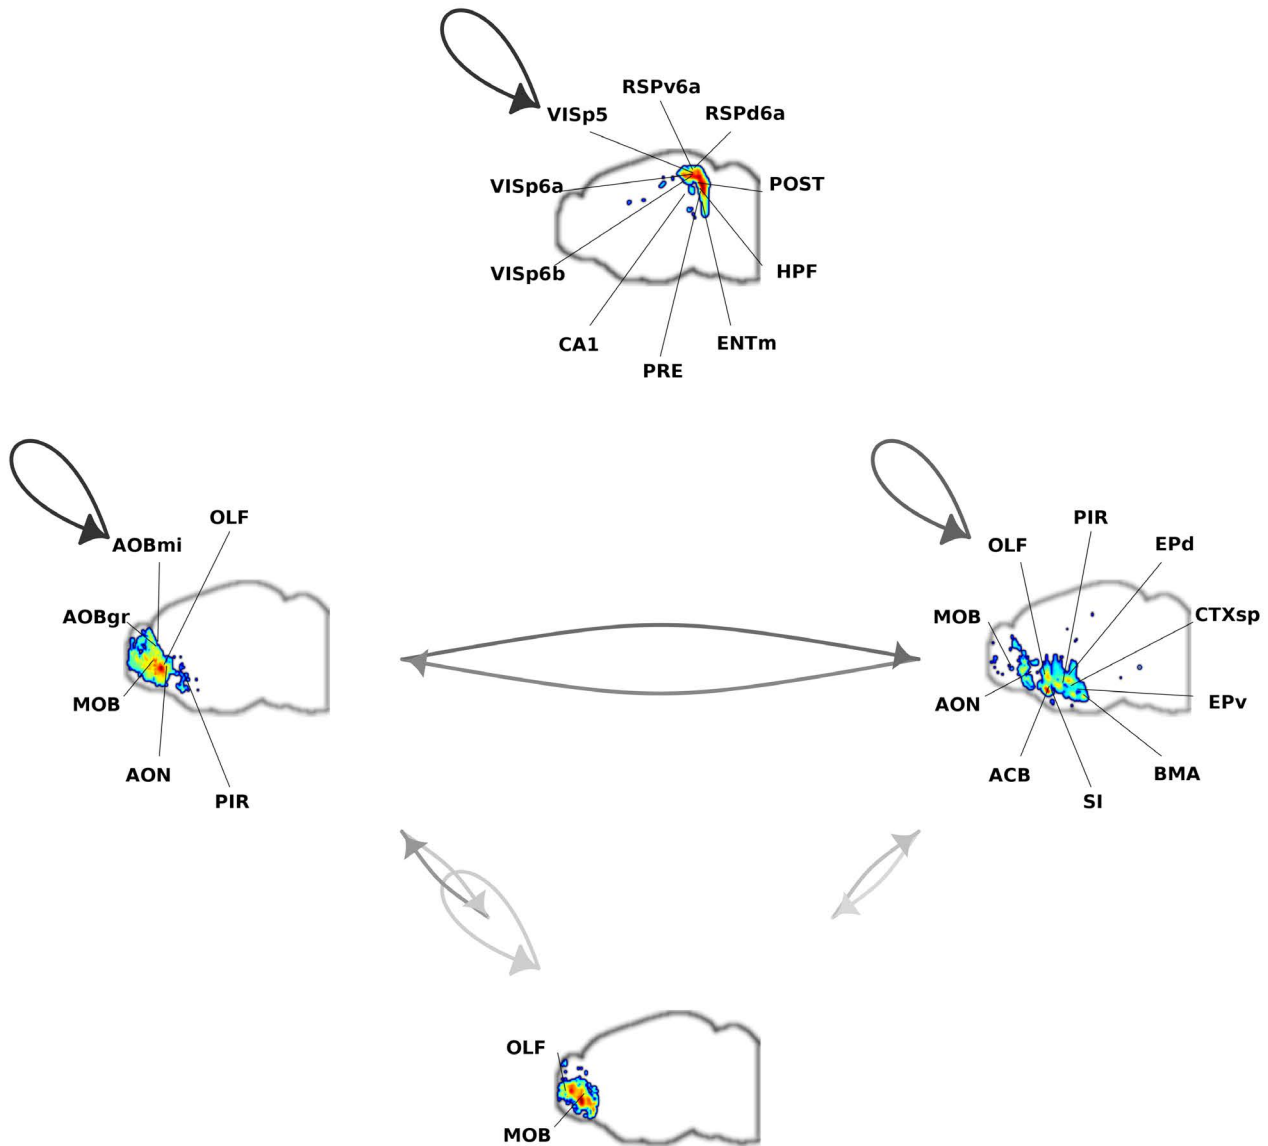

E

**Supplementary Data 3 Case 10. Synaptic plasticity genes after fear learning gene-set from literature research.** (A) Slice-view of first order network measures given as  $-\log_{10}$  scaled p-values. (B) Slice-view of second order network measures (incoming node strength) given as  $-\log_{10}$  scaled p-values. (C) Slice-view of second order network measures (outgoing node strength) given as  $-\log_{10}$  scaled p-values. (D) Heatmap of average log-scaled p-values of first and second order effects as well as single gene effects. (E) Clustered network graph. Clusters of significant brain regions (FDR=0.05) with similar connectivity and their structural connectivity (normalized by the injection volume) given as grey-scale arrows.

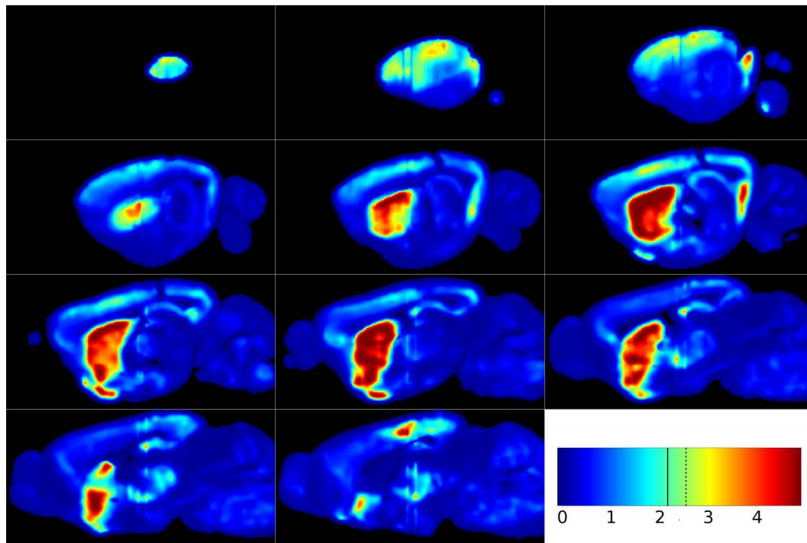

A

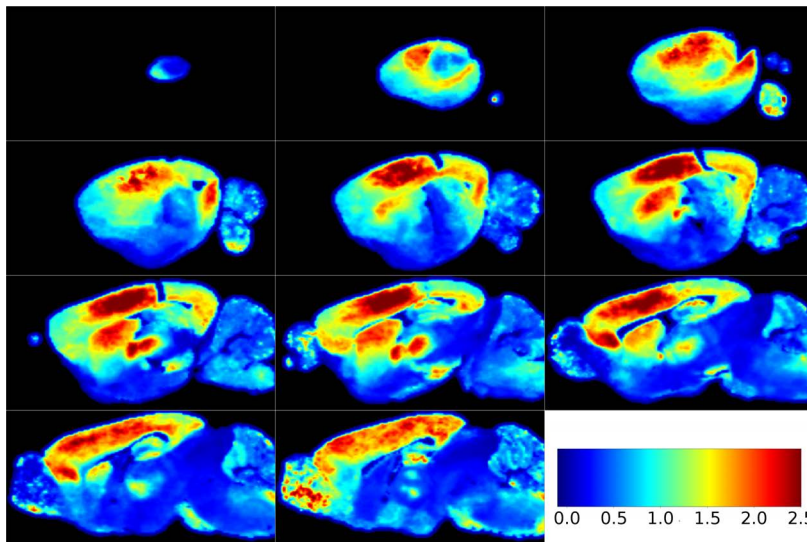

B

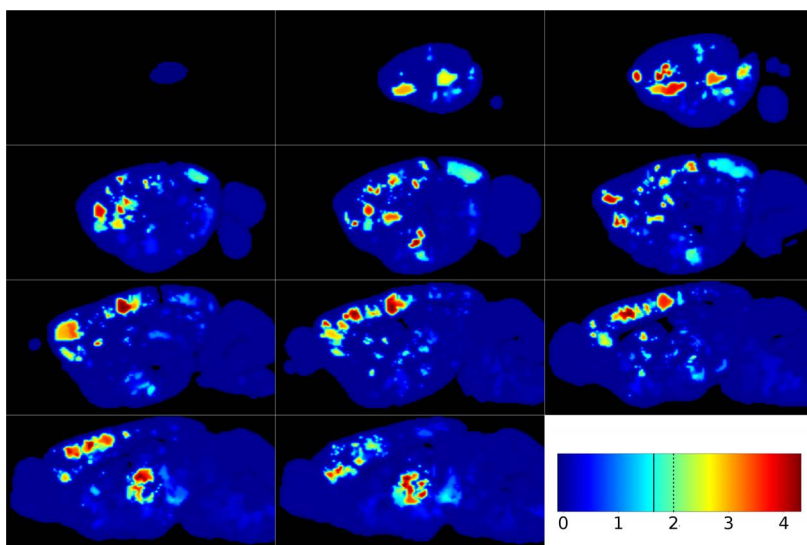

C

0 -log10(pvalue) 10

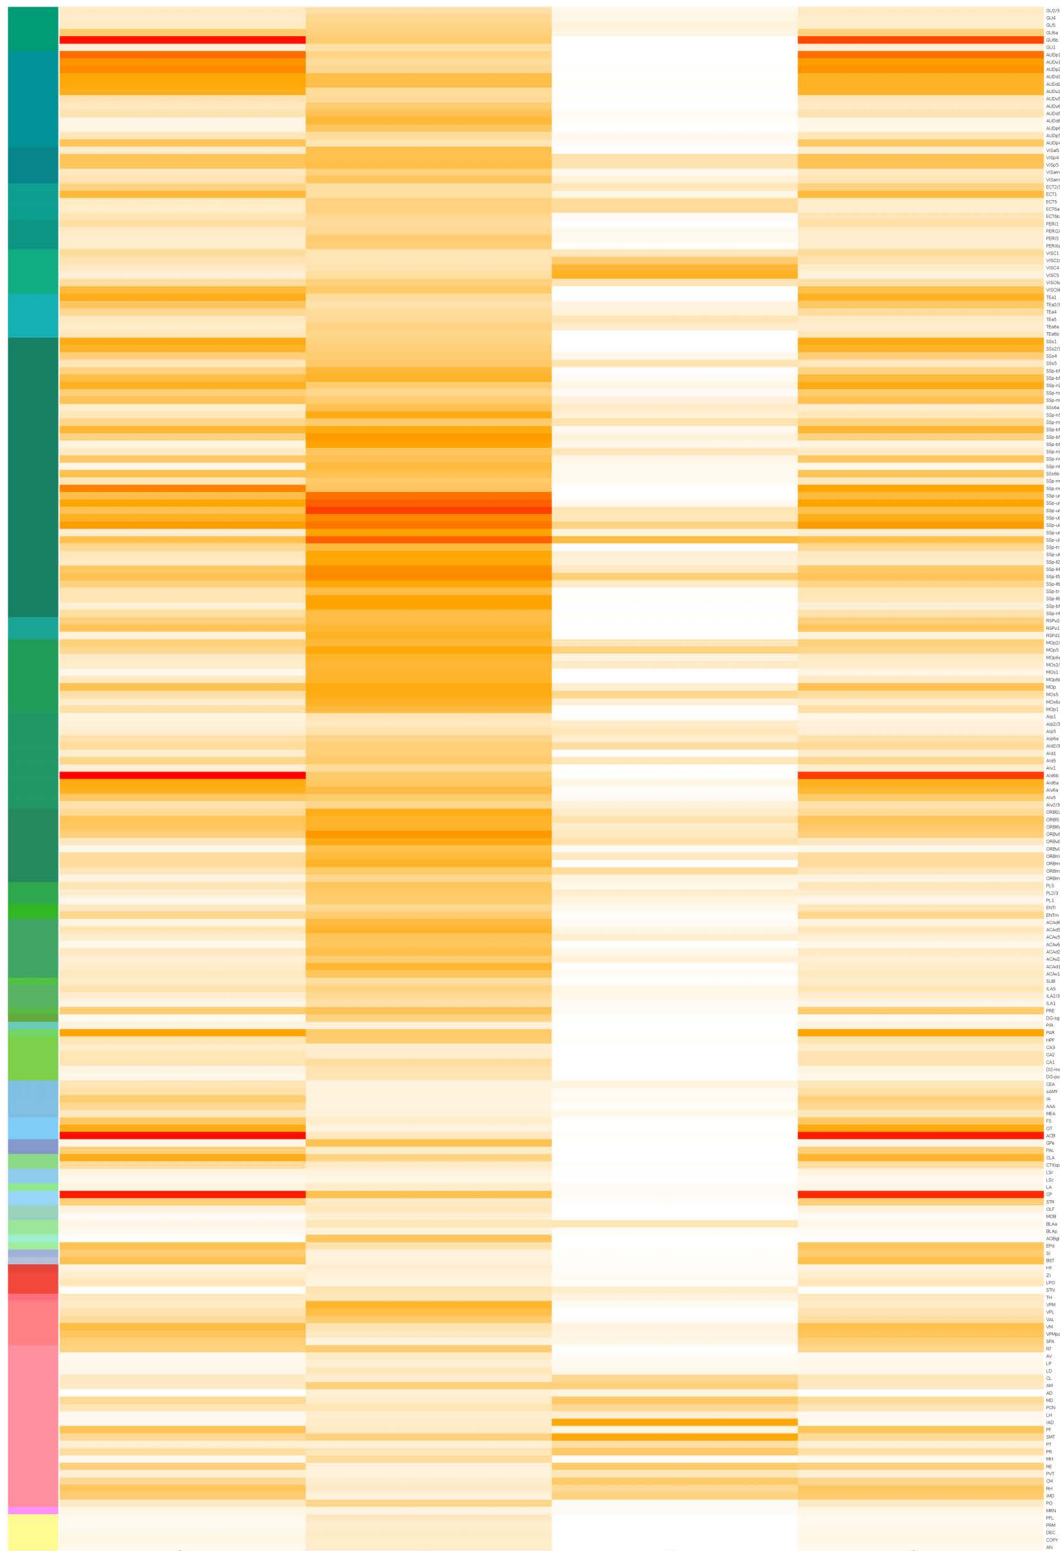

First Order

Second Ord. In

Second Ord. Out

CACNA2D3

D

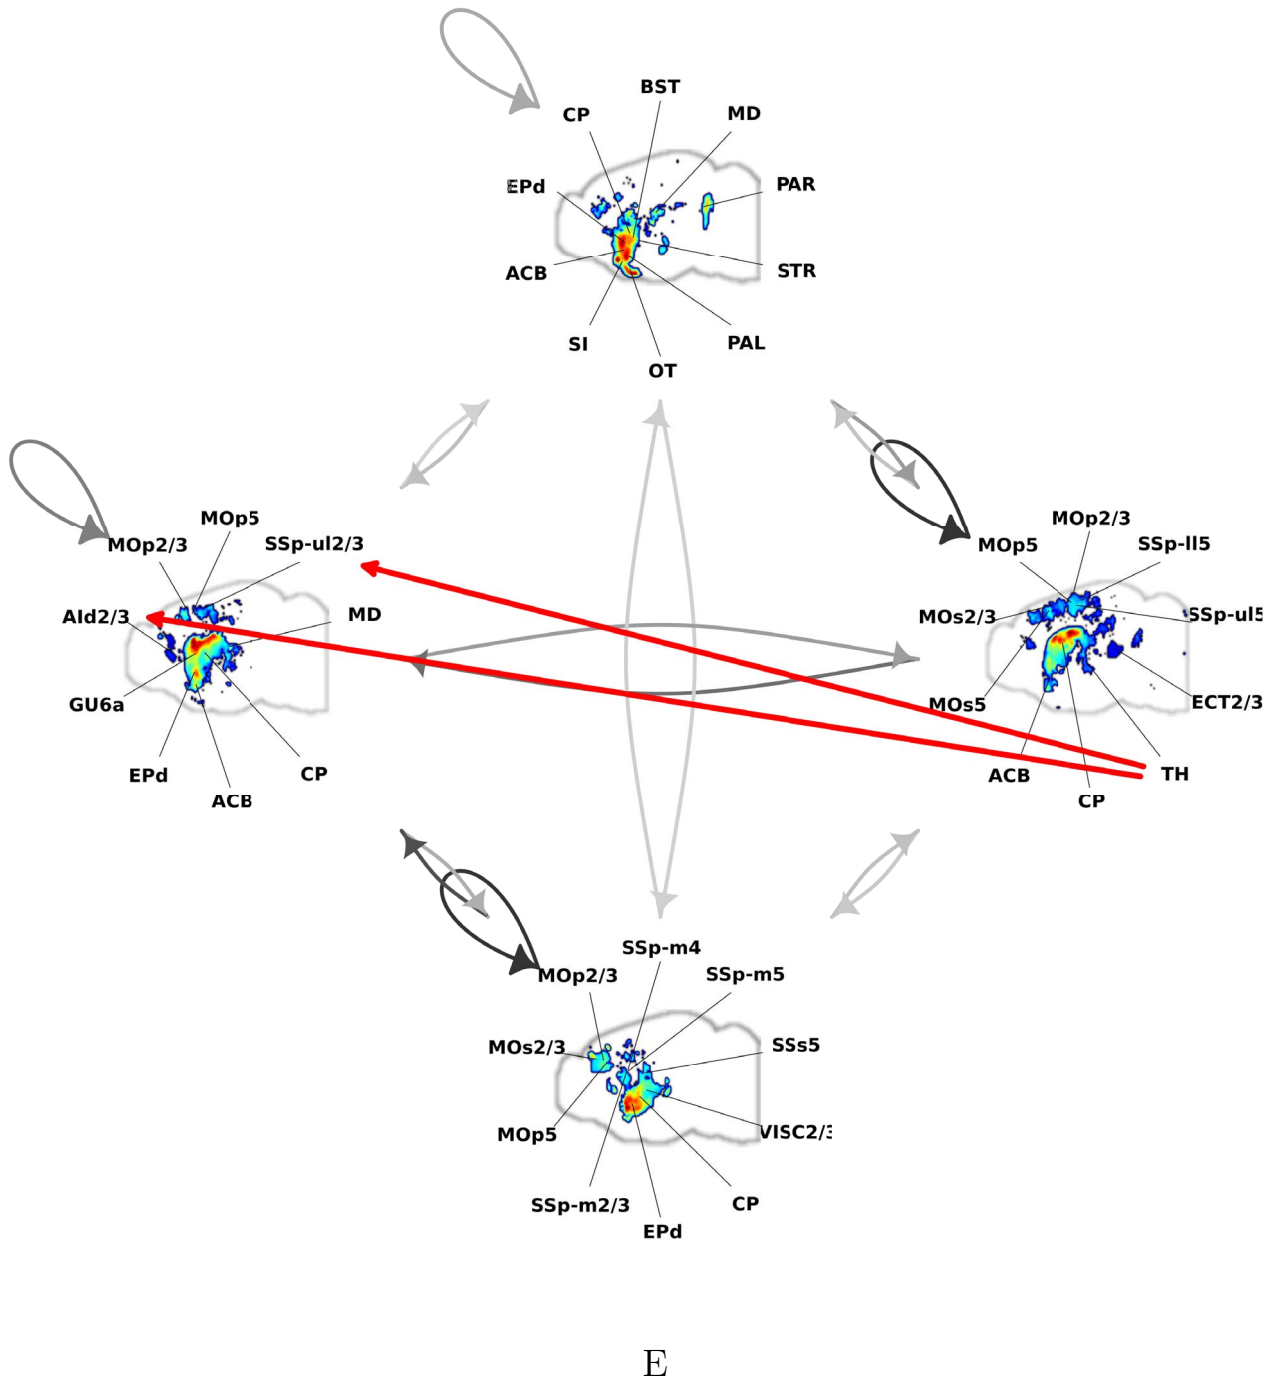

**Supplementary Data 3 Case 11. Cacna2d3 gene.** (A) Slice-view of first order network measures given as  $-\log_{10}$  scaled p-values. (B) Slice-view of second order network measures (incoming node strength) given as  $-\log_{10}$  scaled p-values. (C) Slice-view of second order network measures (outgoing node strength) given as  $-\log_{10}$  scaled p-values. (D) Heatmap of average log-scaled p-values of first and second order effects as well as single gene effects. (E) Clustered network graph. Clusters of significant brain regions (FDR=0.05) with similar connectivity and their structural connectivity (normalized by the injection volume) given as grey-scale arrows. Red arrows mark selected connections, discussed in the main text.

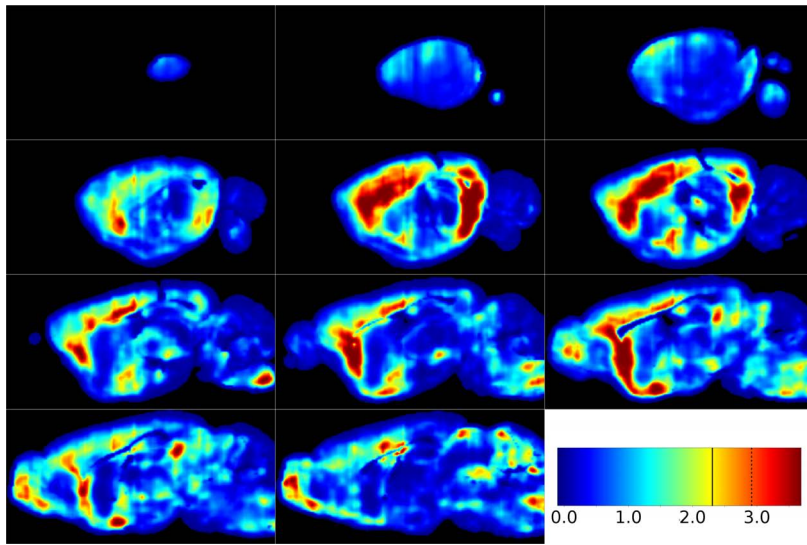

A

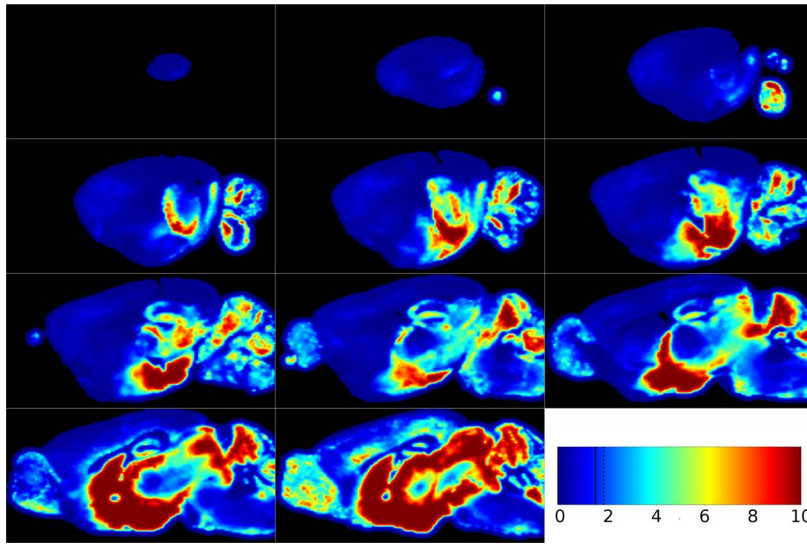

B

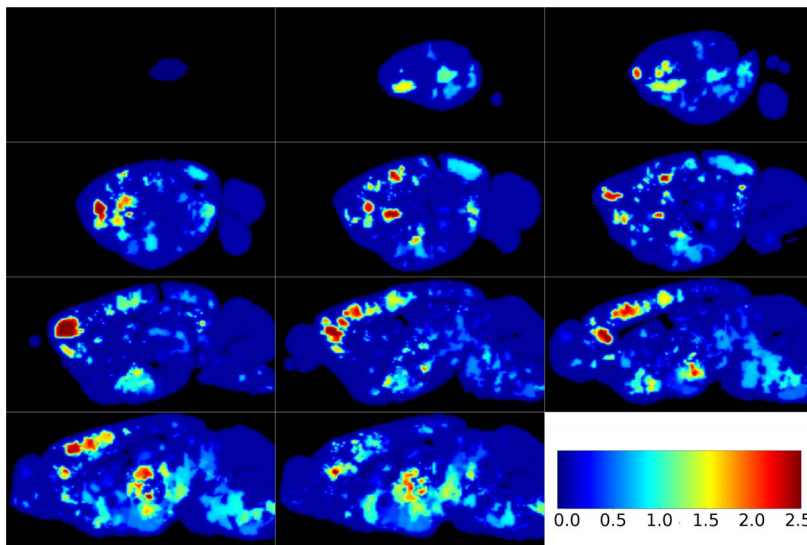

C



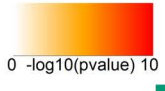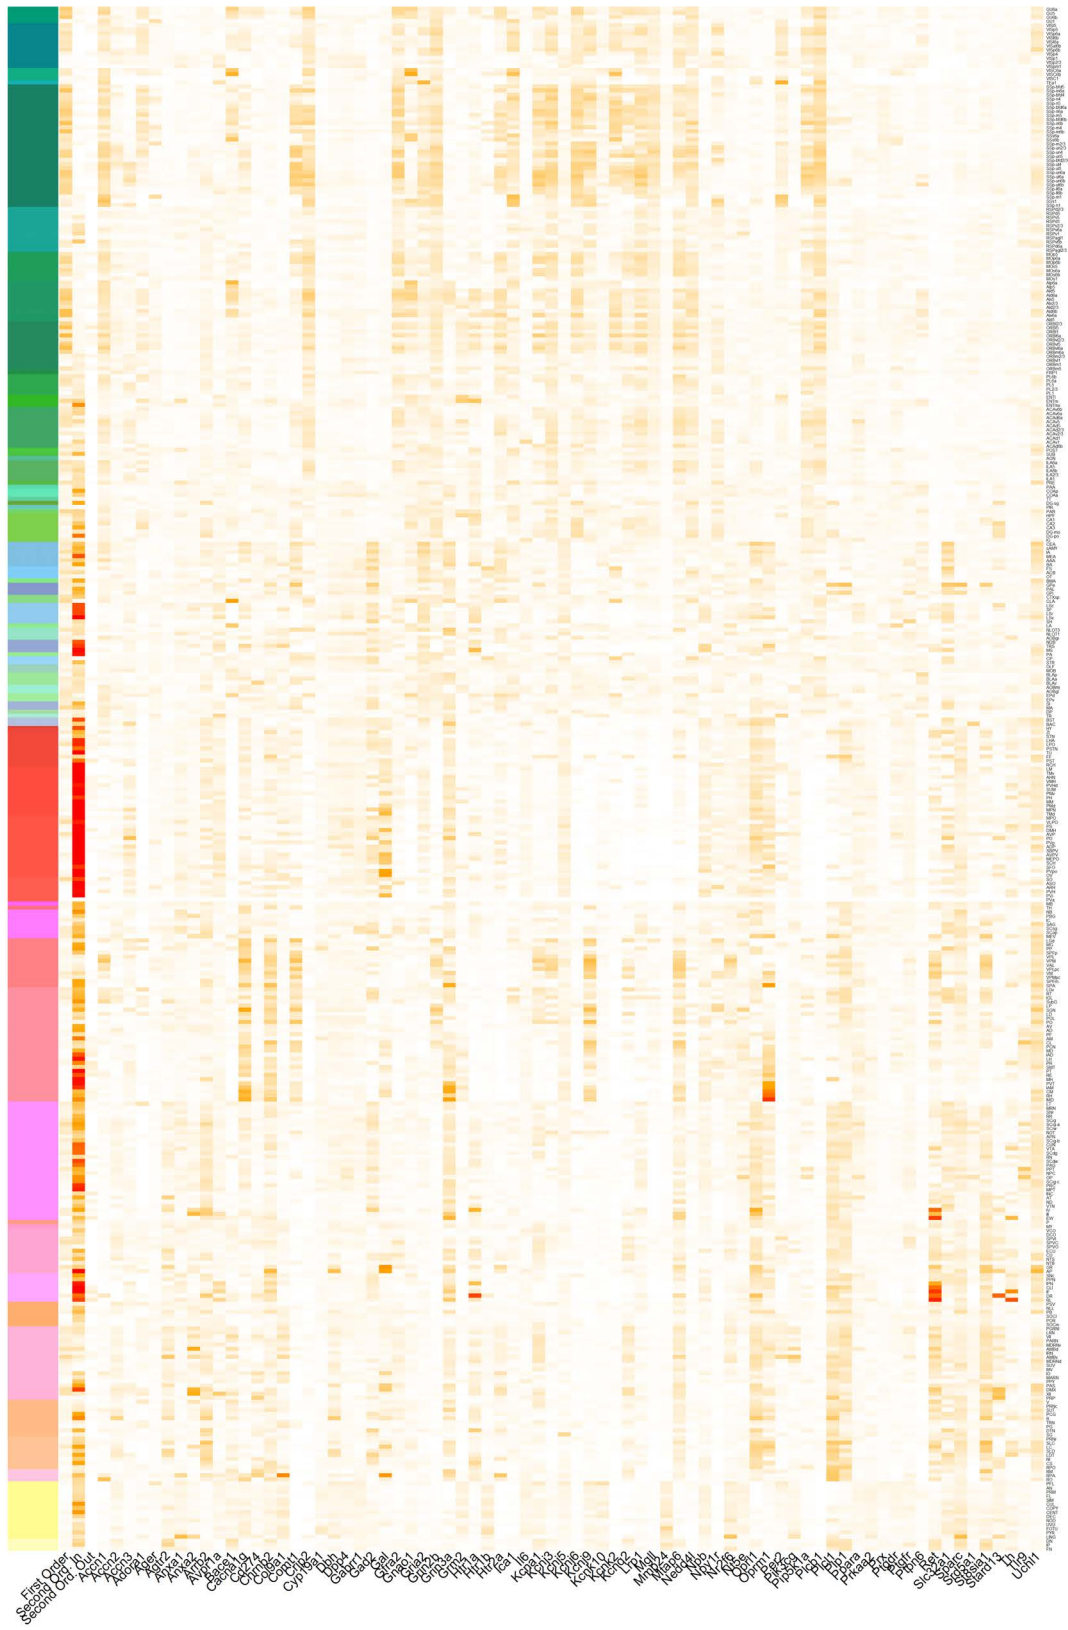

D

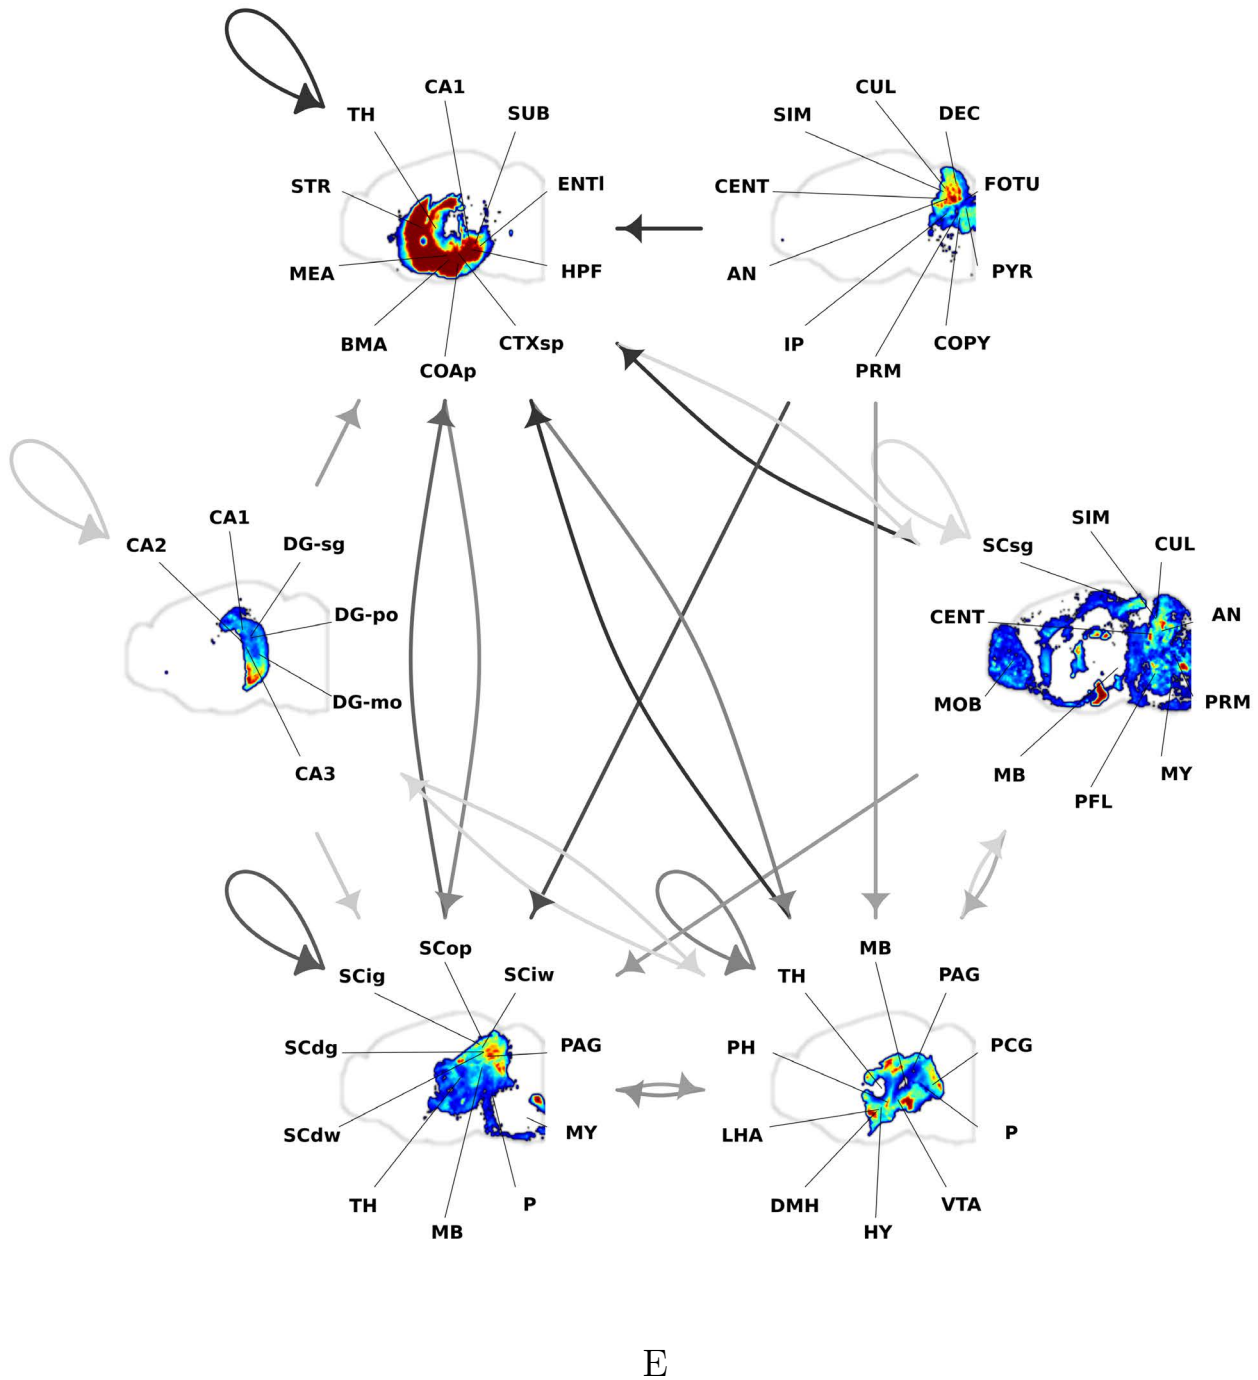

E

**Supplementary Data 3 Case 12. Nociception( up-regulated) gene-set of pain QTLs.** (A) Slice-view of first order network measures given as  $-\log_{10}$  scaled p-values. (B) Slice-view of second order network measures (incoming node strength) given as  $-\log_{10}$  scaled p-values. (C) Slice-view of second order network measures (outgoing node strength) given as  $-\log_{10}$  scaled p-values. (D) Heatmap of average log-scaled p-values of first and second order effects as well as single gene effects. (E) Clustered network graph. Clusters of significant brain regions (FDR=0.05) with similar connectivity and their structural connectivity (normalized by the injection volume) given as grey-scale arrows.

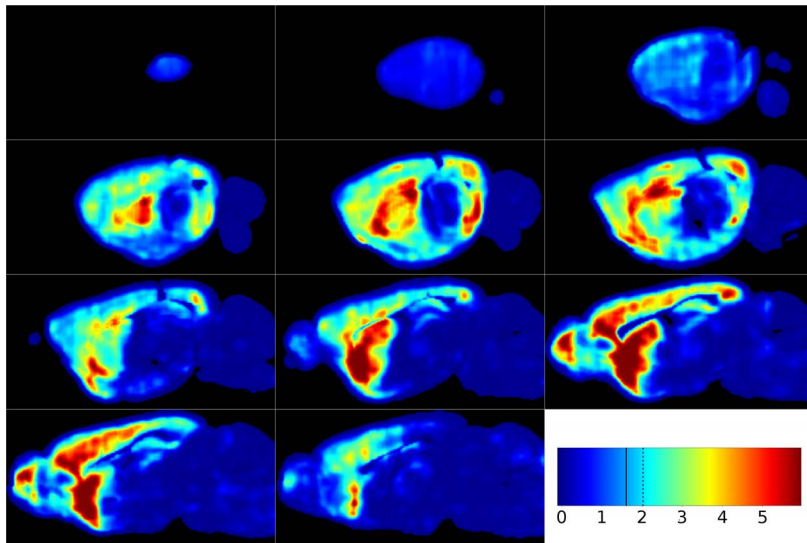

A

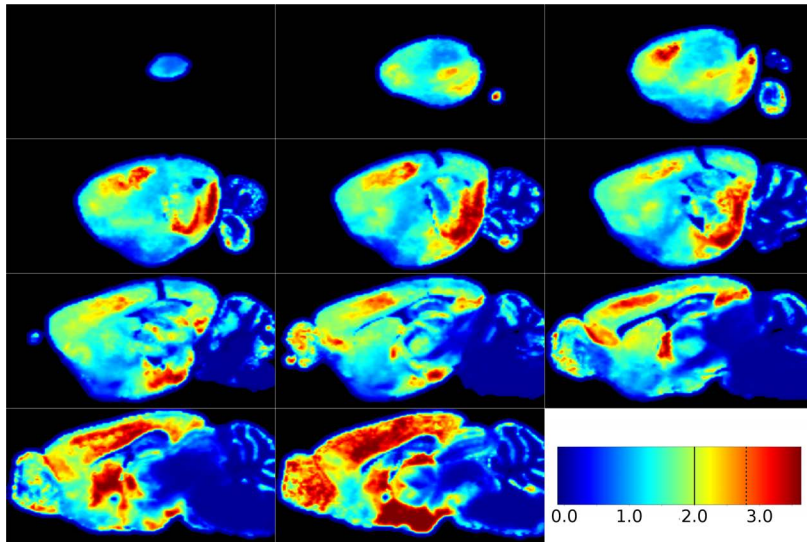

B

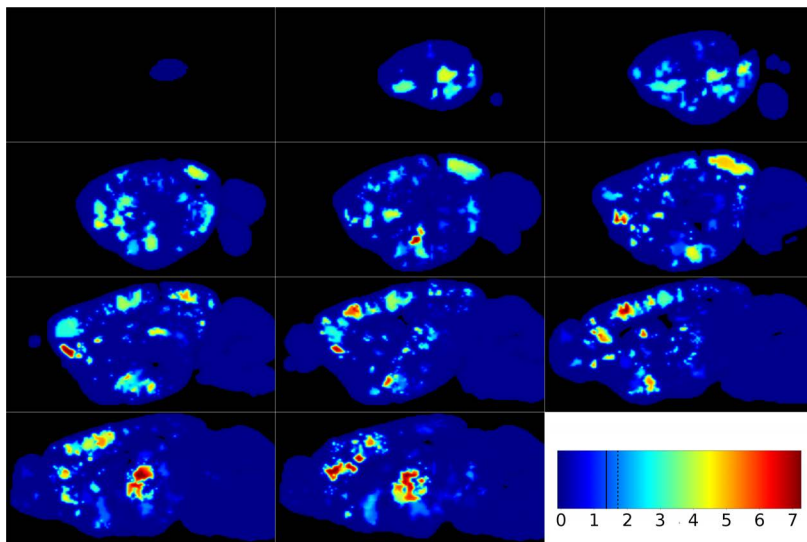

C



0 -log10(pvalue) 10

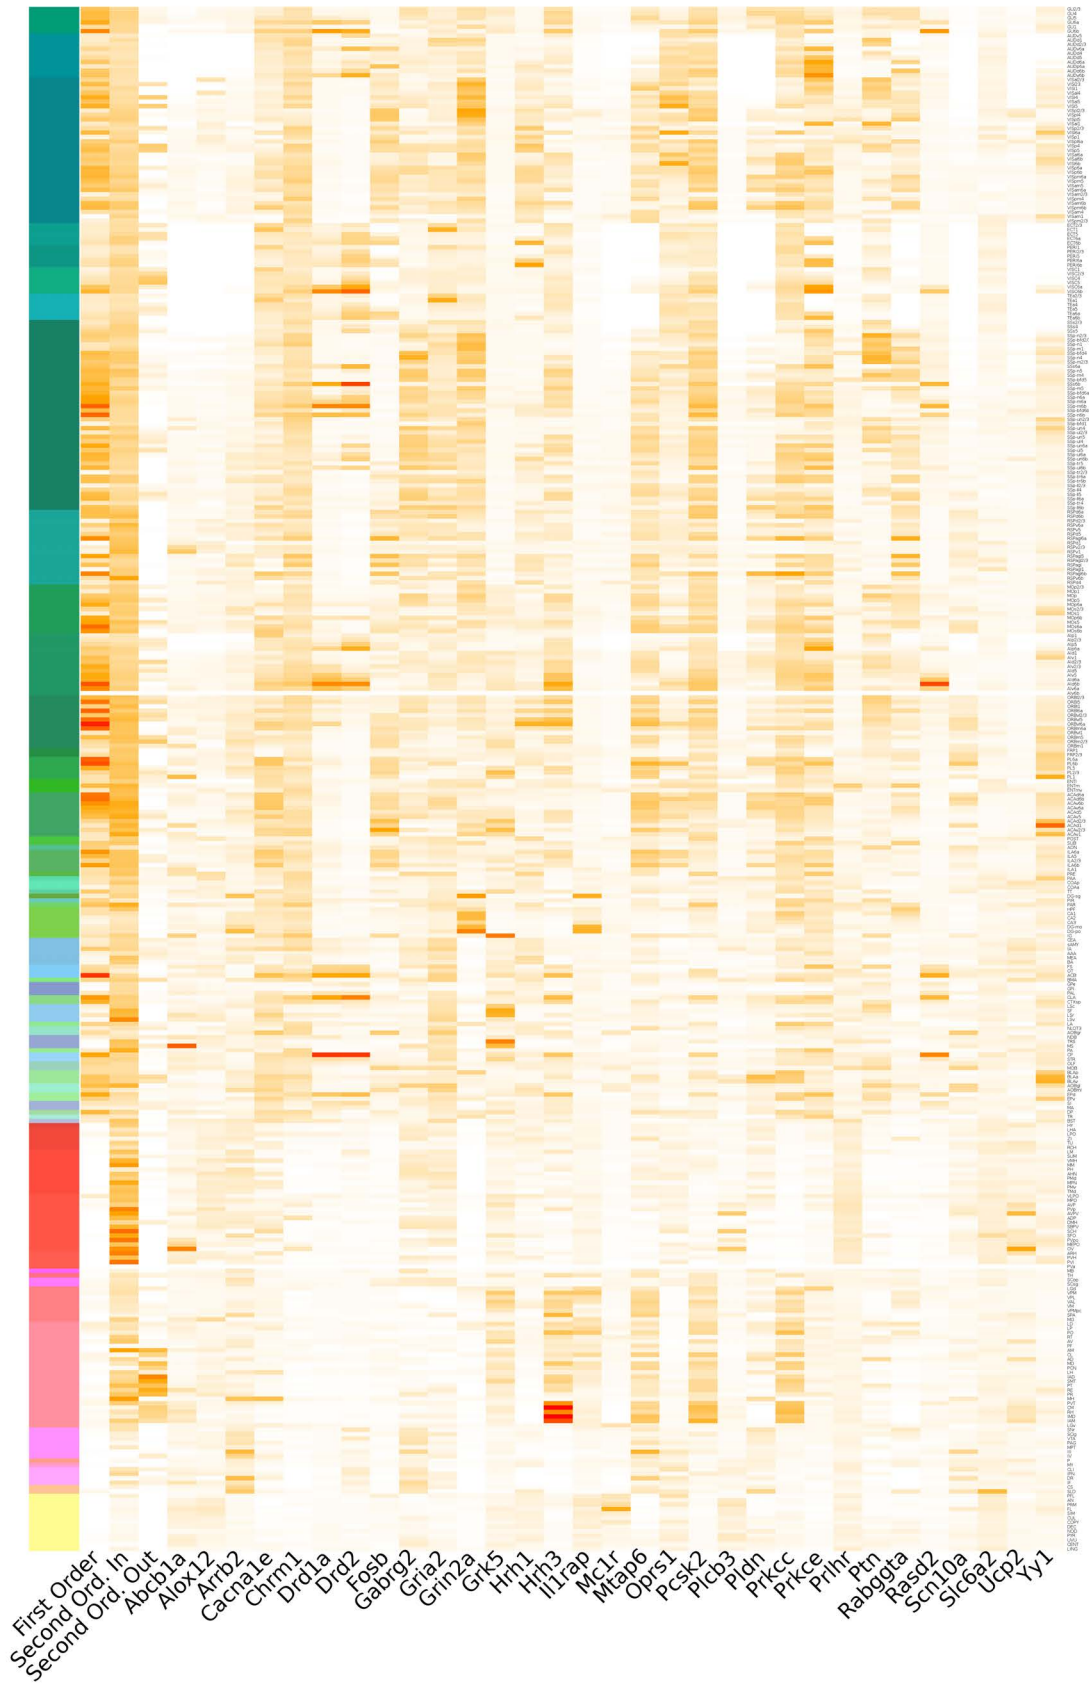

D

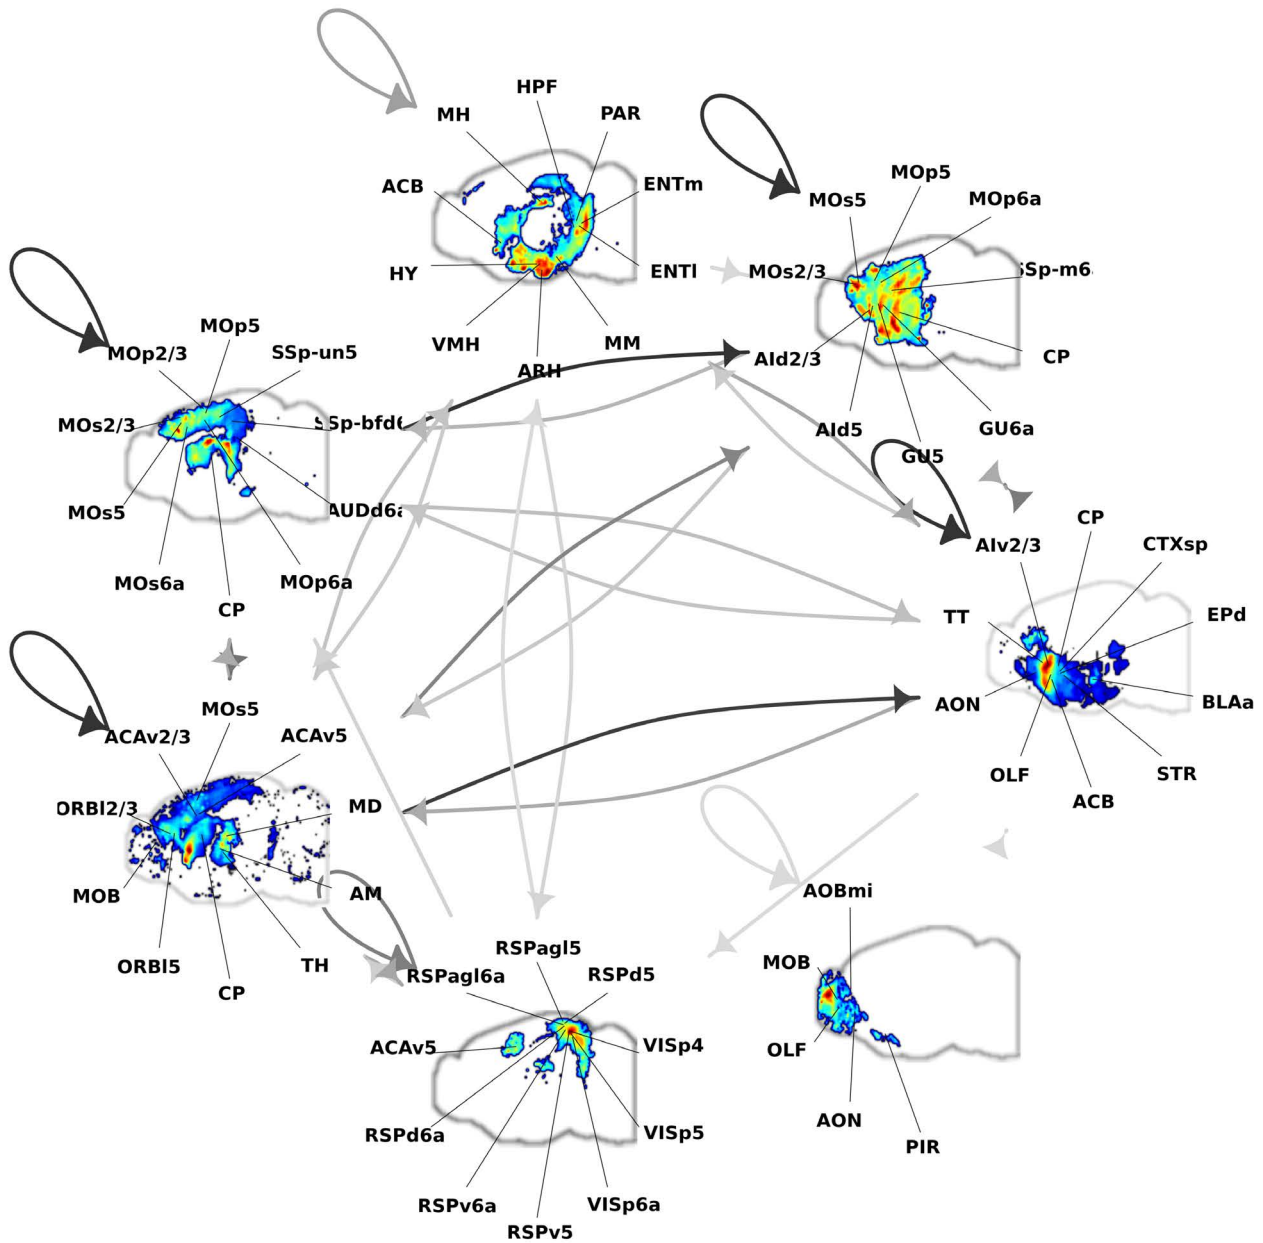

E

**Supplementary Data 3 Case 13. Analgesia (up-regulated) gene-set of pain QTLs.** (A) Slice-view of first order network measures given as  $-\log_{10}$  scaled p-values. (B) Slice-view of second order network measures (incoming node strength) given as  $-\log_{10}$  scaled p-values. (C) Slice-view of second order network measures (outgoing node strength) given as  $-\log_{10}$  scaled p-values. (D) Heatmap of average log-scaled p-values of first and second order effects as well as single gene effects. (E) Clustered network graph. Clusters of significant brain regions (FDR=0.05) with similar connectivity and their structural connectivity (normalized by the injection volume) given as grey-scale arrows.



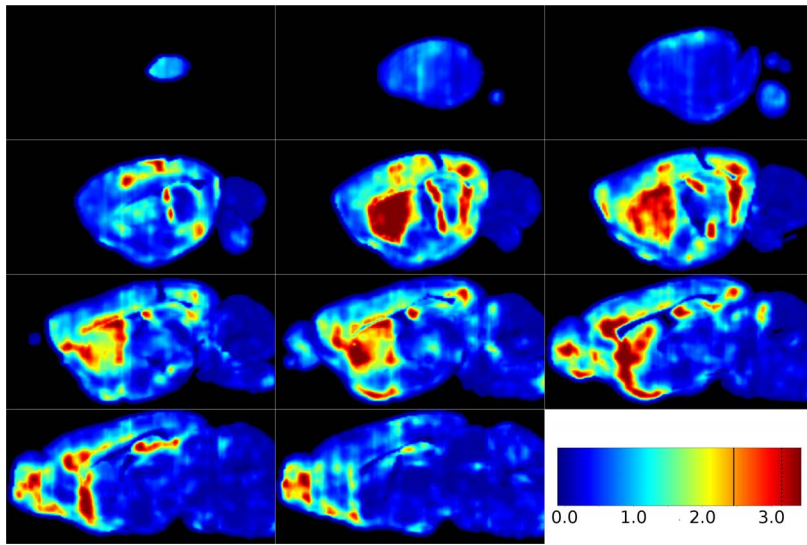

A

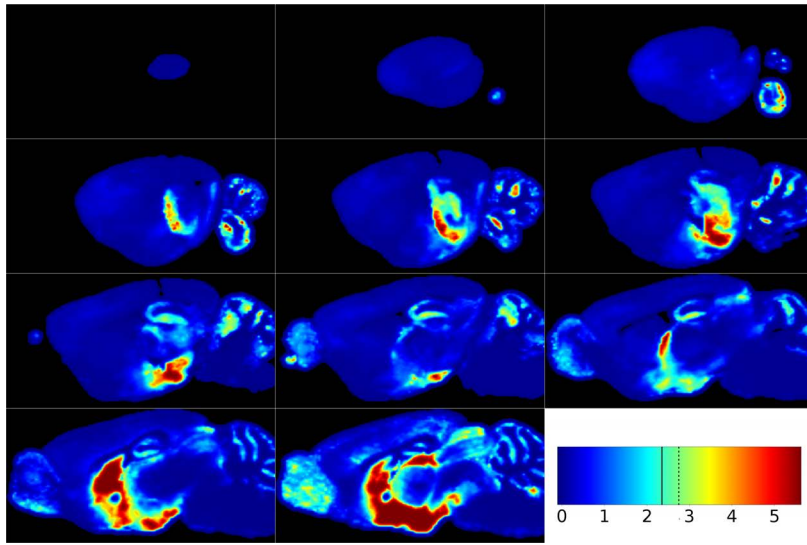

B

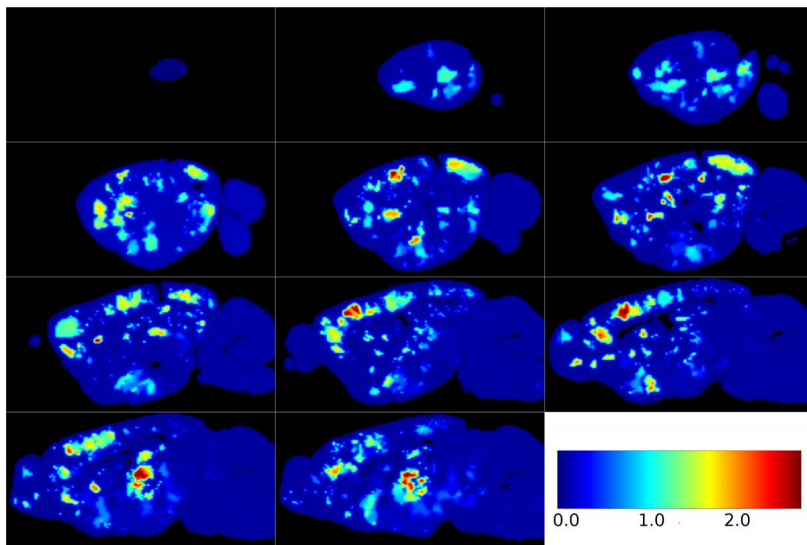

C



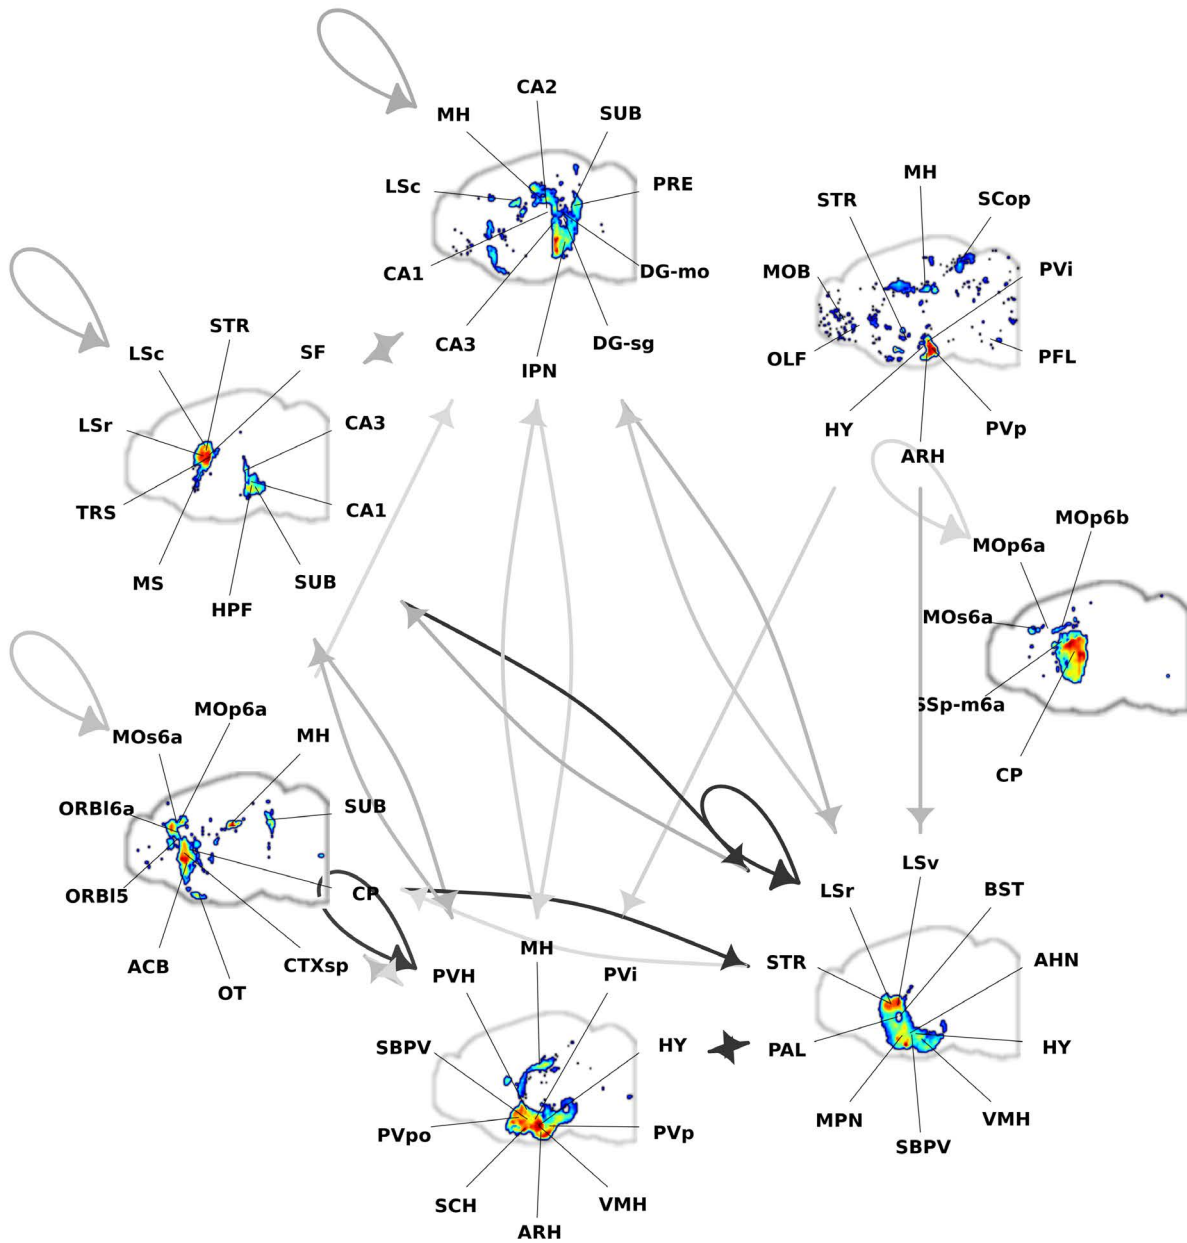

E

**Supplementary Data 3 Case 14. Hypersensitivity (up-regulated) gene-set of pain QTLs.** (A) Slice-view of first order network measures given as  $-\log_{10}$  scaled p-values. (B) Slice-view of second order network measures (incoming node strength) given as  $-\log_{10}$  scaled p-values. (C) Slice-view of second order network measures (outgoing node strength) given as  $-\log_{10}$  scaled p-values. (D) Heatmap of average log-scaled p-values of first and second order effects as well as single gene effects. (E) Clustered network graph. Clusters of significant brain regions (FDR=0.05) with similar connectivity and their structural connectivity (normalized by the injection volume) given as grey-scale arrows.

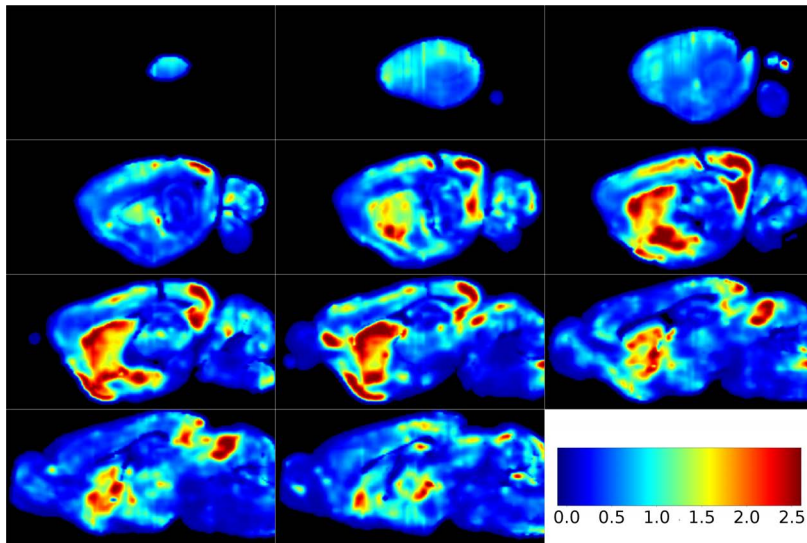

A

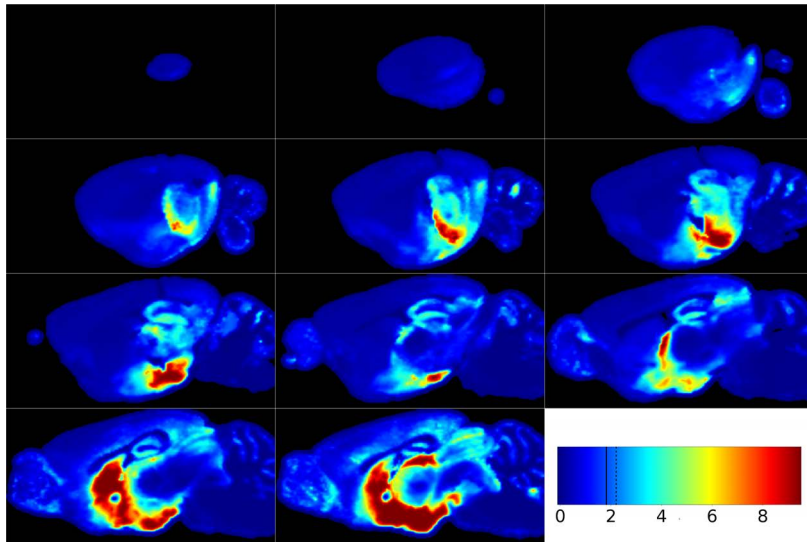

B

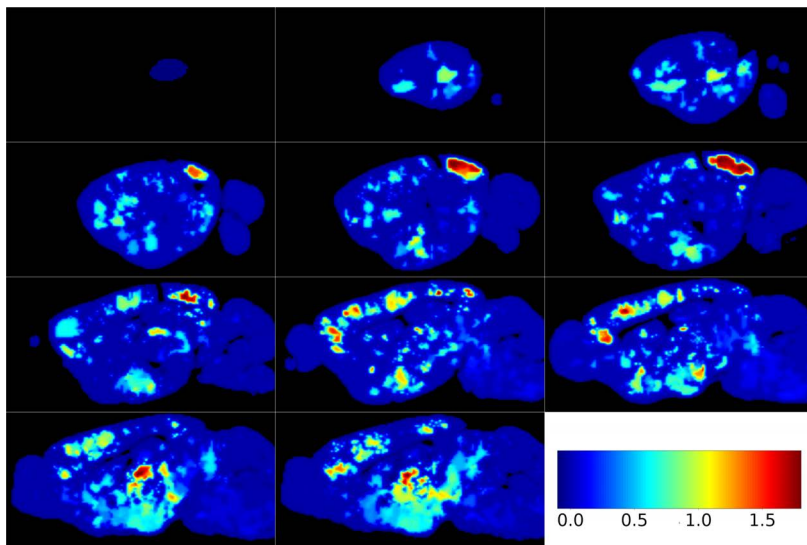

C



0 -log<sub>10</sub>(pvalue) 10

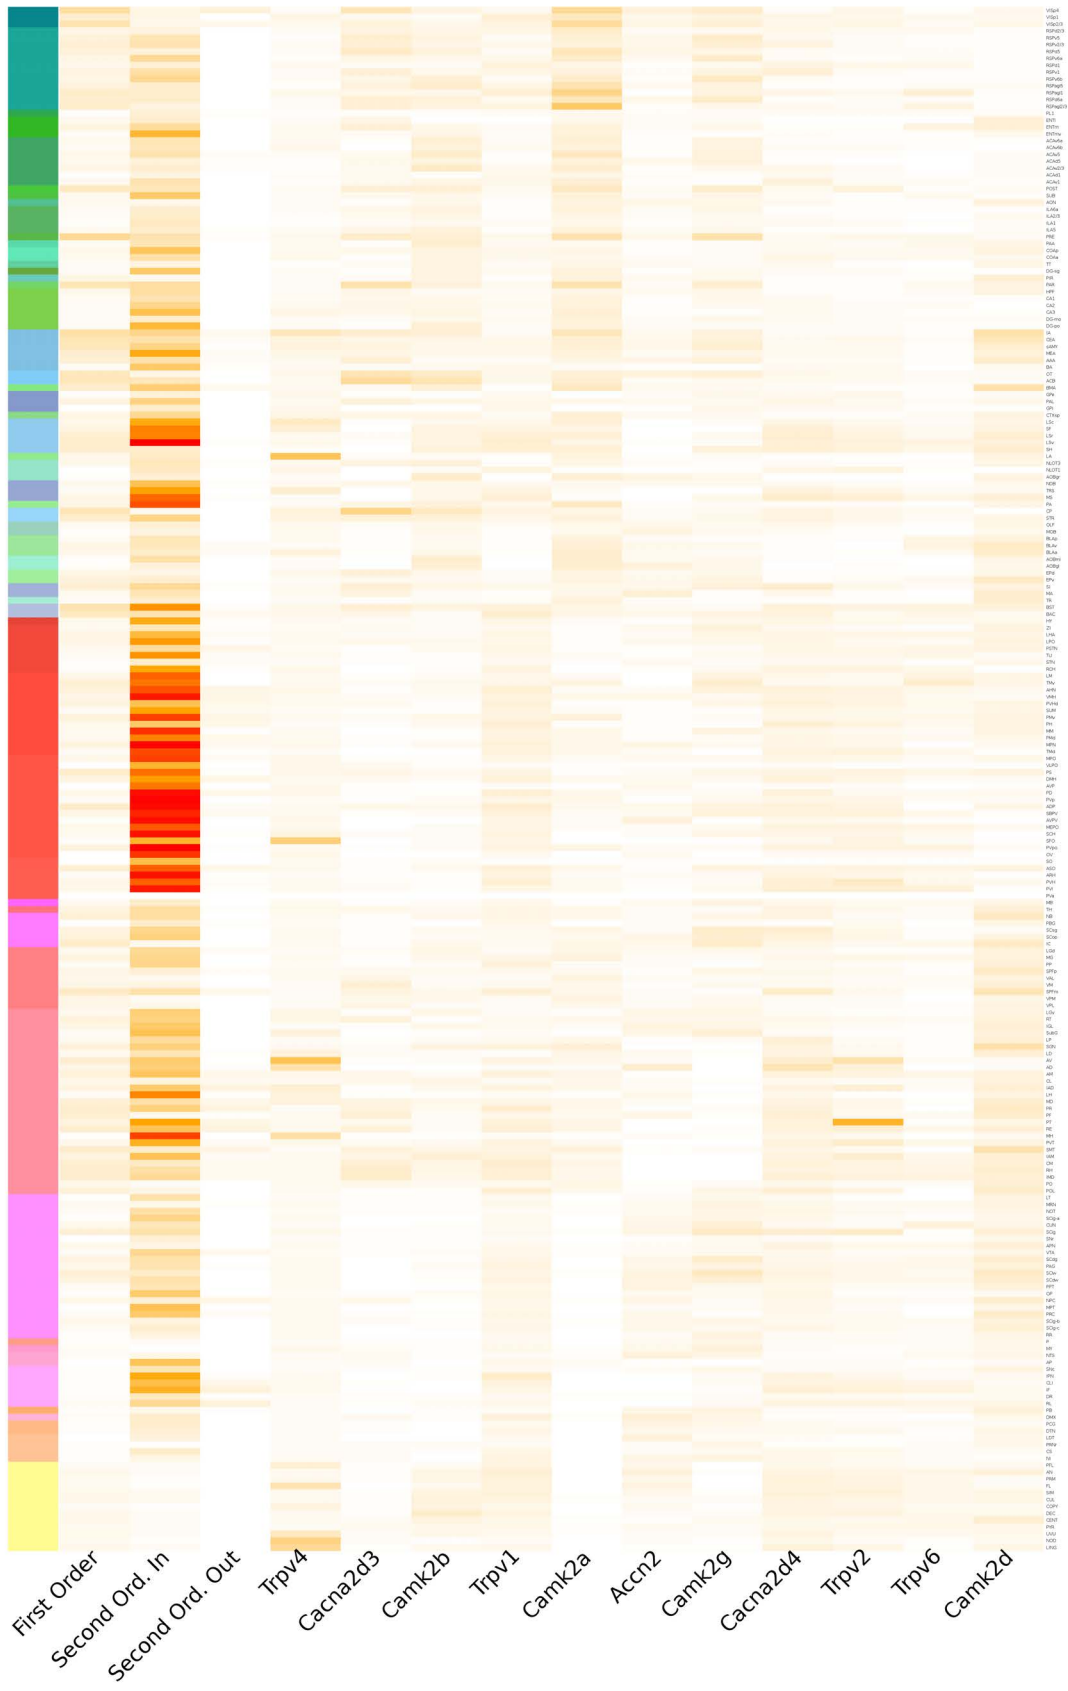

D



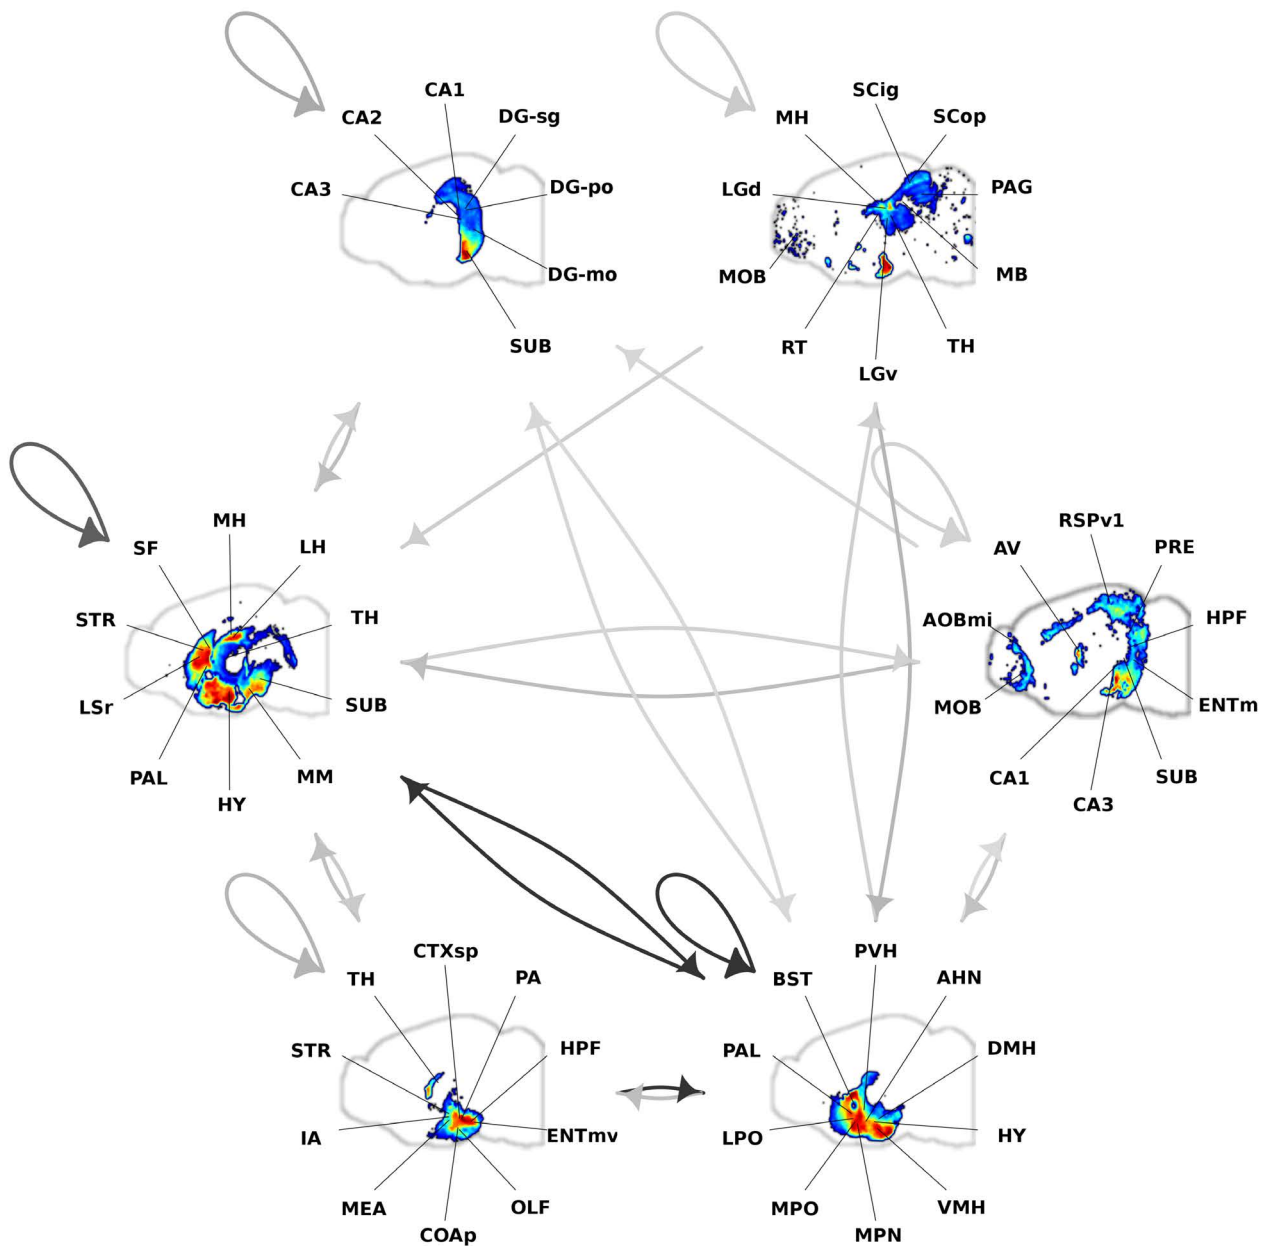

E

**Supplementary Data 3 Case 15. Calcium signaling gene-set of pain QTLs.** (A) Slice-view of first order network measures given as  $-\log_{10}$  scaled p-values. (B) Slice-view of second order network measures (incoming node strength) given as  $-\log_{10}$  scaled p-values. (C) Slice-view of second order network measures (outgoing node strength) given as  $-\log_{10}$  scaled p-values. (D) Heatmap of average log-scaled p-values of first and second order effects as well as single gene effects. (E) Clustered network graph. Clusters of significant brain regions (FDR=0.05) with similar connectivity and their structural connectivity (normalized by the injection volume) given as grey-scale arrows.

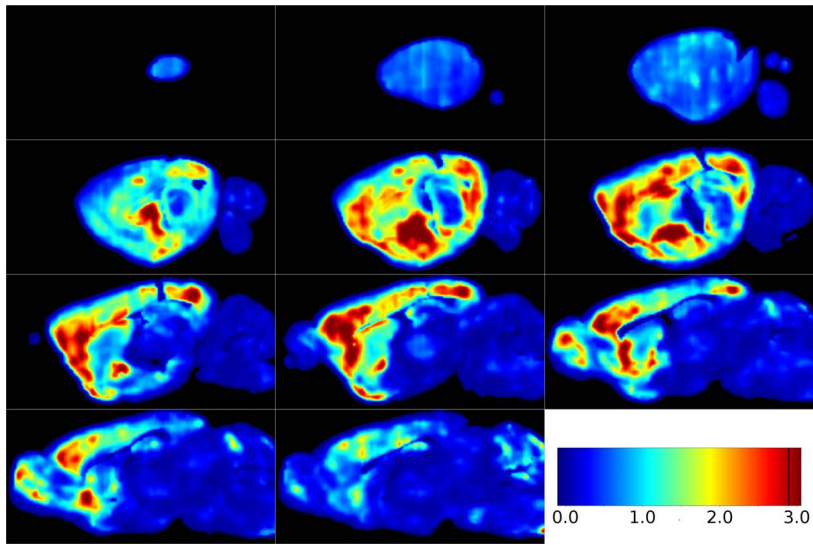

A

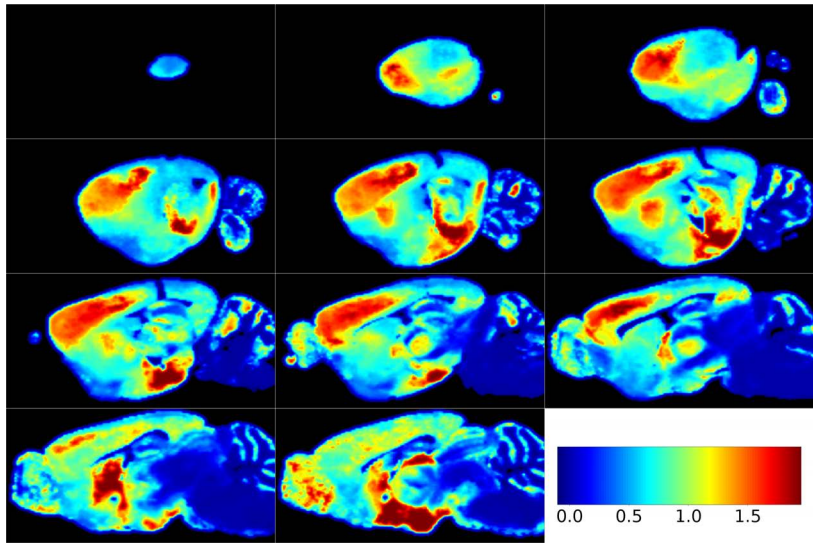

B

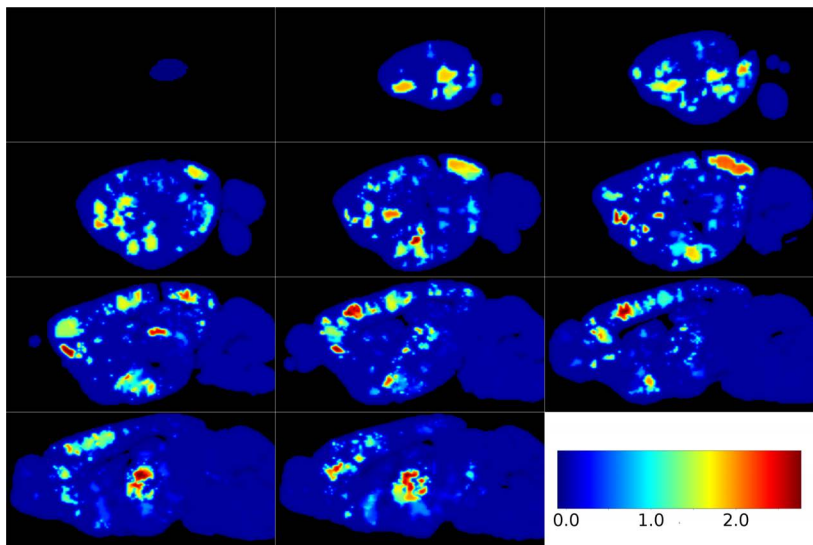

C

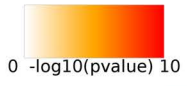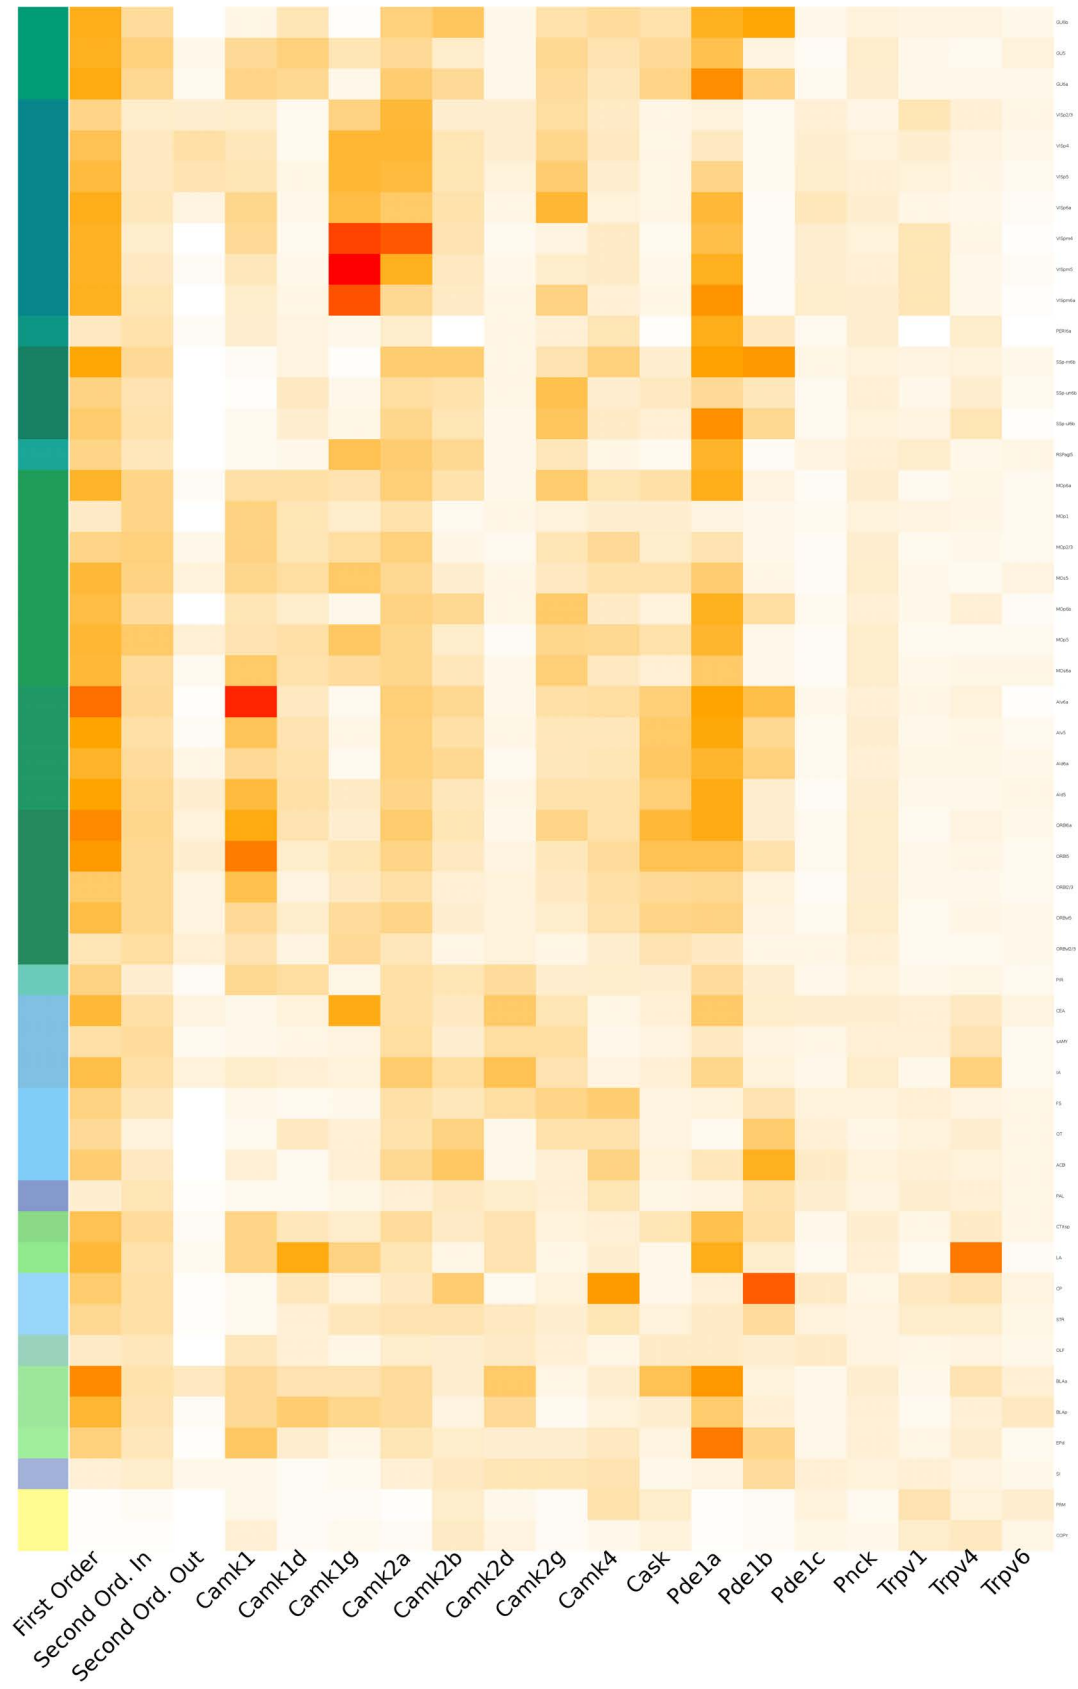

D

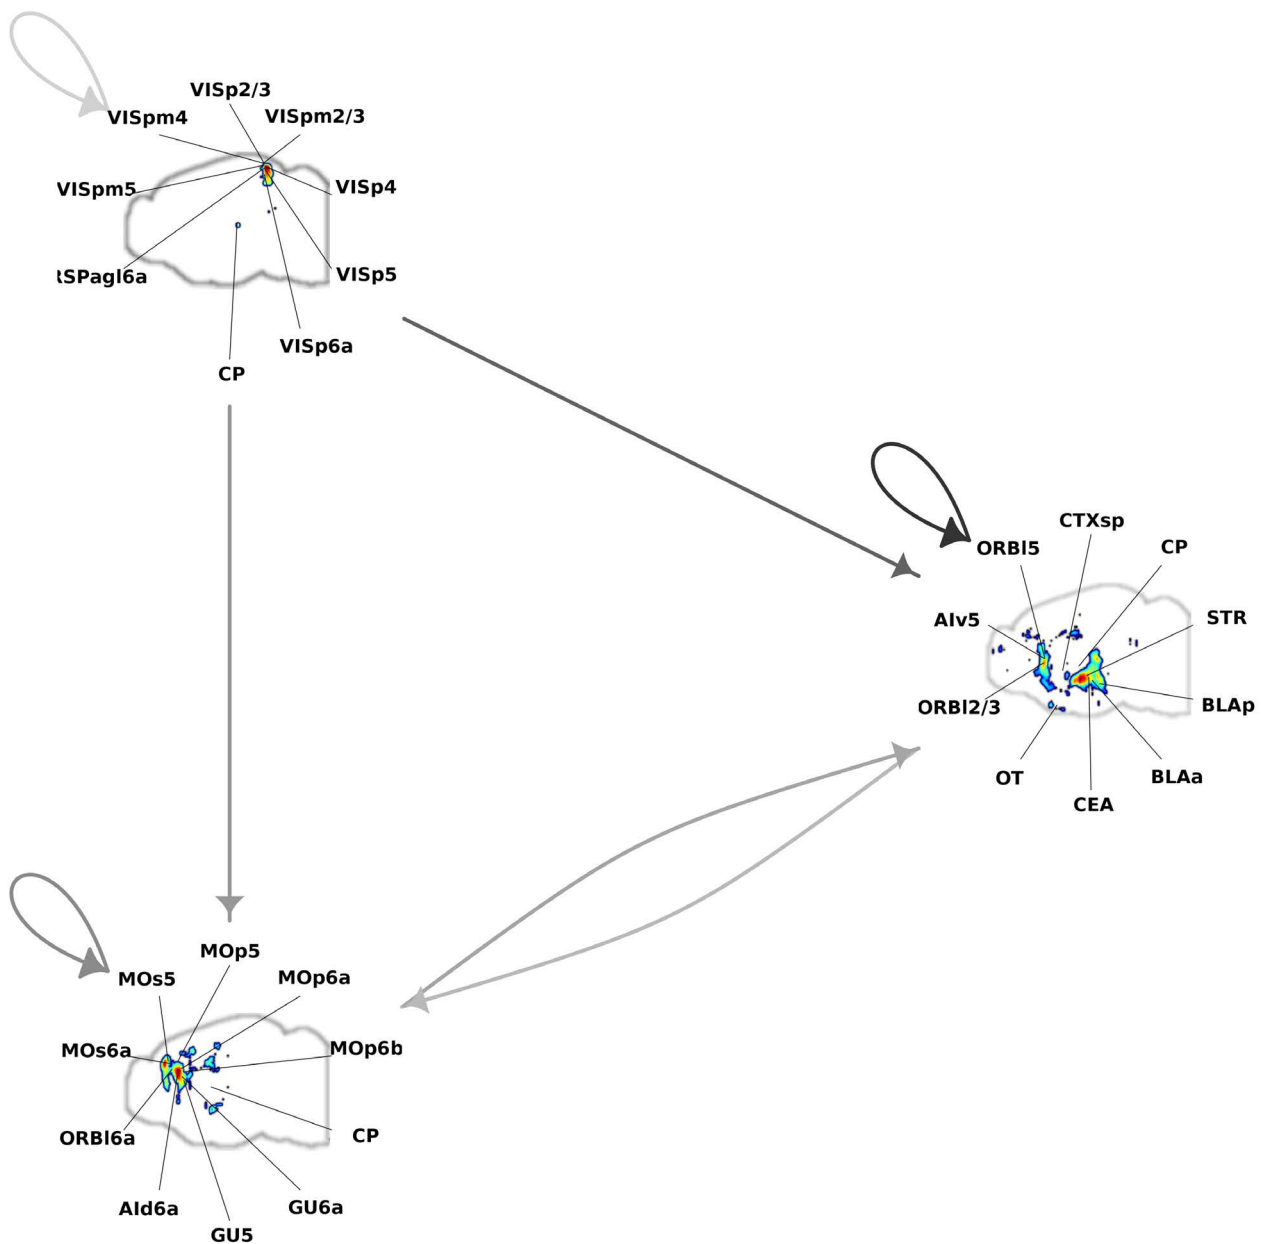

E

**Supplementary Data 3 Case 16. Calmodulin binding gene-set of pain QTLs.** (A) Slice-view of first order network measures given as  $-\log_{10}$  scaled p-values. (B) Slice-view of second order network measures (incoming node strength) given as  $-\log_{10}$  scaled p-values. (C) Slice-view of second order network measures (outgoing node strength) given as  $-\log_{10}$  scaled p-values. (D) Heatmap of average log-scaled p-values of first and second order effects as well as single gene effects. (E) Clustered network graph. Clusters of significant brain regions (FDR=0.1) with similar connectivity and their structural connectivity (normalized by the injection volume) given as grey-scale arrows.

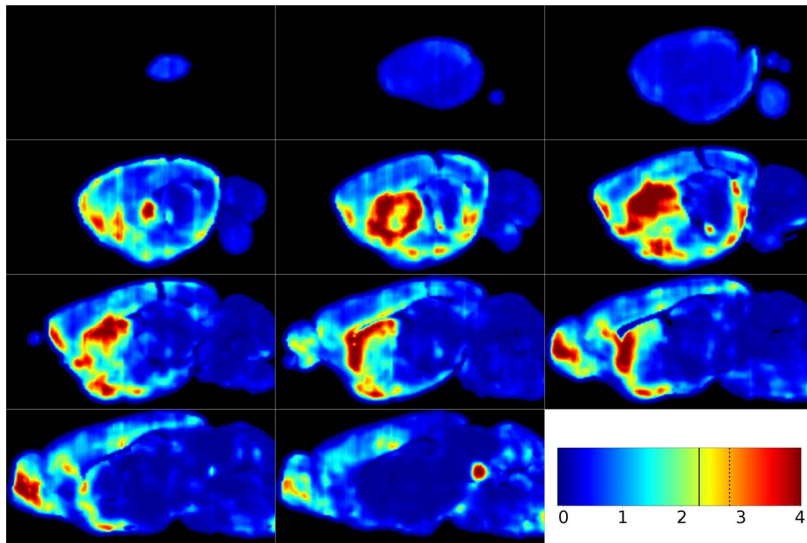

A

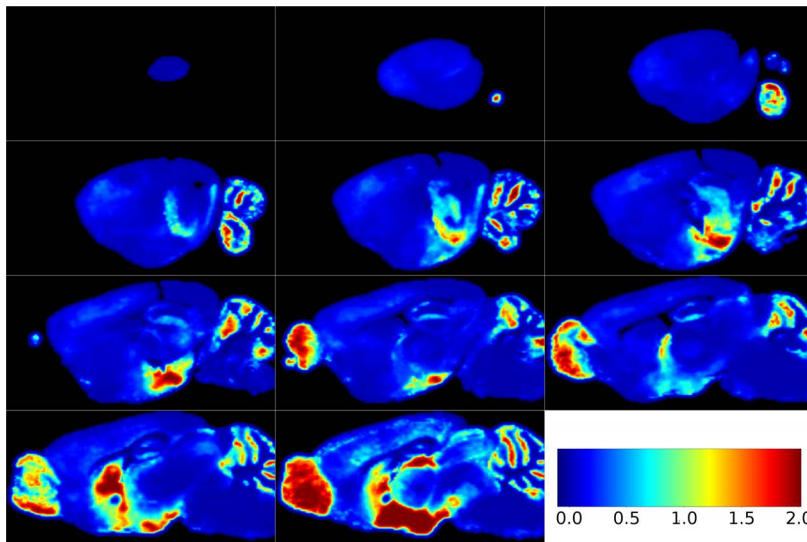

B

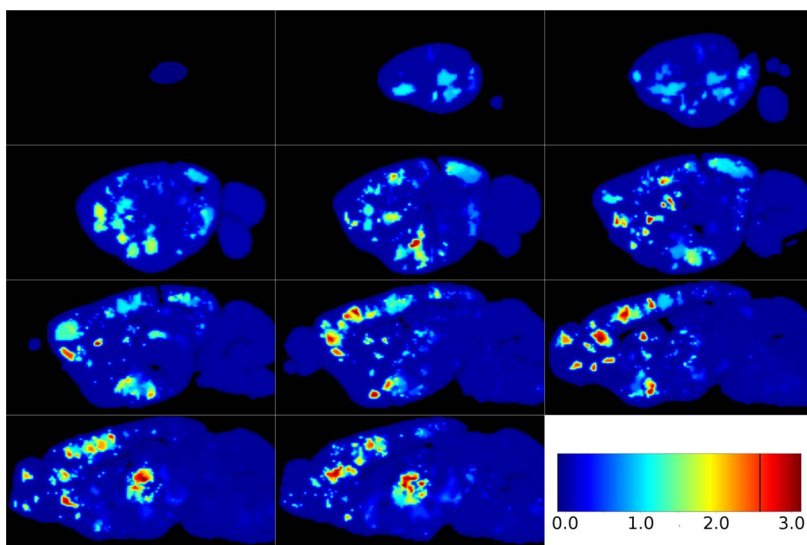

C





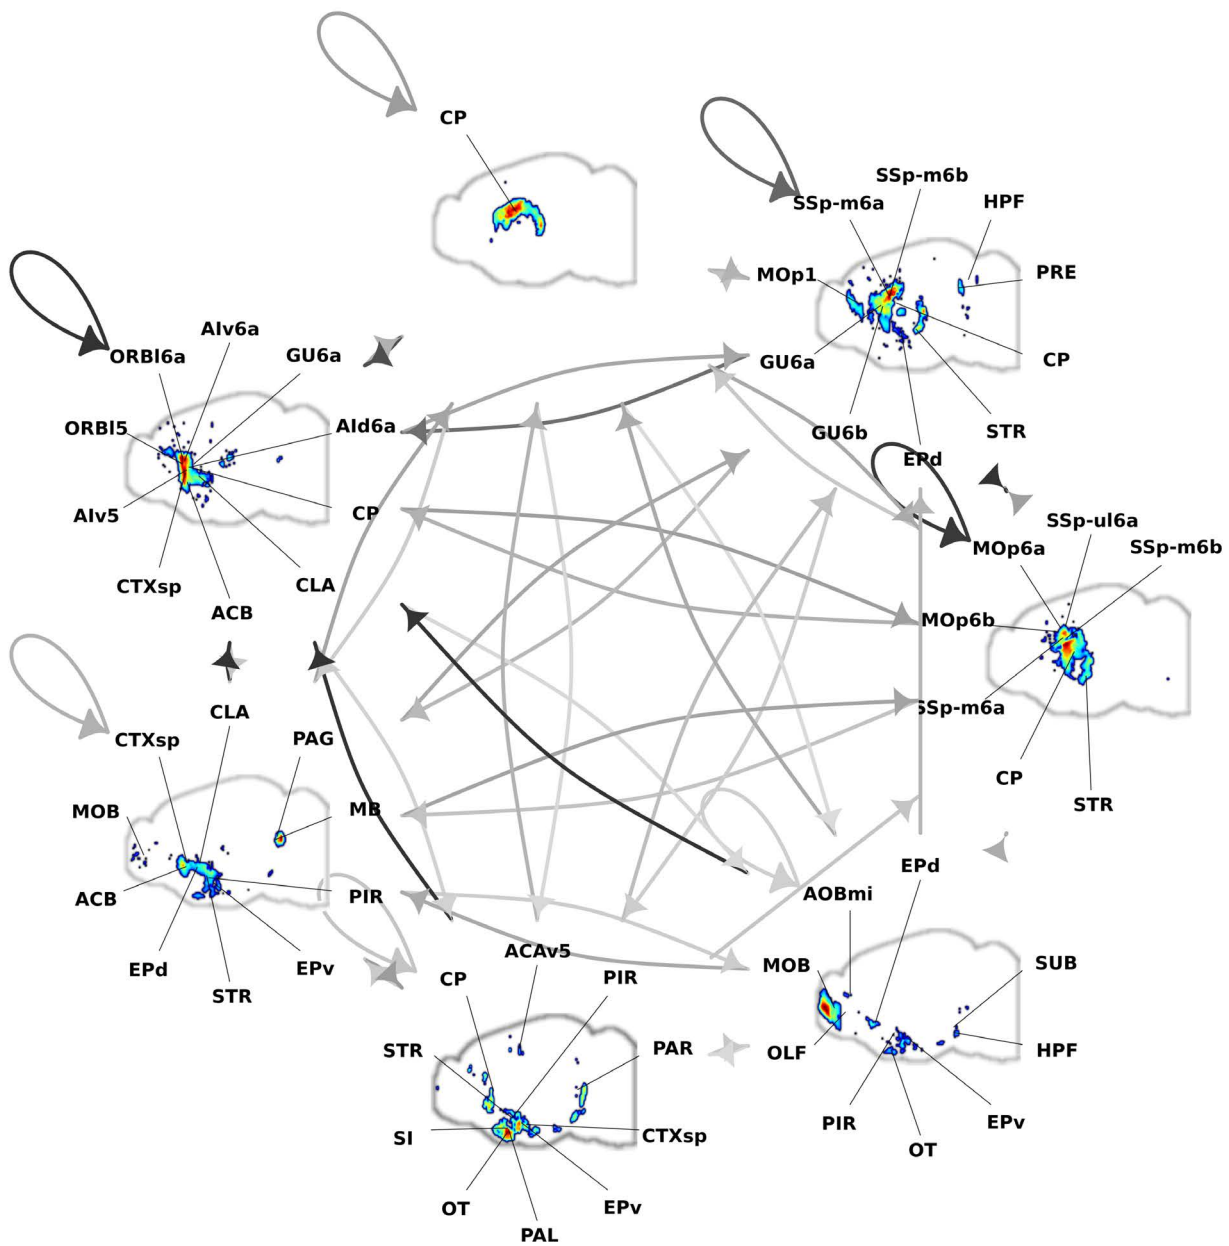

E

**Supplementary Data 3 Case 17. Panic disorder gene-set of the fear-QTLs.** (A) Slice-view of first order network measures given as  $-\log_{10}$  scaled p-values. (B) Slice-view of second order network measures (incoming node strength) given as  $-\log_{10}$  scaled p-values. (C) Slice-view of second order network measures (outgoing node strength) given as  $-\log_{10}$  scaled p-values. (D) Heatmap of average log-scaled p-values of first and second order effects as well as single gene effects. (E) Clustered network graph. Clusters of significant brain regions (FDR=0.05) with similar connectivity and their structural connectivity (normalized by the injection volume) given as grey-scale arrows.

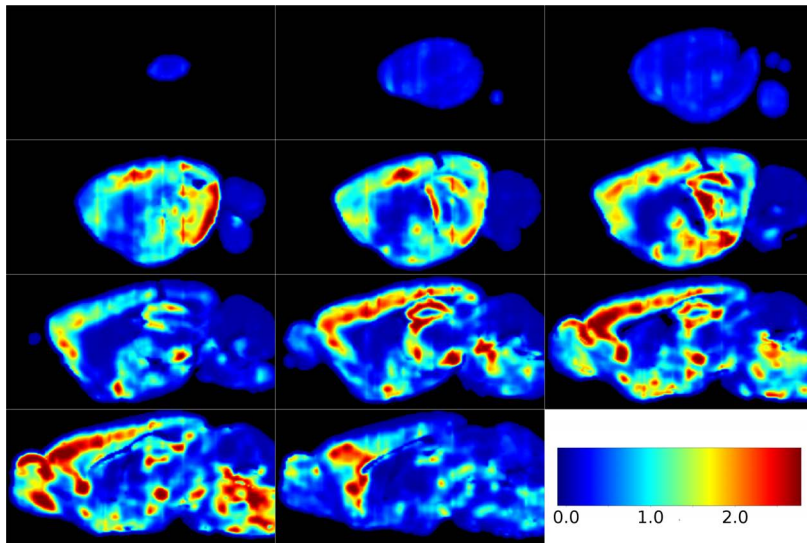

A

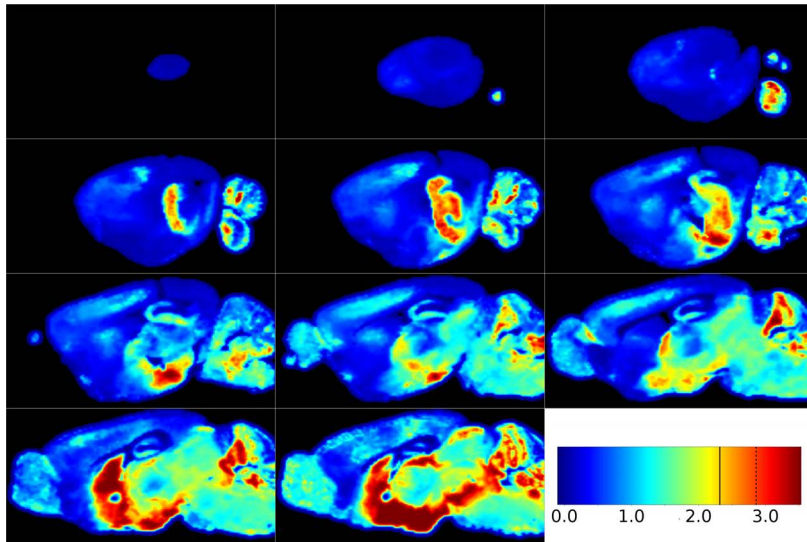

B

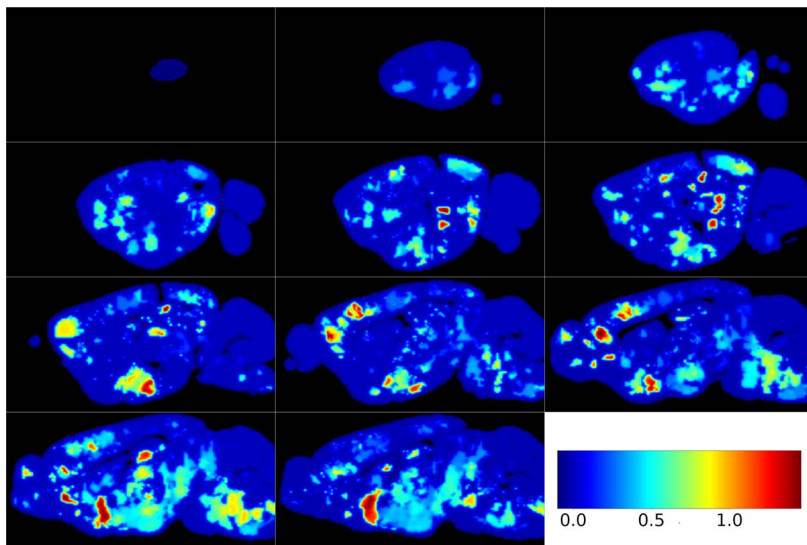

C

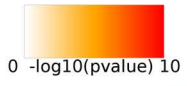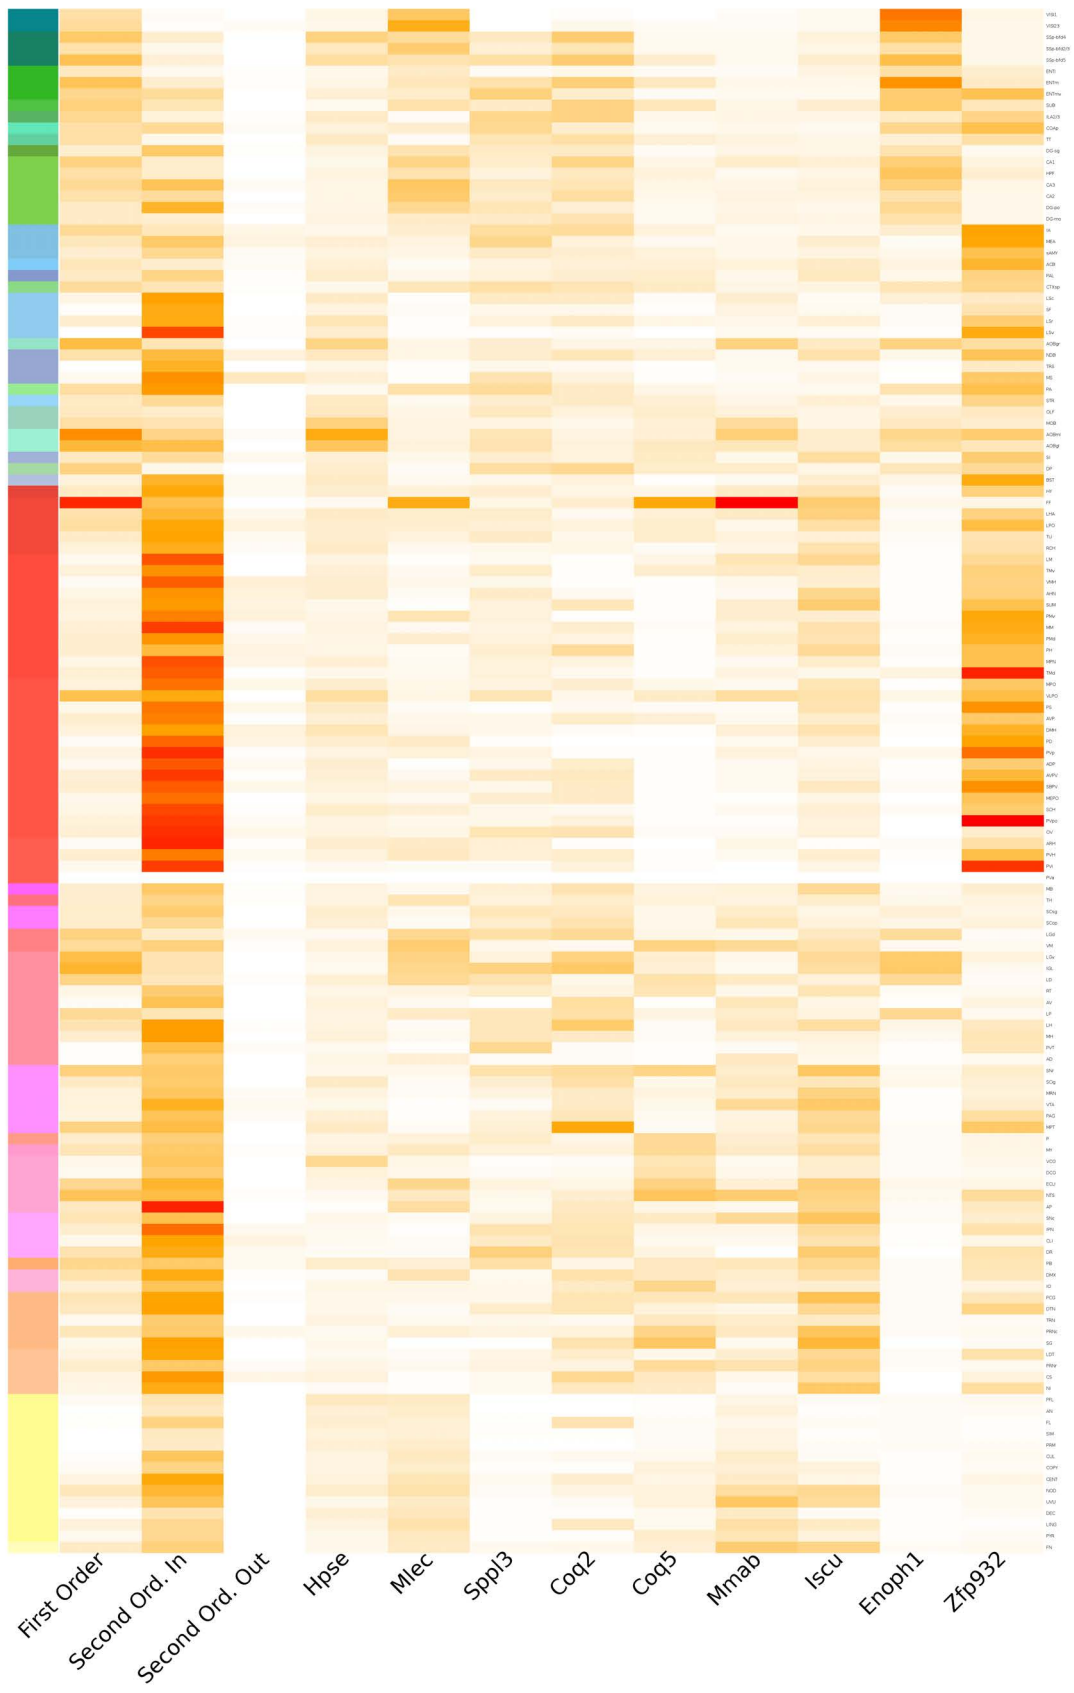

D





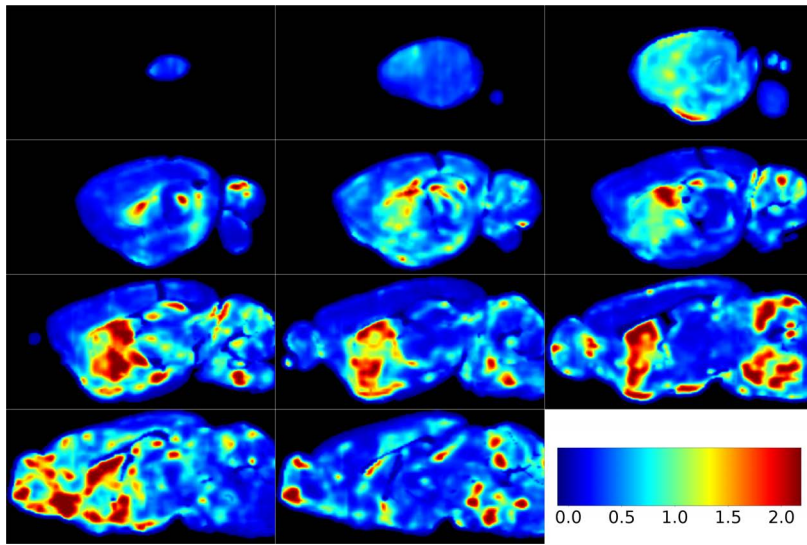

A

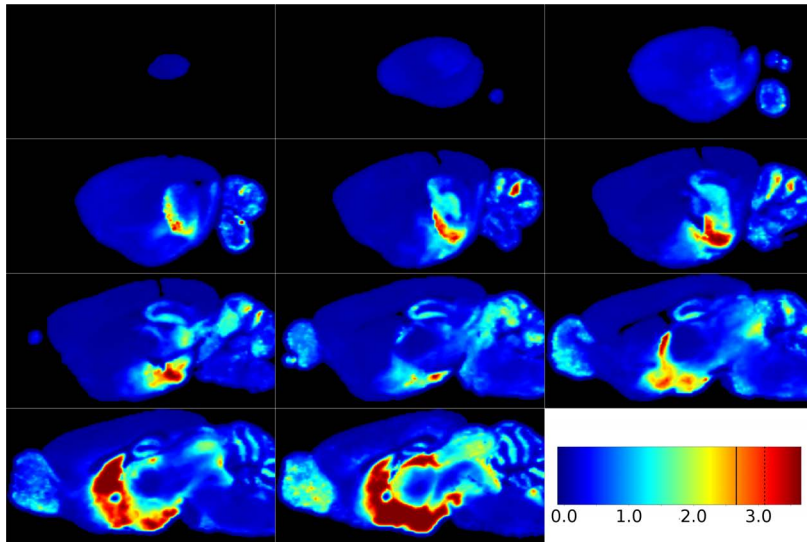

B

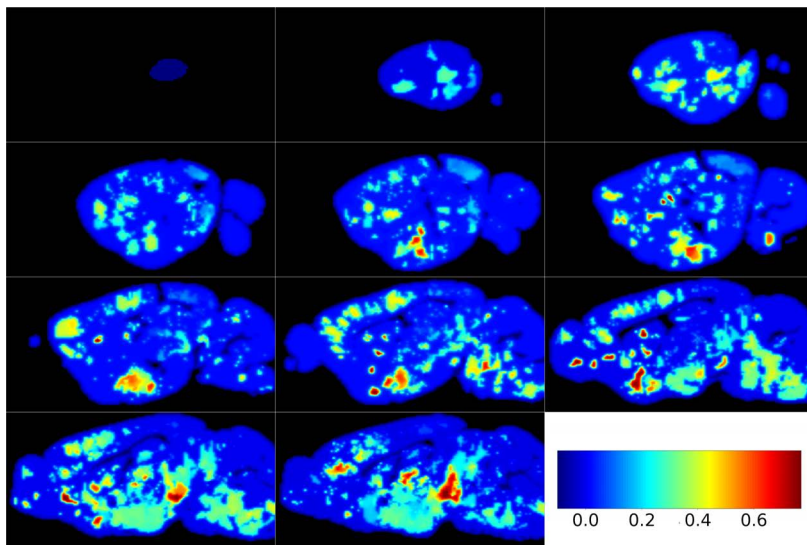

C

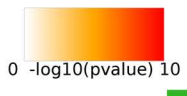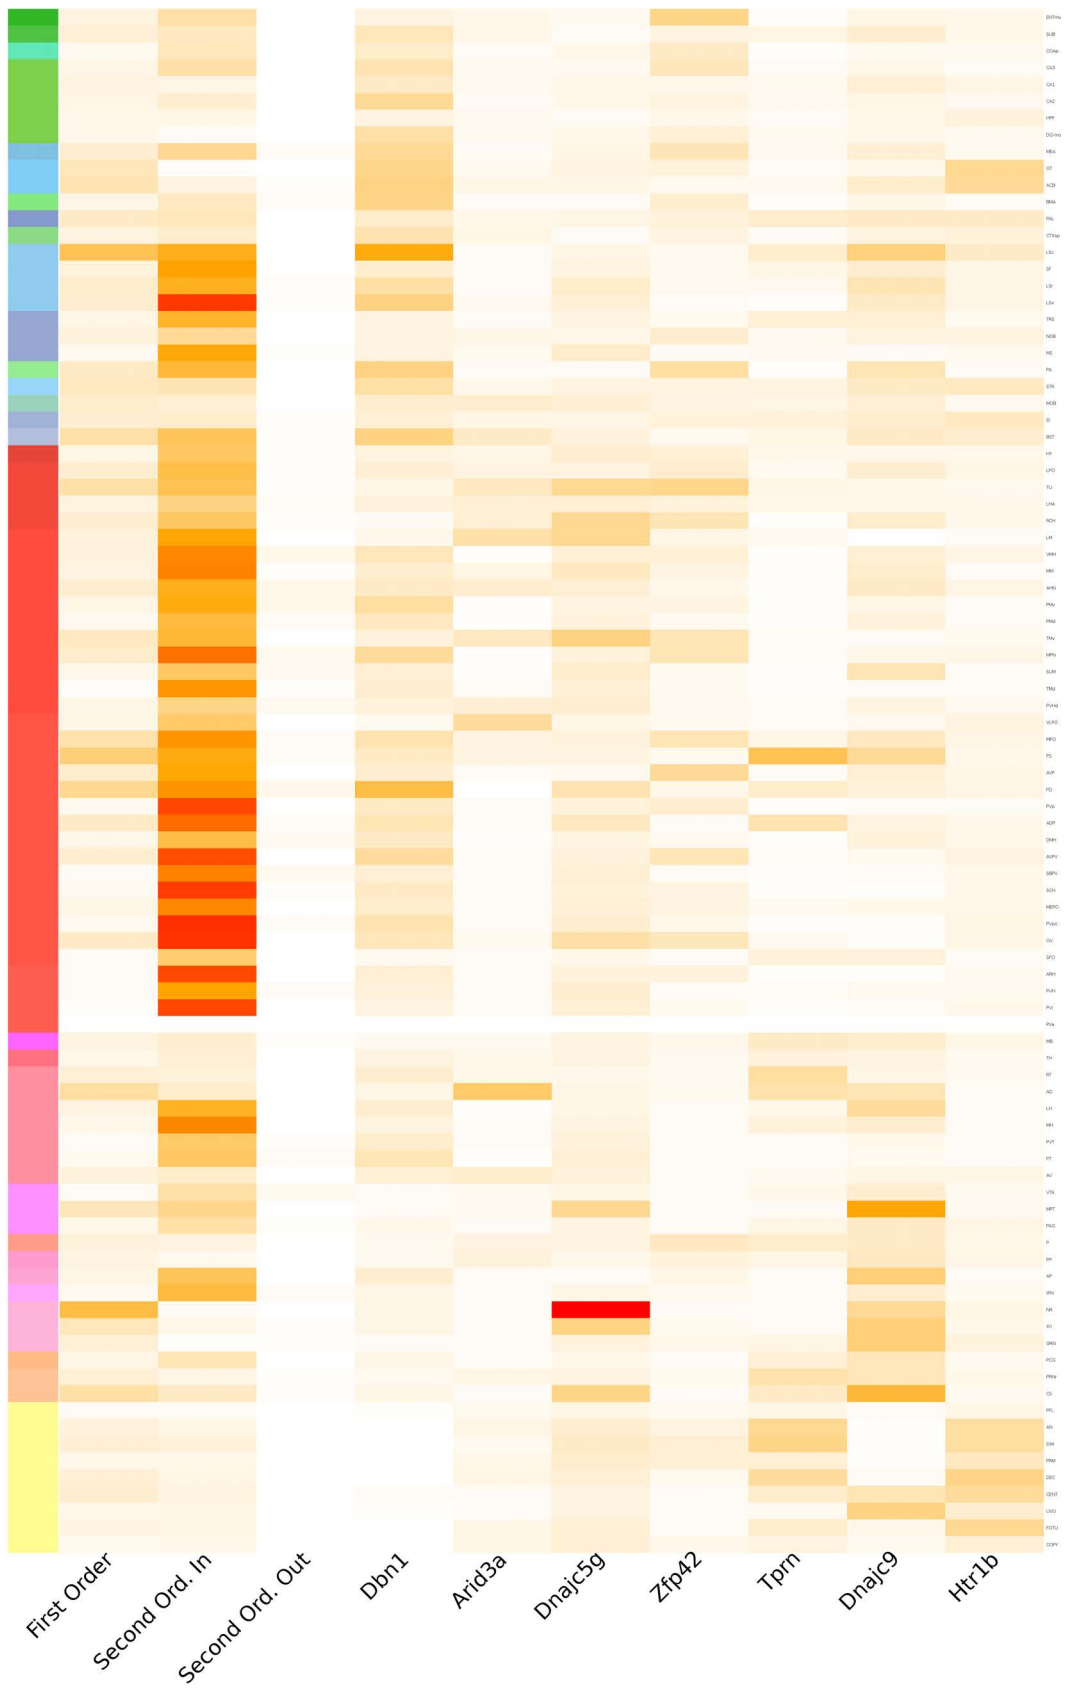

D

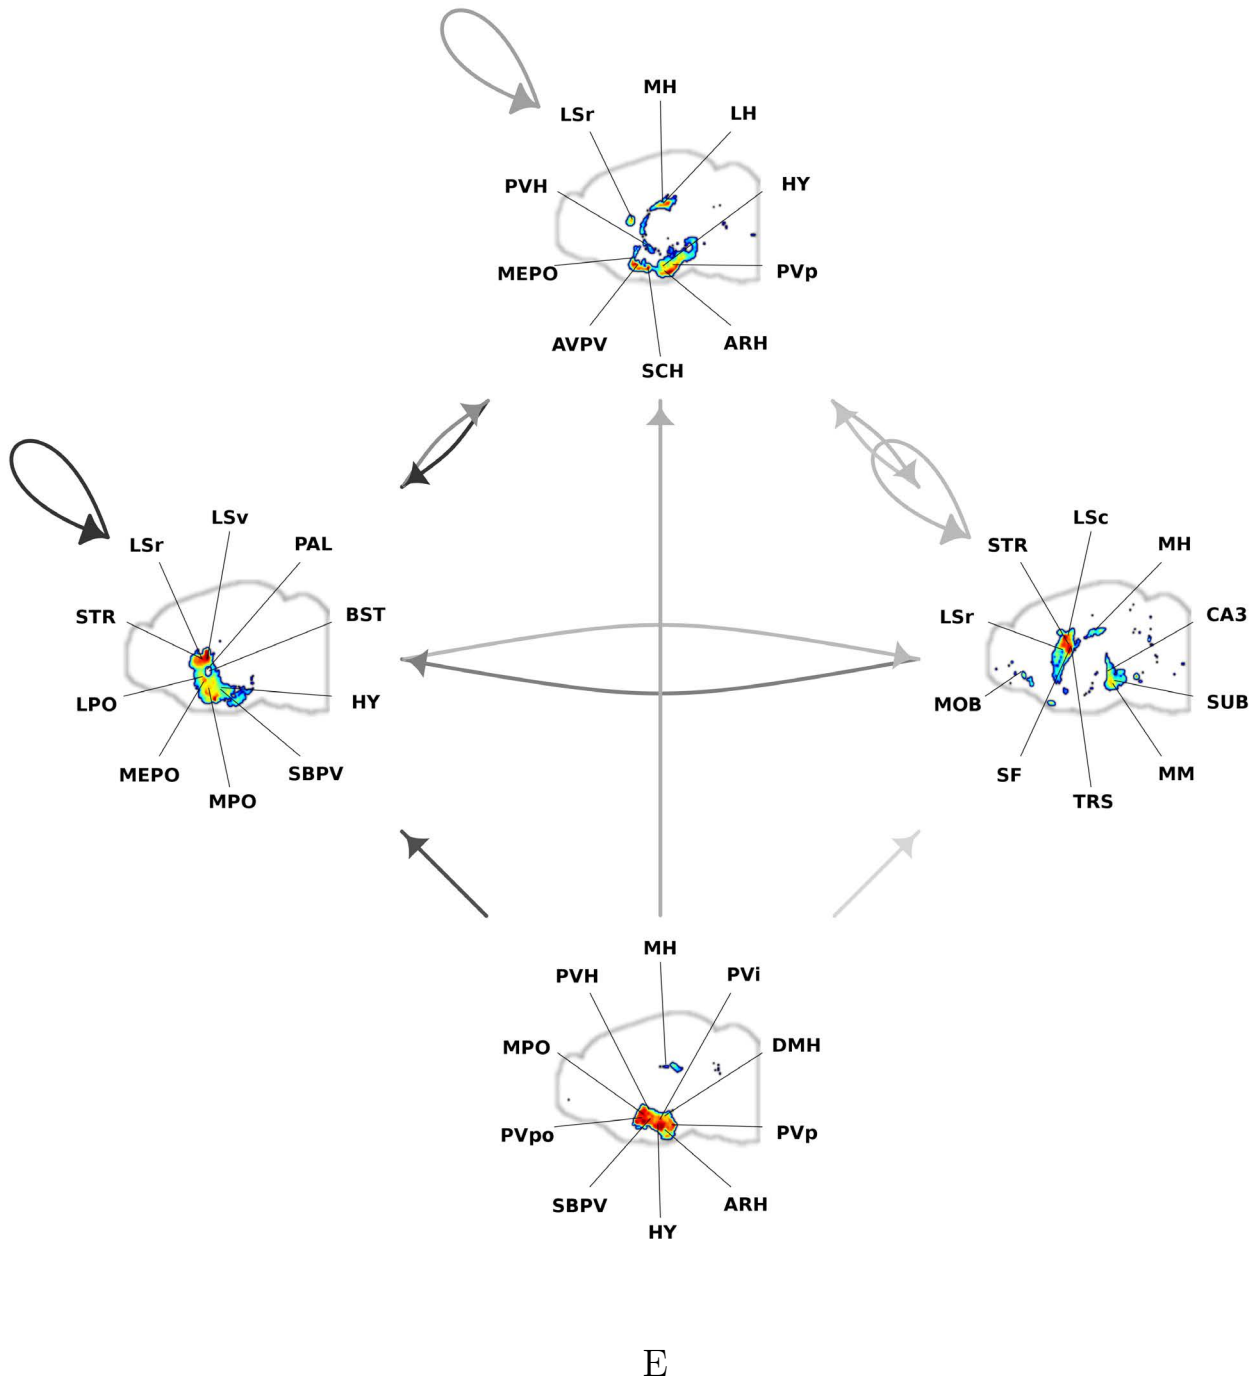

**Supplementary Data 3 Case 19. Decreased anxiety gene-set of the fear-QTLs.** (A) Slice-view of first order network measures given as  $-\log_{10}$  scaled p-values. (B) Slice-view of second order network measures (incoming node strength) given as  $-\log_{10}$  scaled p-values. (C) Slice-view of second order network measures (outgoing node strength) given as  $-\log_{10}$  scaled p-values. (D) Heatmap of average log-scaled p-values of first and second order effects as well as single gene effects. (E) Clusters of significant brain regions (FDR=0.1) with similar connectivity and their structural connectivity (normalized by the injection volume) given as grey-scale arrows.

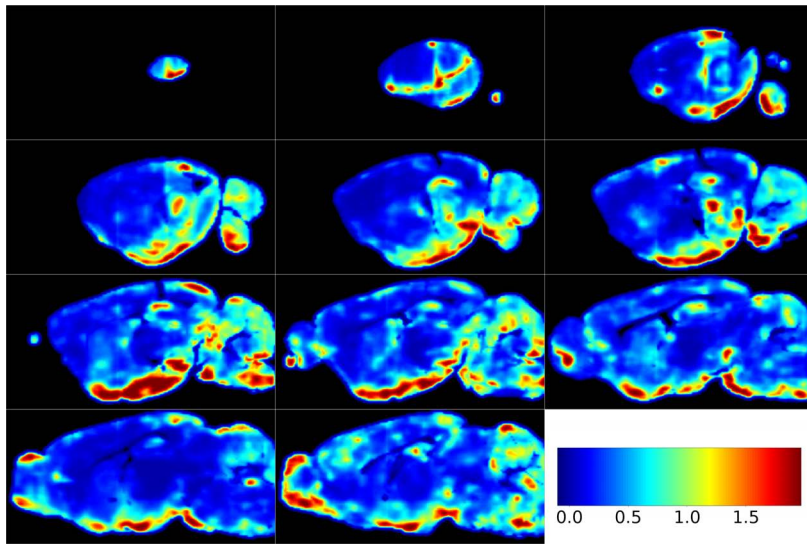

A

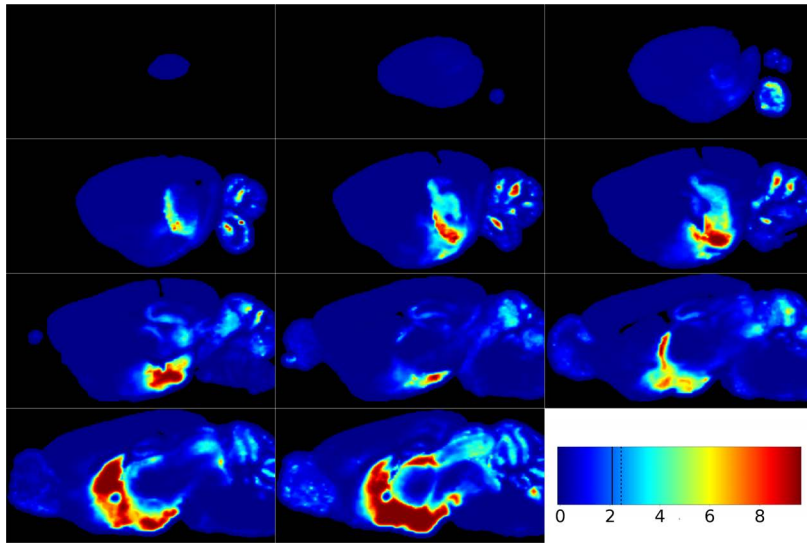

B

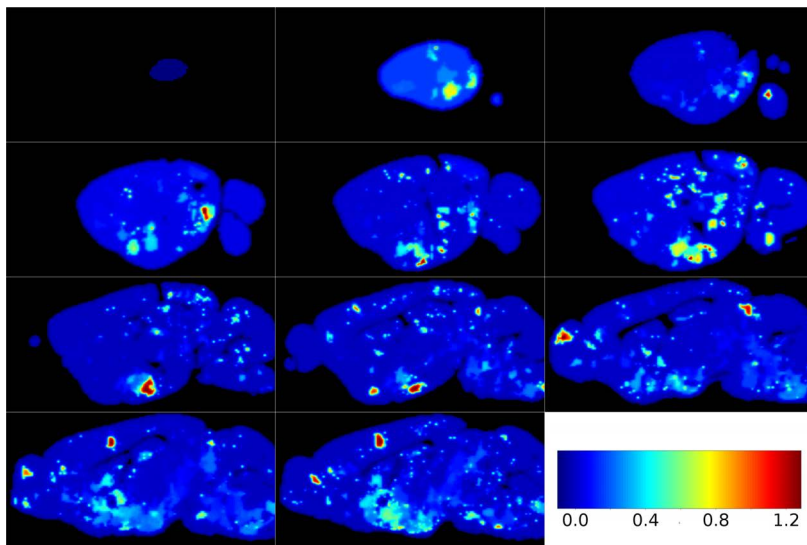

C

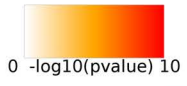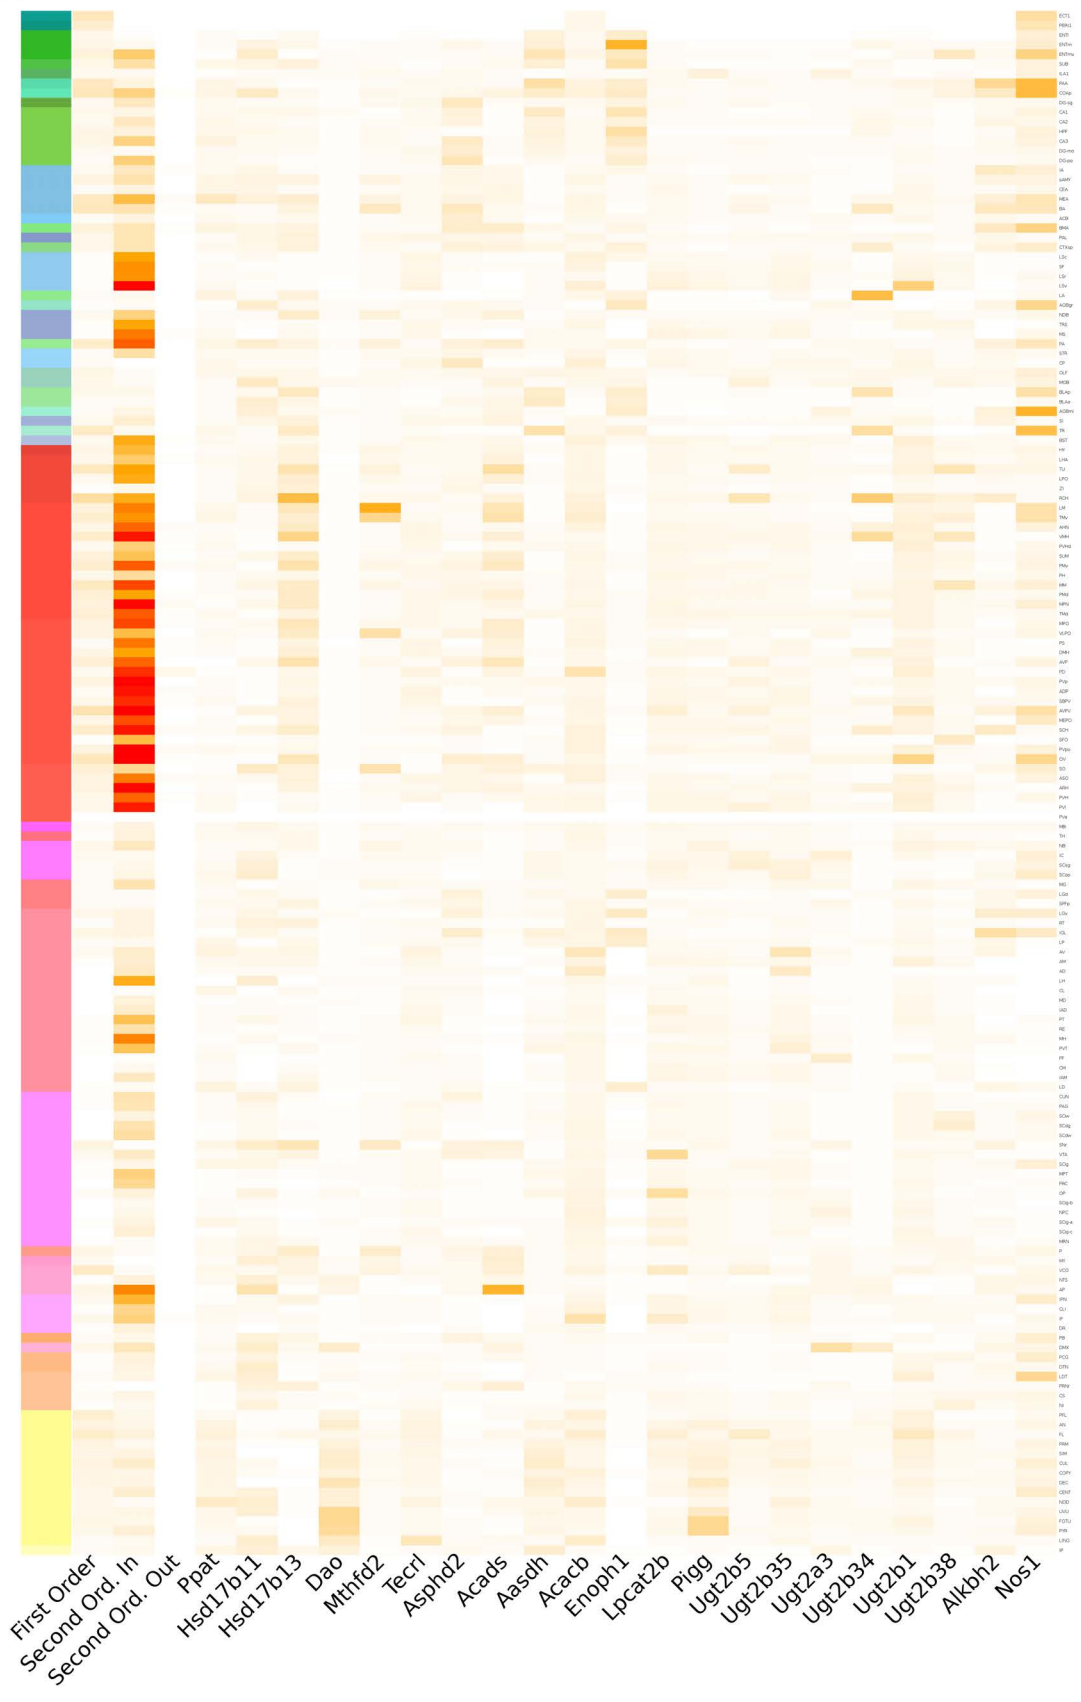

D





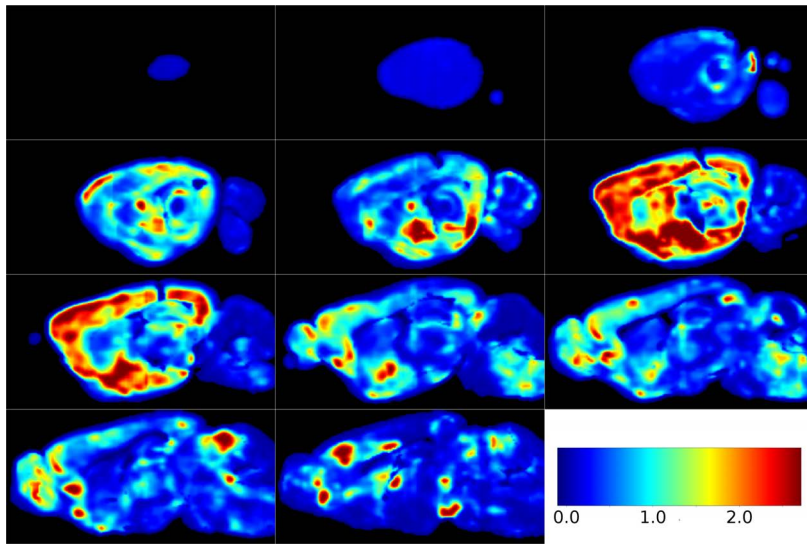

A

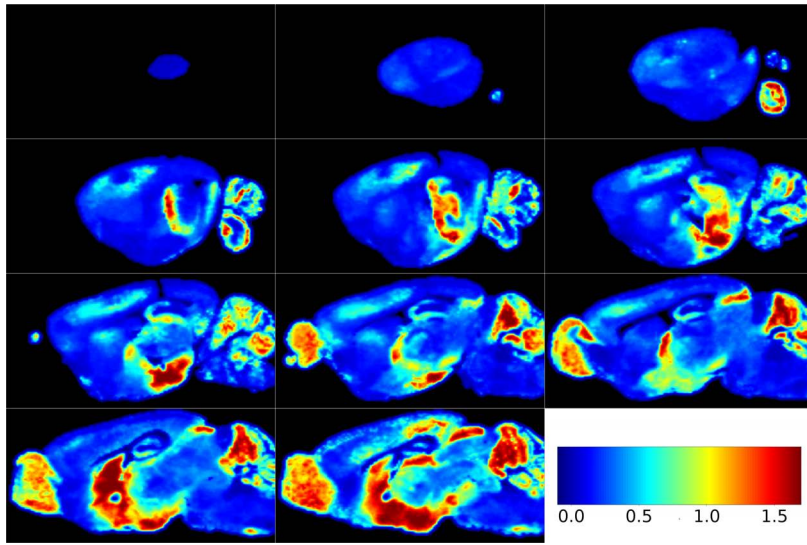

B

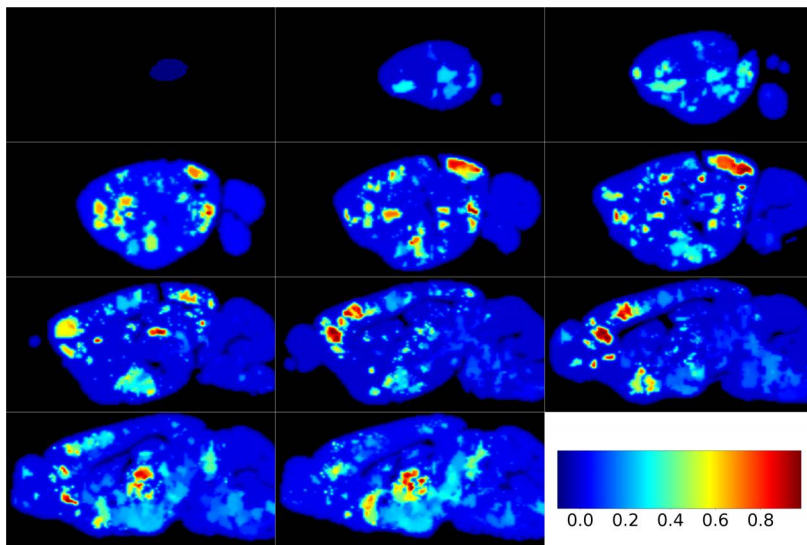

C

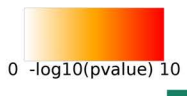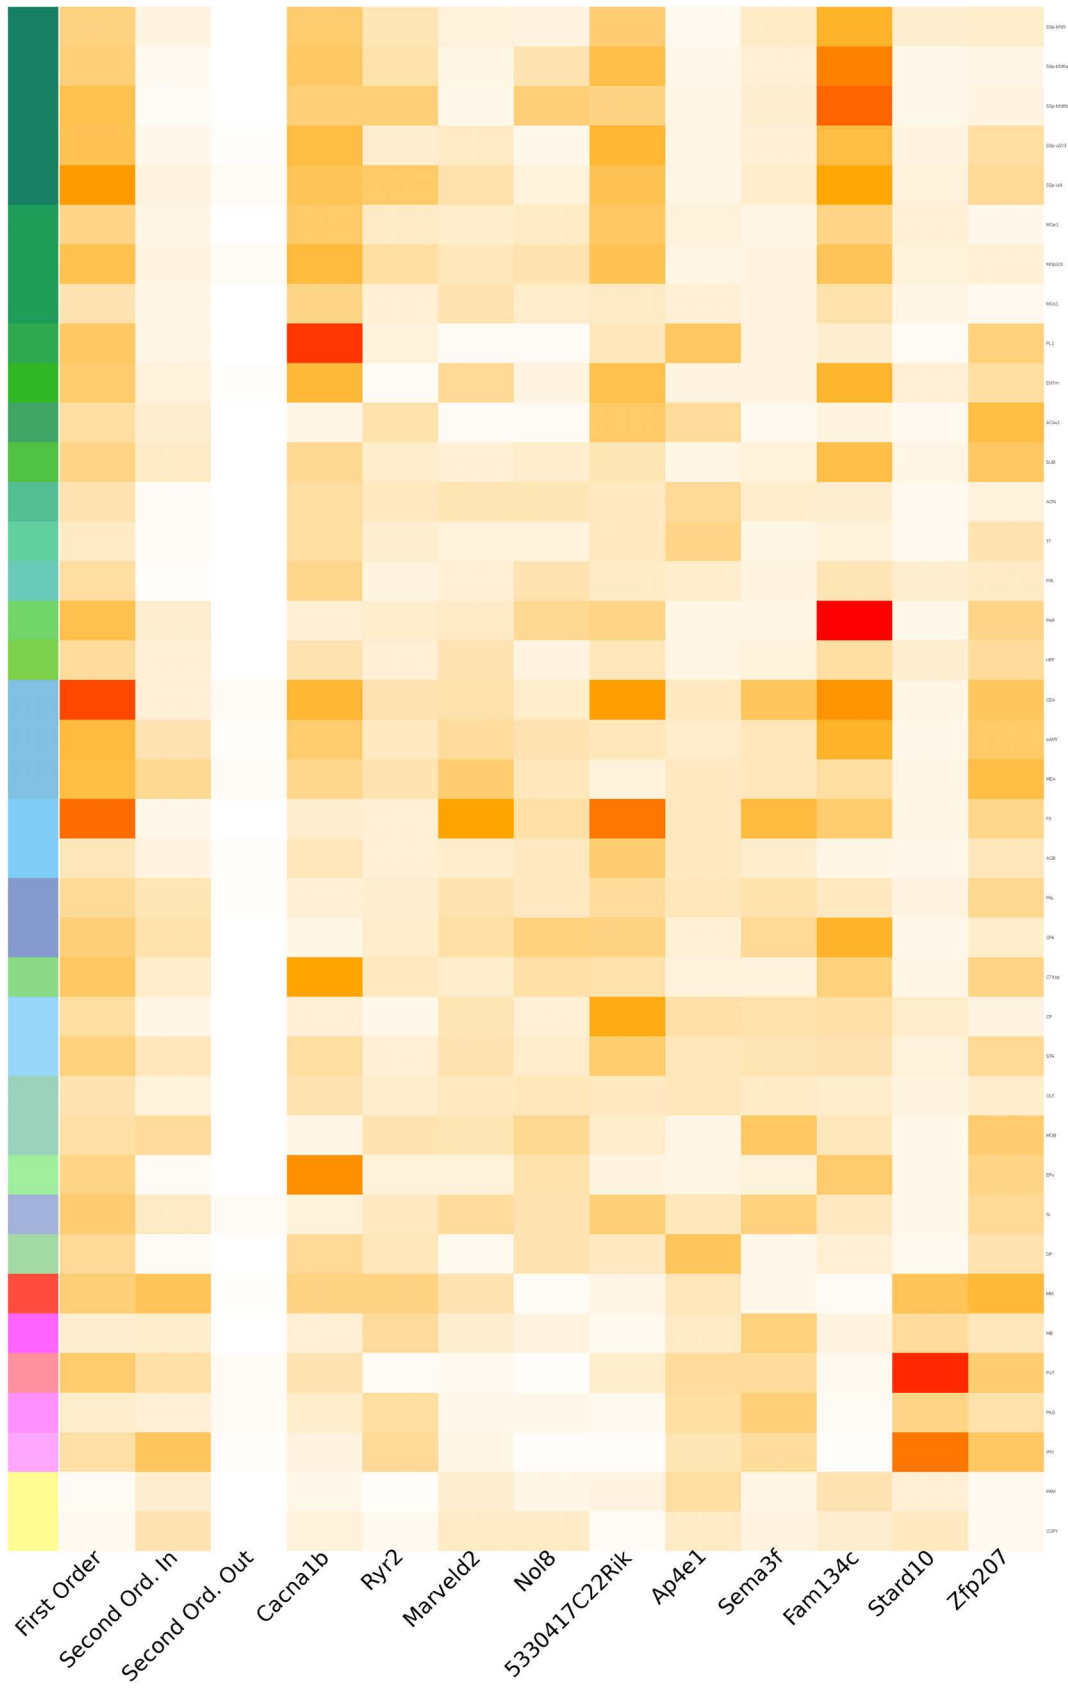

D

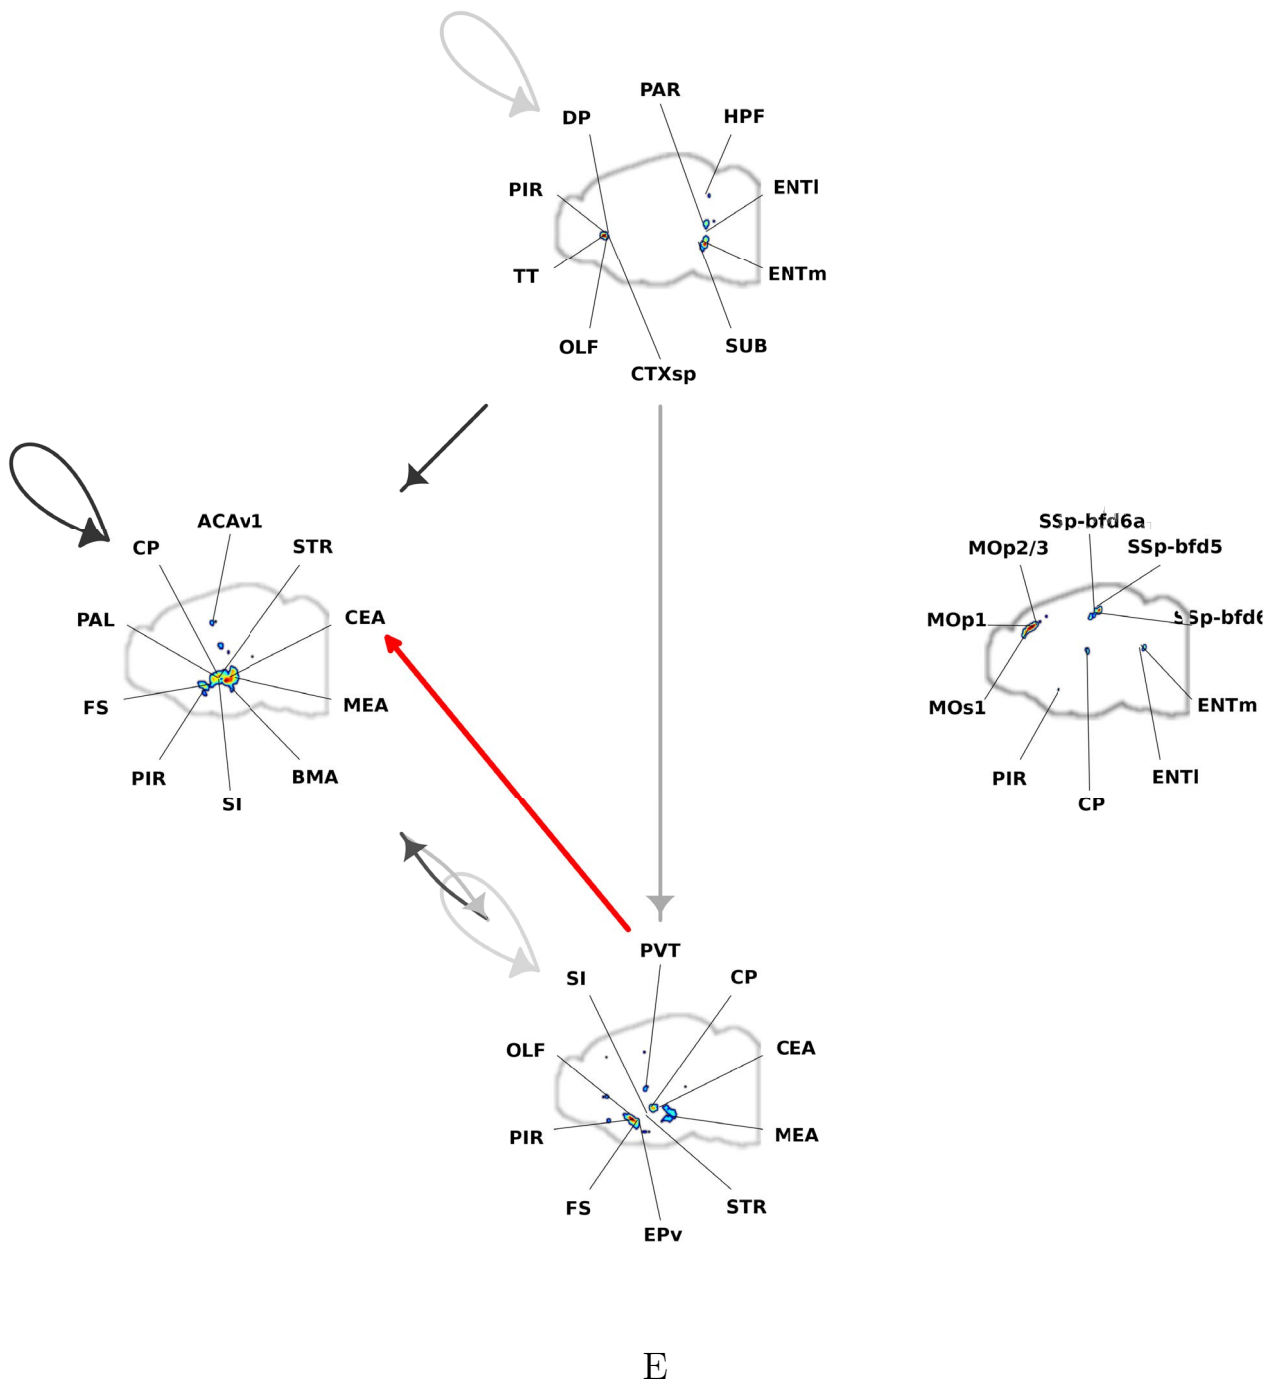

**Supplementary Data 3 Case 21. Startle response gene-set of the fear-QTLs.** (A) Slice-view of first order network measures given as  $-\log_{10}$  scaled p-values. (B) Slice-view of second order network measures (incoming node strength) given as  $-\log_{10}$  scaled p-values. (C) Slice-view of second order network measures (outgoing node strength) given as  $-\log_{10}$  scaled p-values. (D) Heatmap of average log-scaled p-values of first and second order effects as well as single gene effects. (E) Clustered network graph. Clusters of significant brain regions (FDR=0.1) with similar connectivity and their structural connectivity (normalized by the injection volume) given as grey-scale arrows. Red arrows mark selected connections, discussed in the main text.

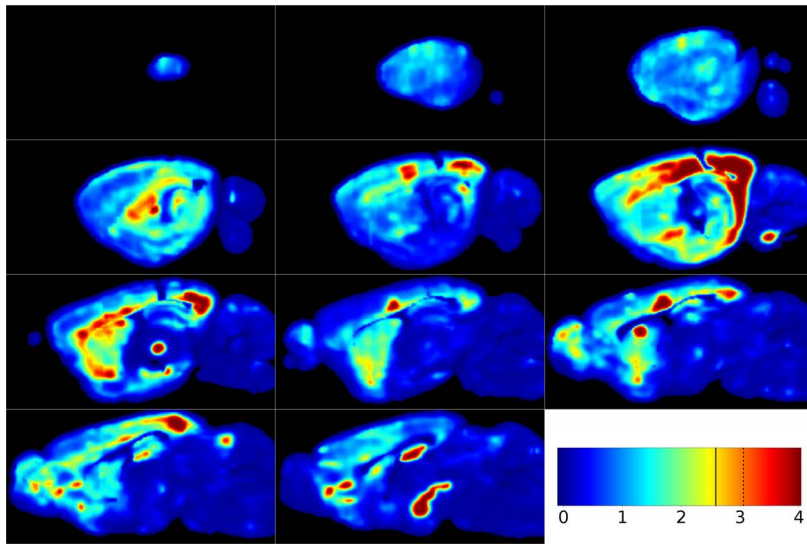

A

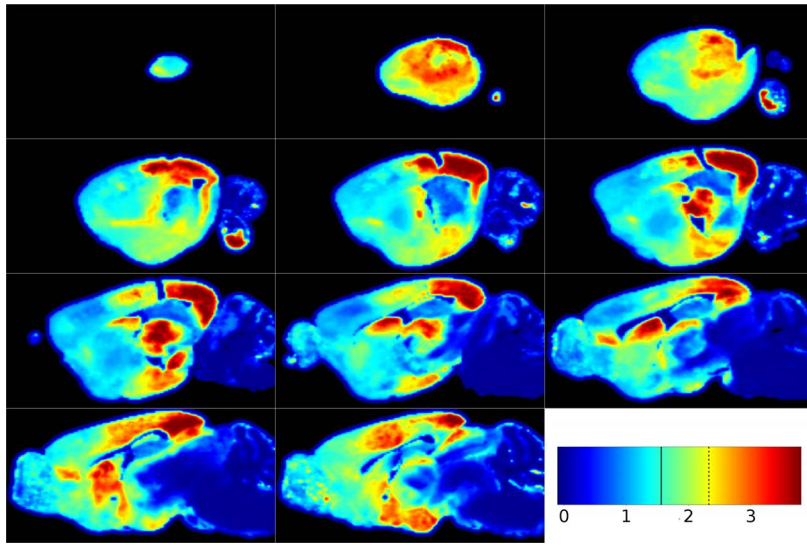

B

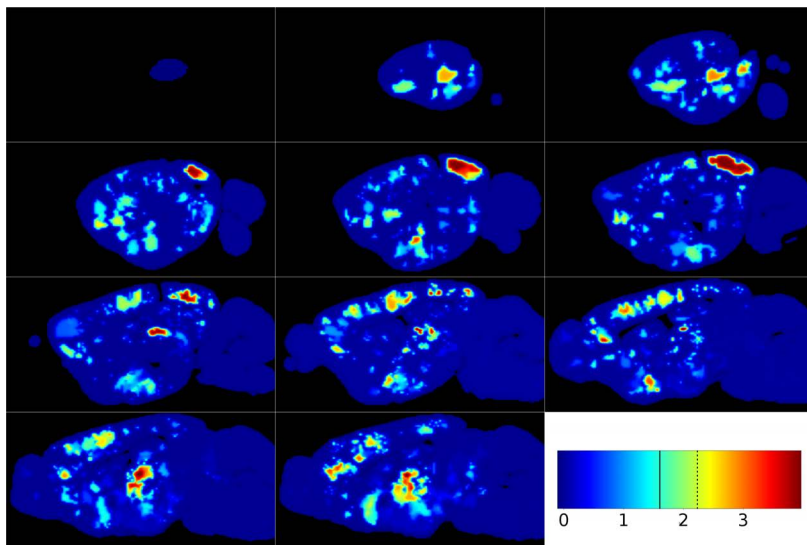

C



0 -log<sub>10</sub>(pvalue) 10

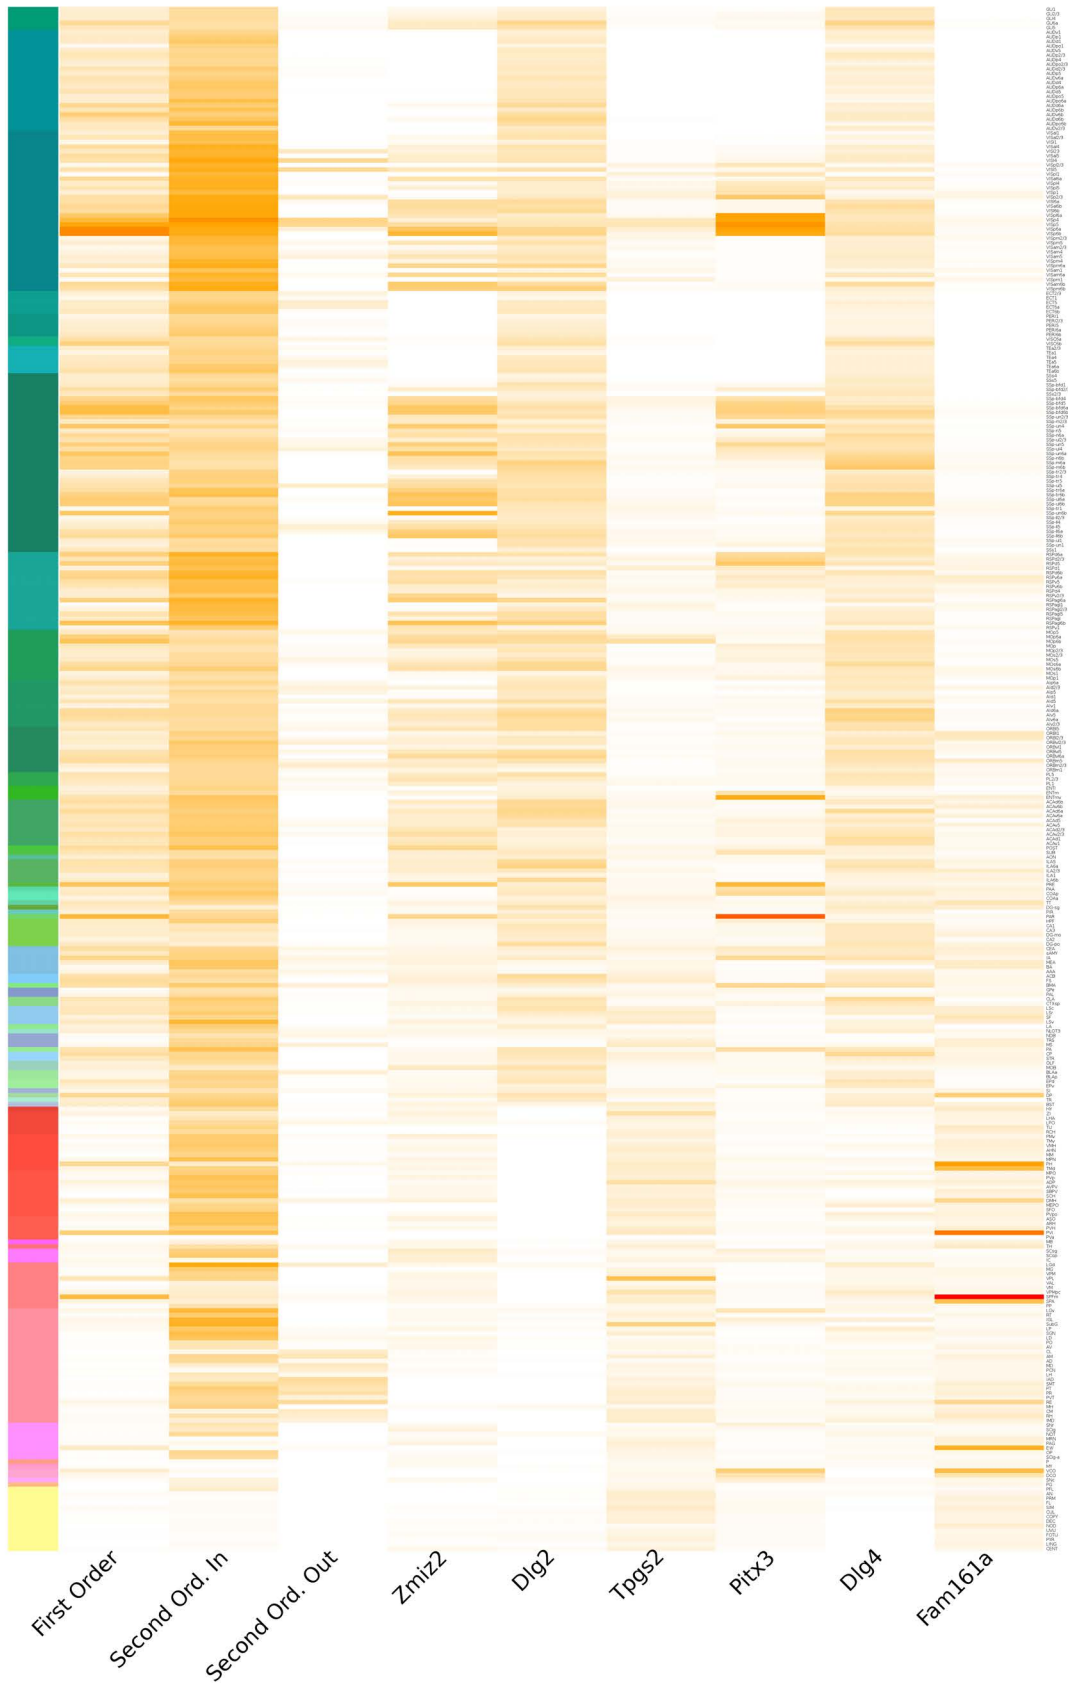

D

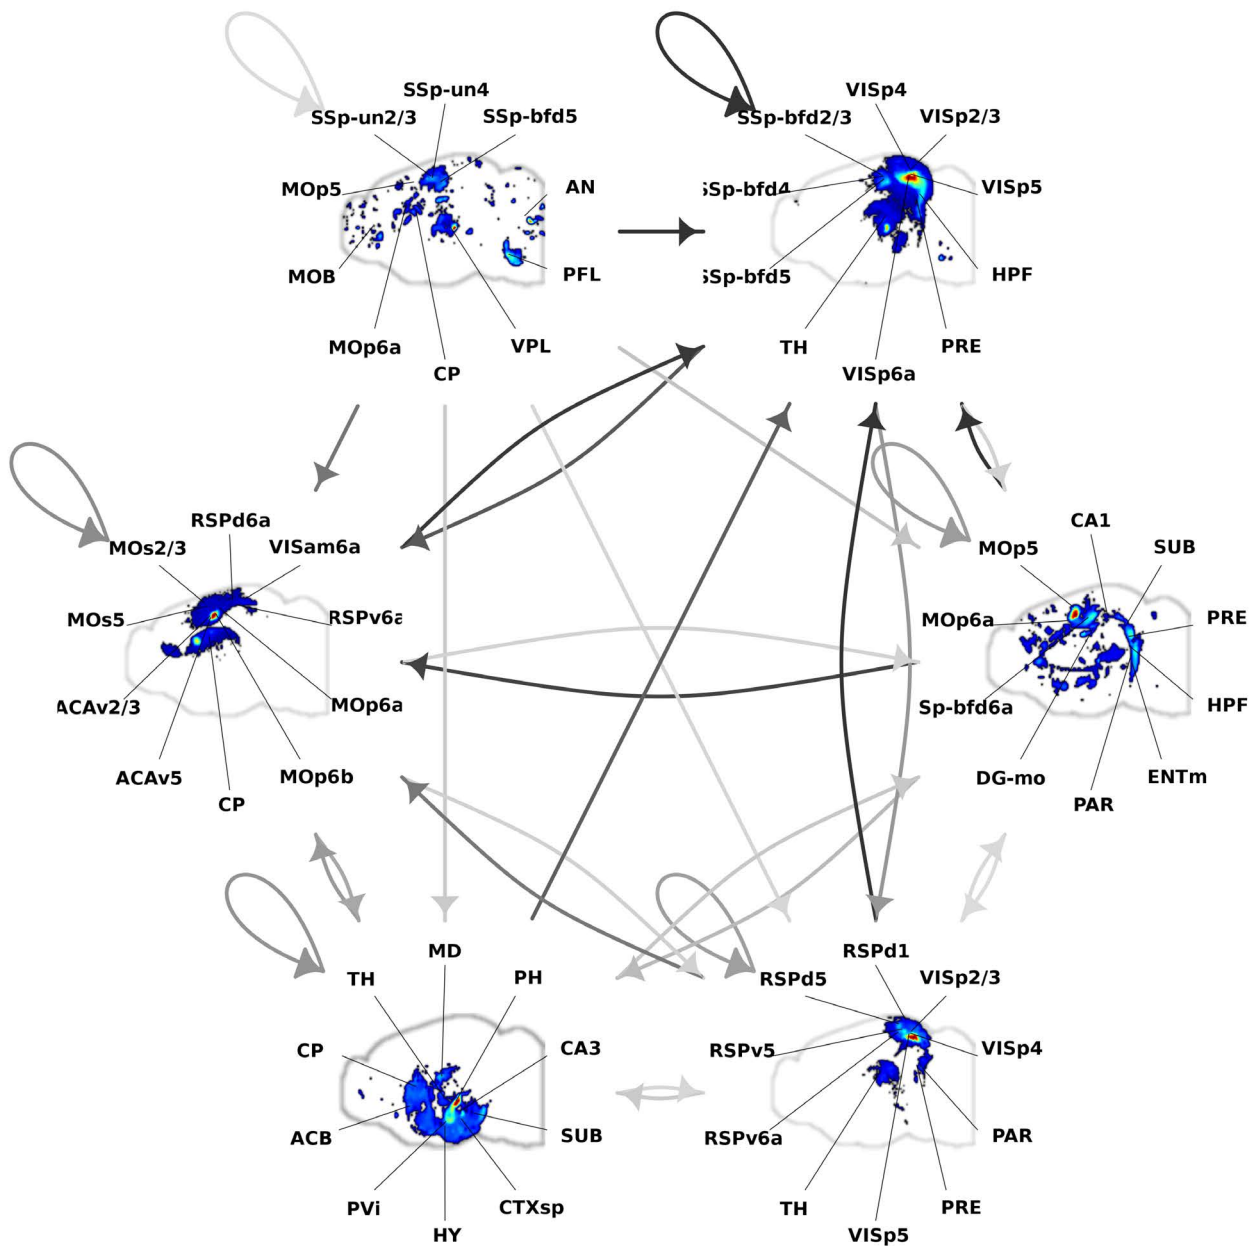

E

**Supplementary Data 3 Case 22. Decreased exploration gene-set of the fear-QTLs.** (A) Slice-view of first order network measures given as  $-\log_{10}$  scaled p-values. (B) Slice-view of second order network measures (incoming node strength) given as  $-\log_{10}$  scaled p-values. (C) Slice-view of second order network measures (outgoing node strength) given as  $-\log_{10}$  scaled p-values. (D) Heatmap of average log-scaled p-values of first and second order effects as well as single gene effects. (E) Clustered network graph. Clusters of significant brain regions (FDR=0.05) with similar connectivity and their structural connectivity (normalized by the injection volume) given as grey-scale arrows.

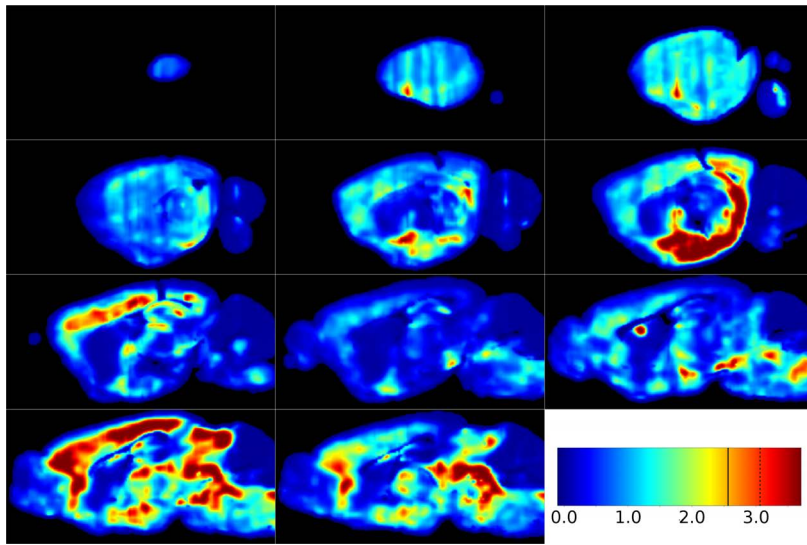

A

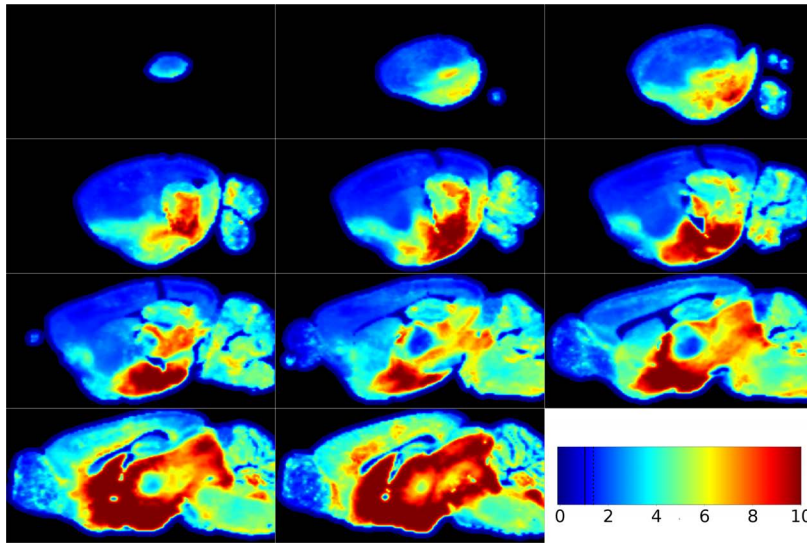

B

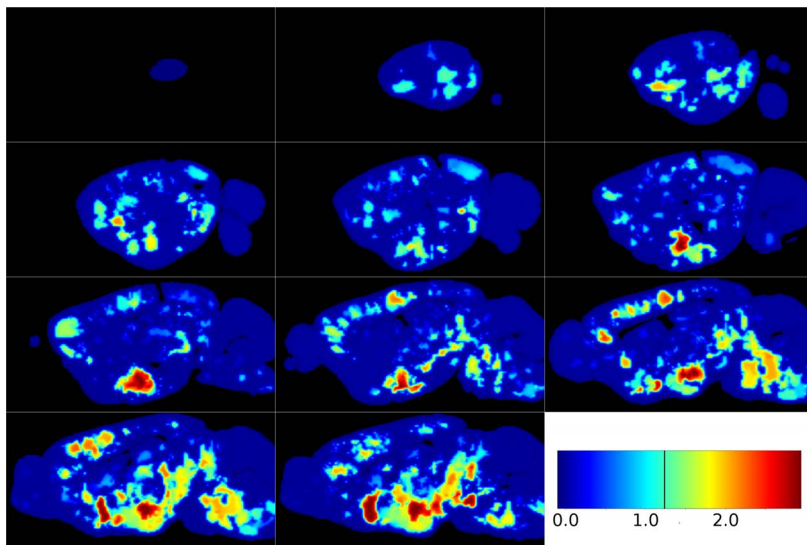

C

0 -log<sub>10</sub>(pvalue) 10

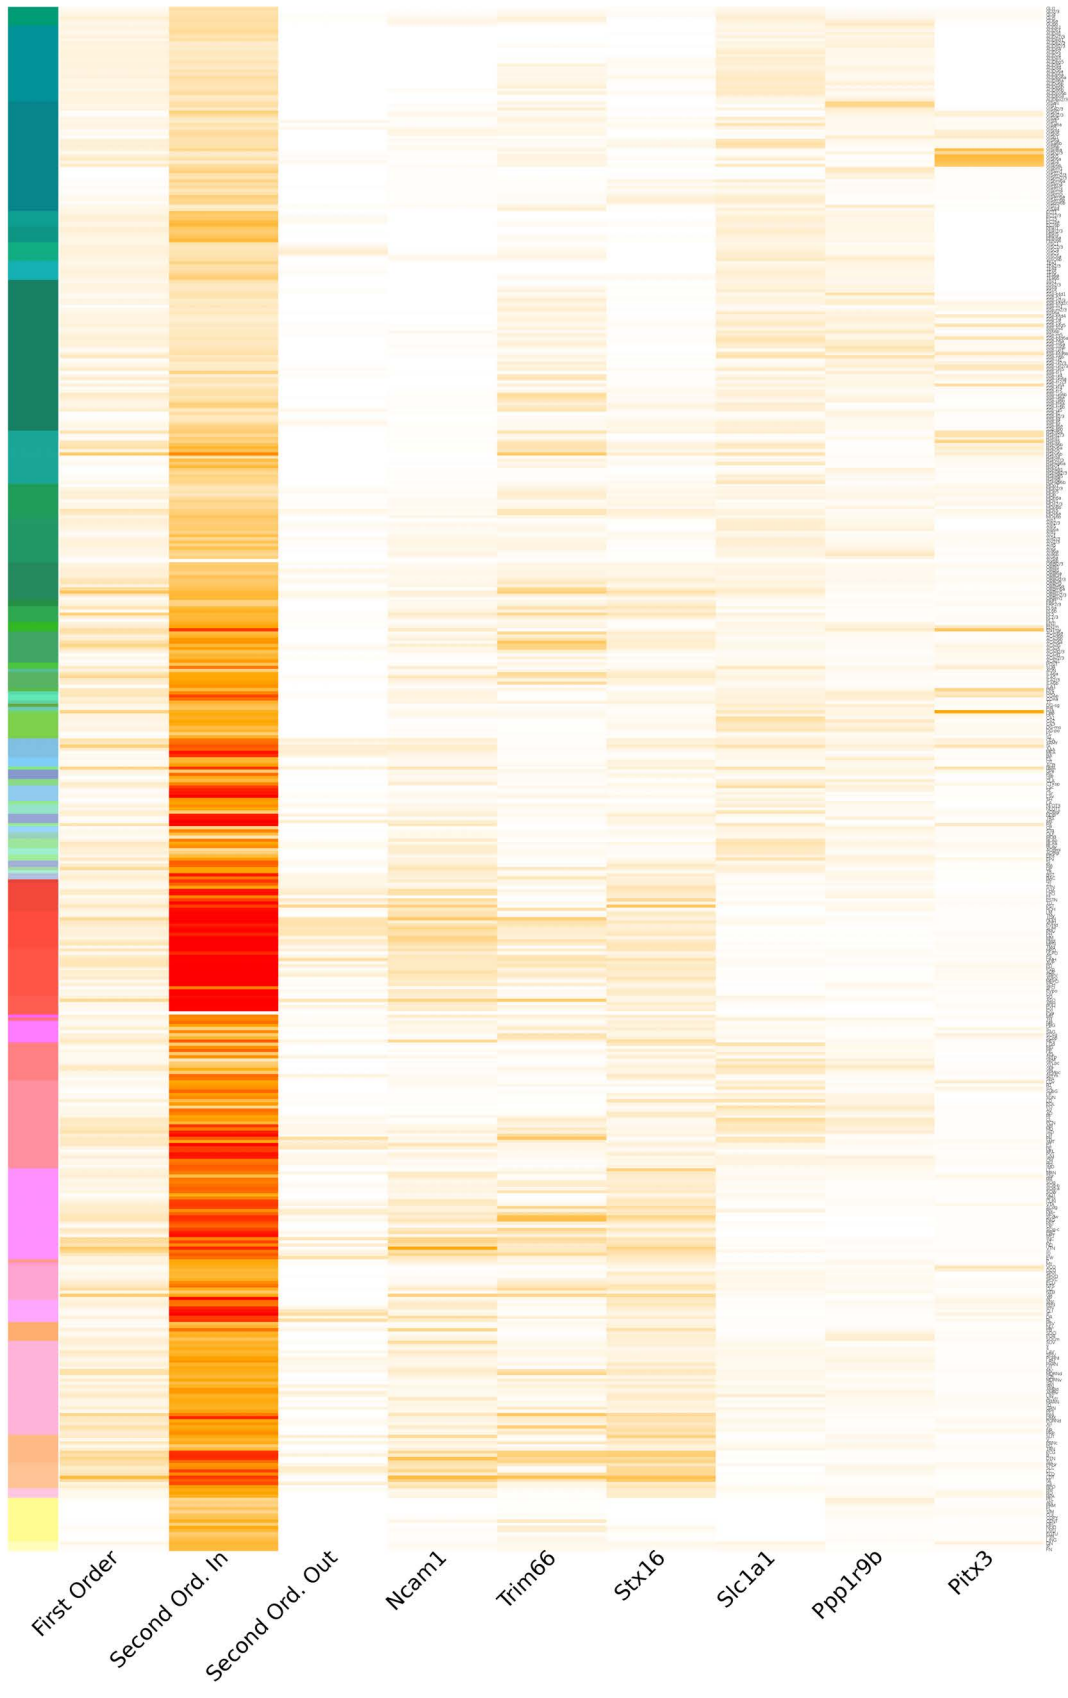

D

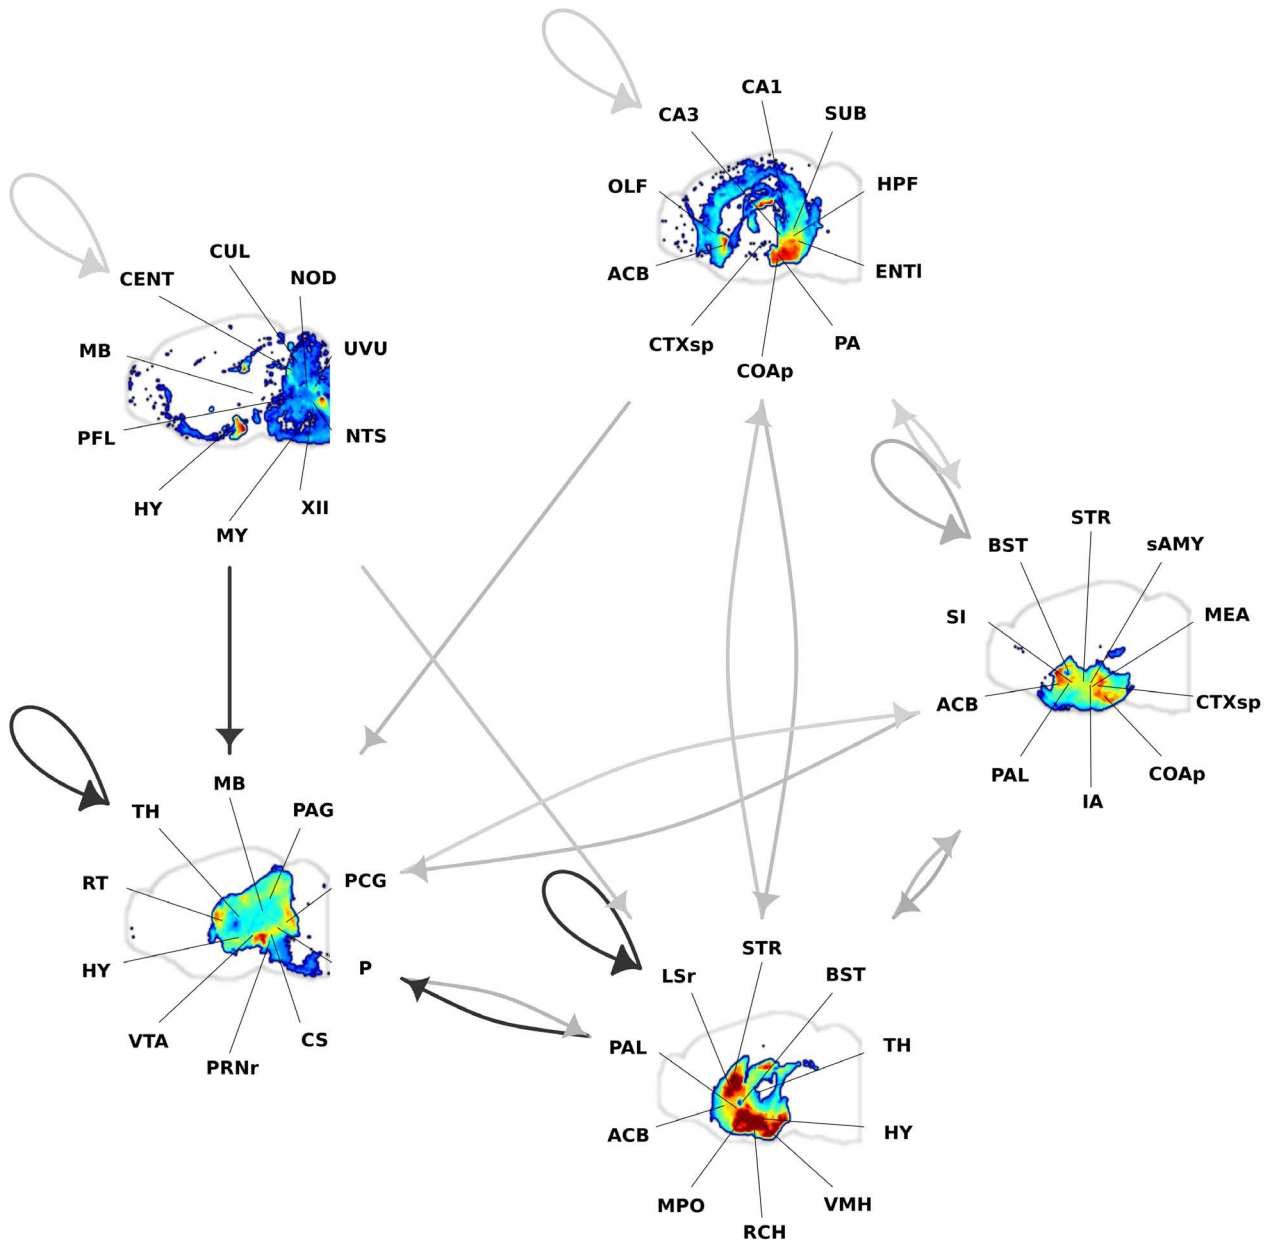

E

**Supplementary Data 3 Case 23. Increased exploration gene-set of the fear-QTLs.** (A) Slice-view of first order network measures given as  $-\log_{10}$  scaled p-values. (B) Slice-view of second order network measures (incoming node strength) given as  $-\log_{10}$  scaled p-values. (C) Slice-view of second order network measures (outgoing node strength) given as  $-\log_{10}$  scaled p-values. (D) Heatmap of average log-scaled p-values of first and second order effects as well as single gene effects. (E) Clustered network graph. Clusters of significant brain regions (FDR=0.05) with similar connectivity and their structural connectivity (normalized by the injection volume) given as grey-scale arrows.



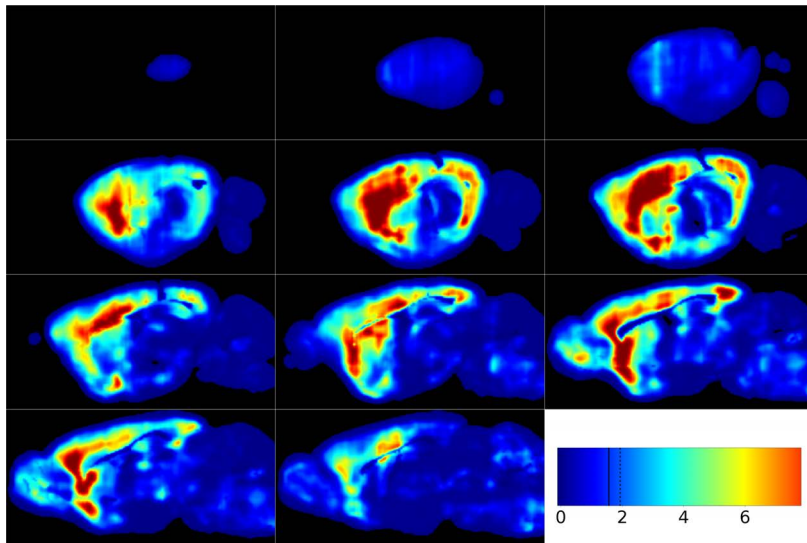

A

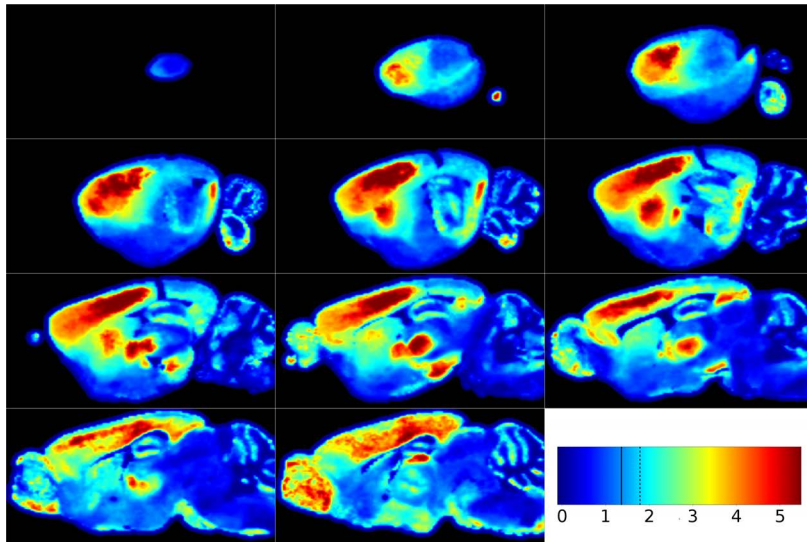

B

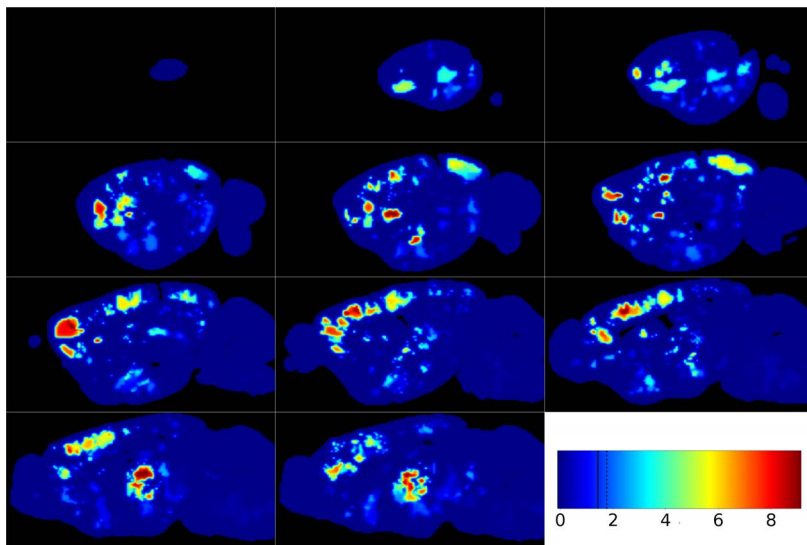

C



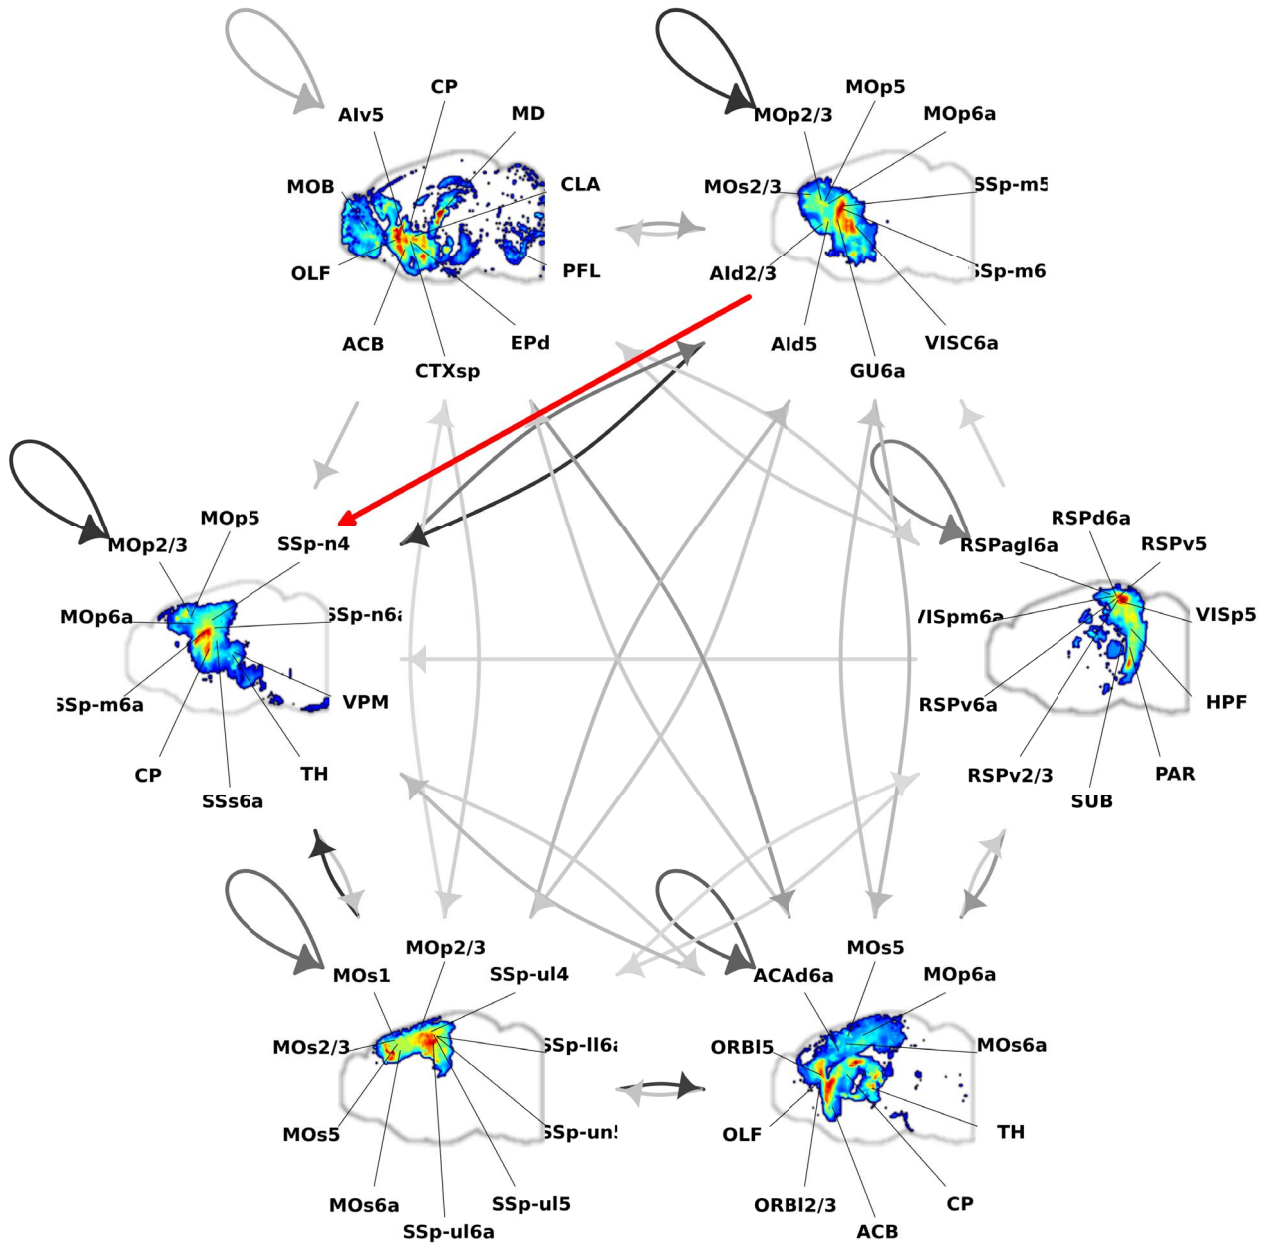

E

**Supplementary Data 3 Case 24. Behaviour gene-set of the autism-QTLs.** (A) Slice-view of first order network measures given as  $-\log_{10}$  scaled p-values. (B) Slice-view of second order network measures (incoming node strength) given as  $-\log_{10}$  scaled p-values. (C) Slice-view of second order network measures (outgoing node strength) given as  $-\log_{10}$  scaled p-values. (D) Heatmap of average log-scaled p-values of first and second order effects as well as single gene effects. (E) Clustered network graph. Clusters of significant brain regions (FDR=0.05) with similar connectivity and their structural connectivity (normalized by the injection volume) given as grey-scale arrows. Red arrows mark selected connections, discussed in the main text.

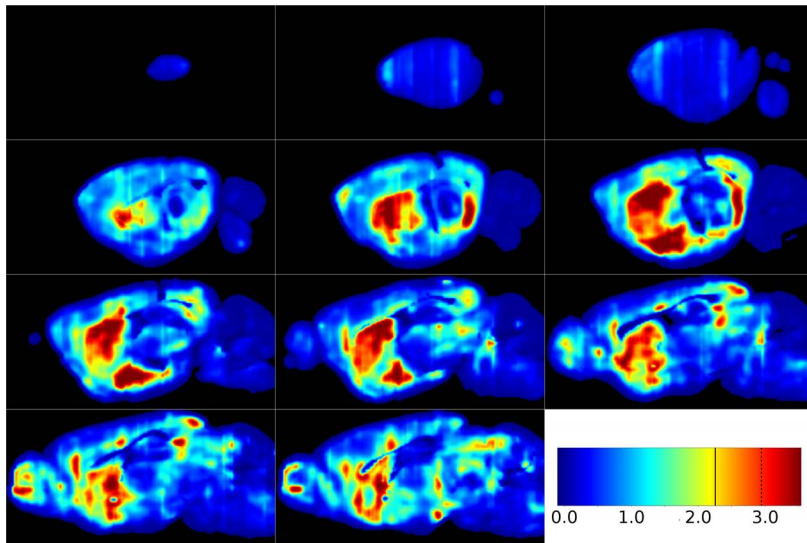

A

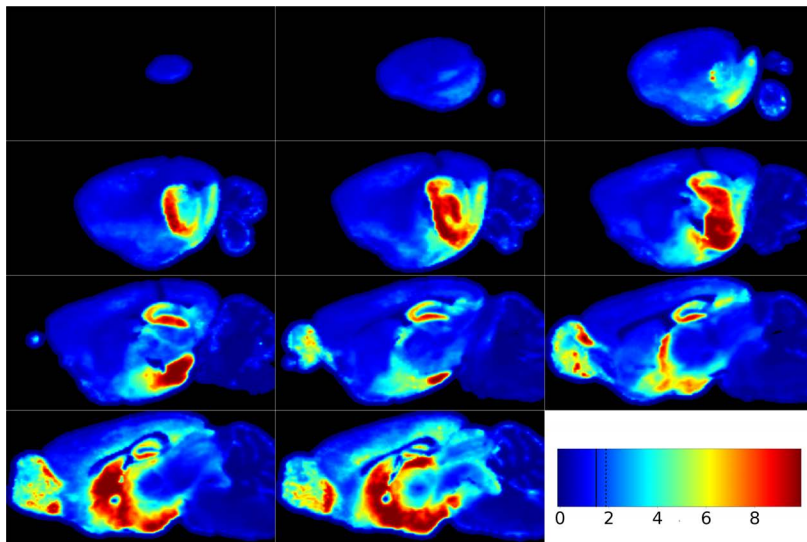

B

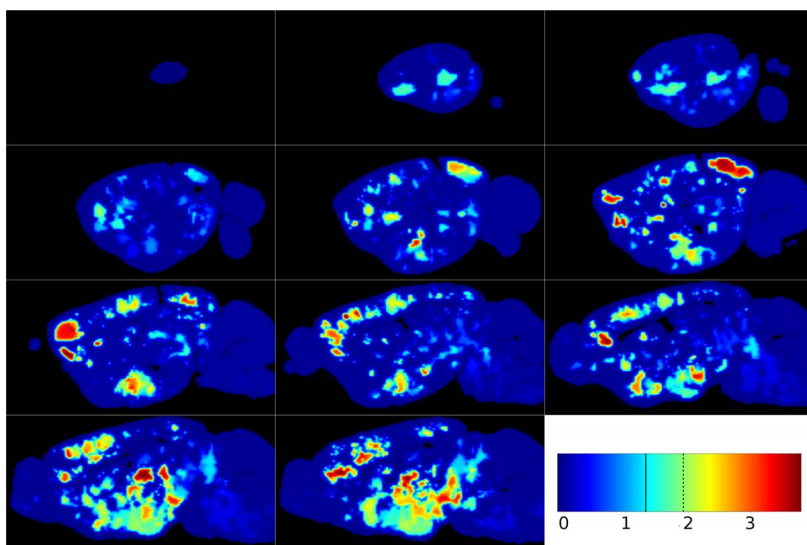

C



0 -log<sub>10</sub>(pvalue) 10

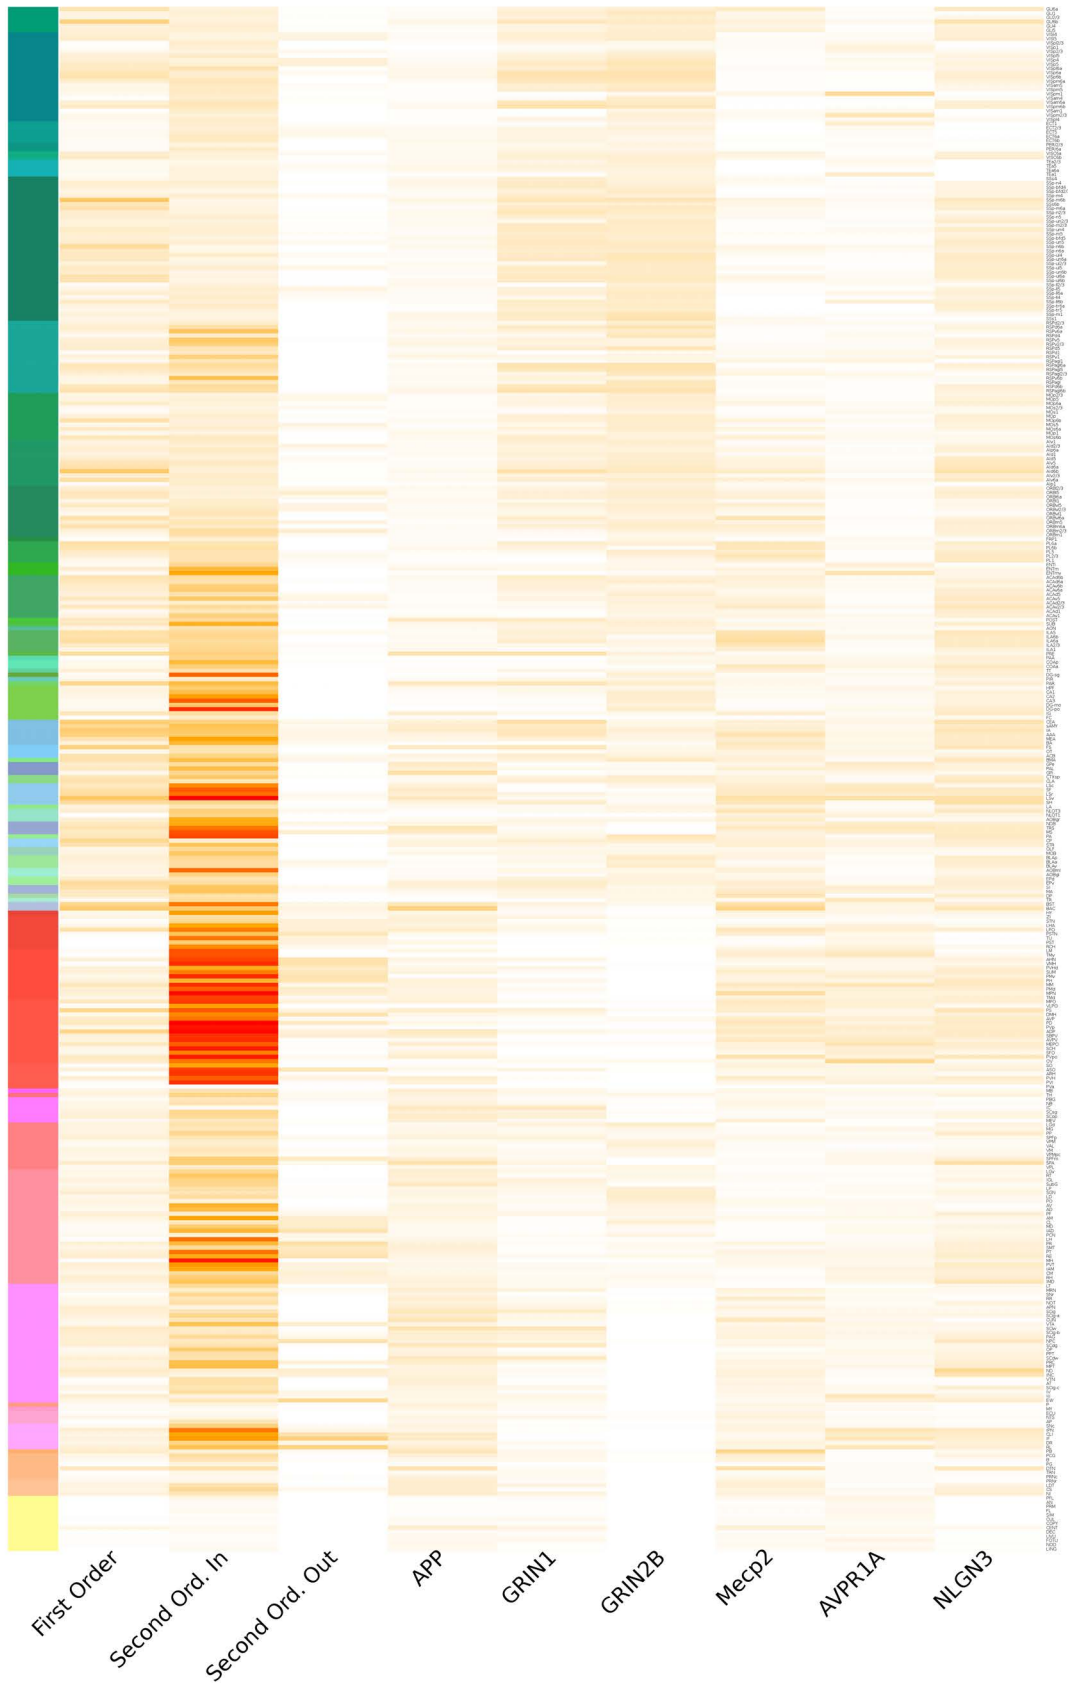

D



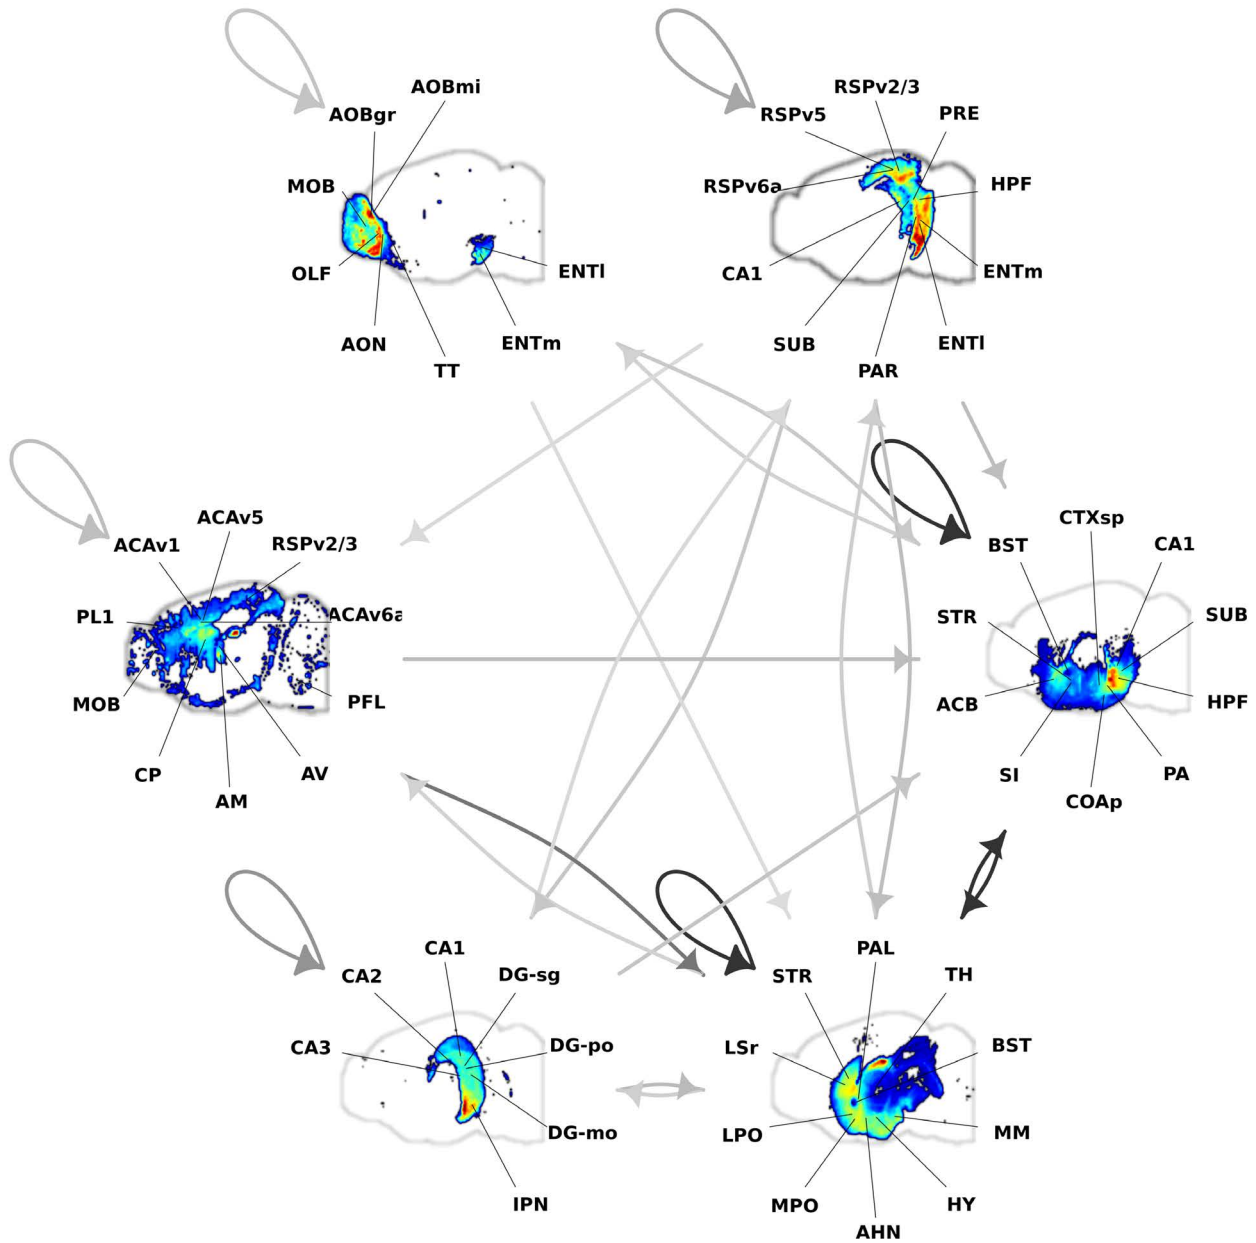

E

**Supplementary Data 3 Case 25. Social interaction gene-set of the autism-QTLs.** (A) Slice-view of first order network measures given as  $-\log_{10}$  scaled p-values. (B) Slice-view of second order network measures (incoming node strength) given as  $-\log_{10}$  scaled p-values. (C) Slice-view of second order network measures (outgoing node strength) given as  $-\log_{10}$  scaled p-values. (D) Heatmap of average log-scaled p-values of first and second order effects as well as single gene effects. (E) Clustered network graph. Clusters of significant brain regions (FDR=0.05) with similar connectivity and their structural connectivity (normalized by the injection volume) given as grey-scale arrows.

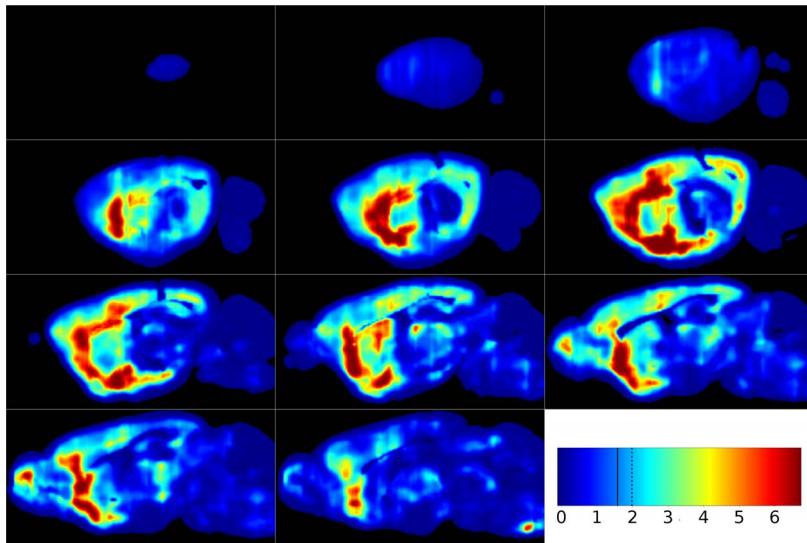

A

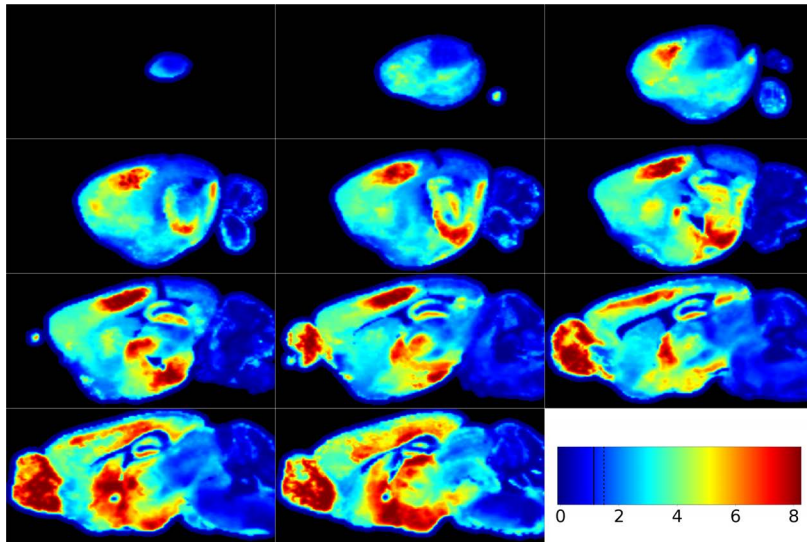

B

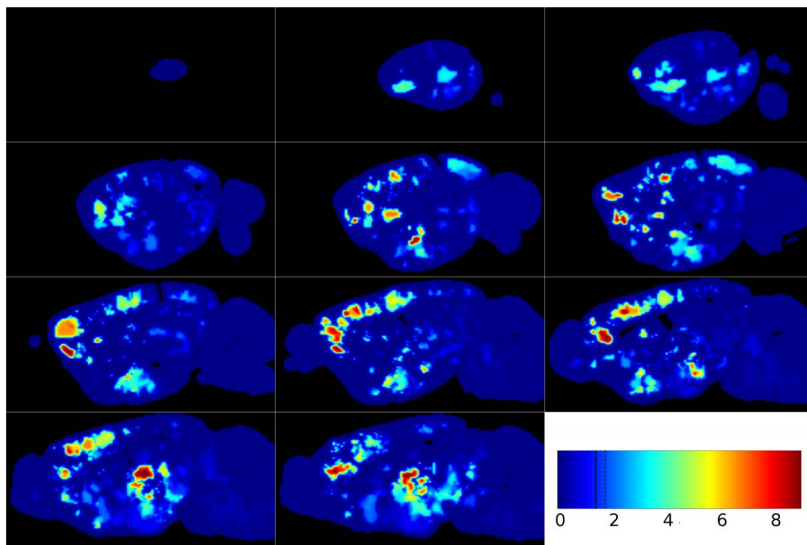

C

0 -log<sub>10</sub>(pvalue) 10

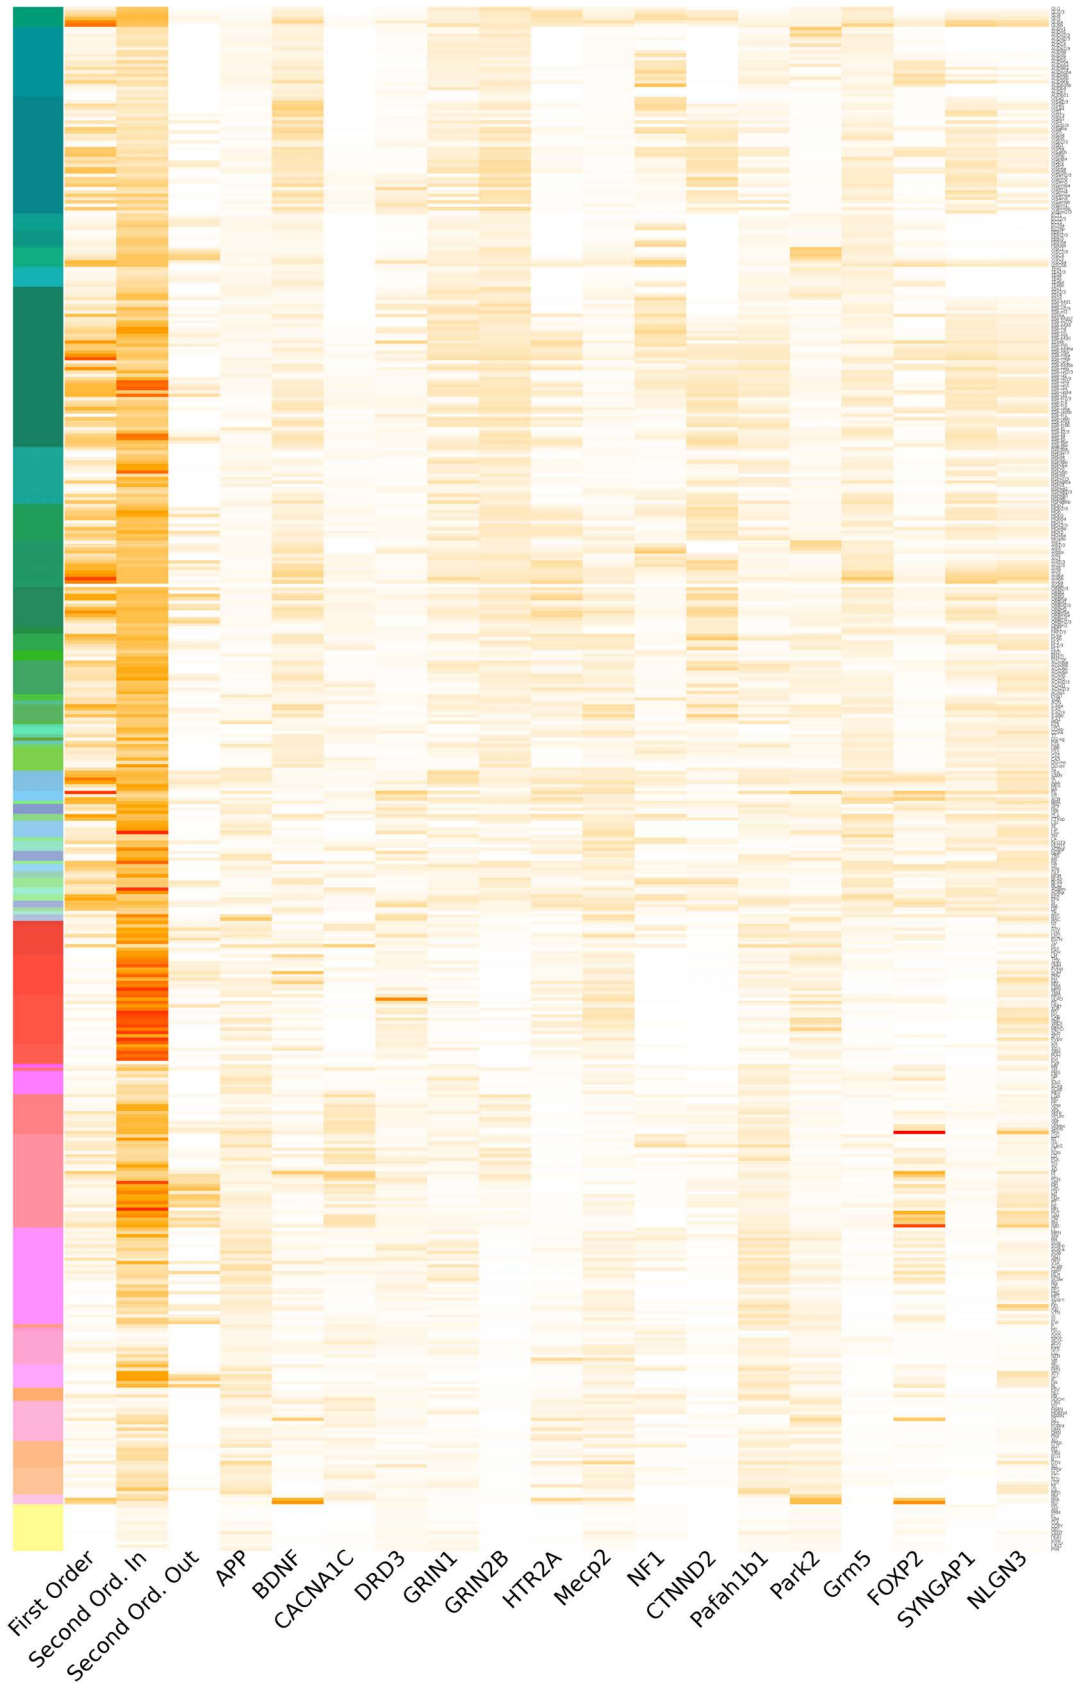

D

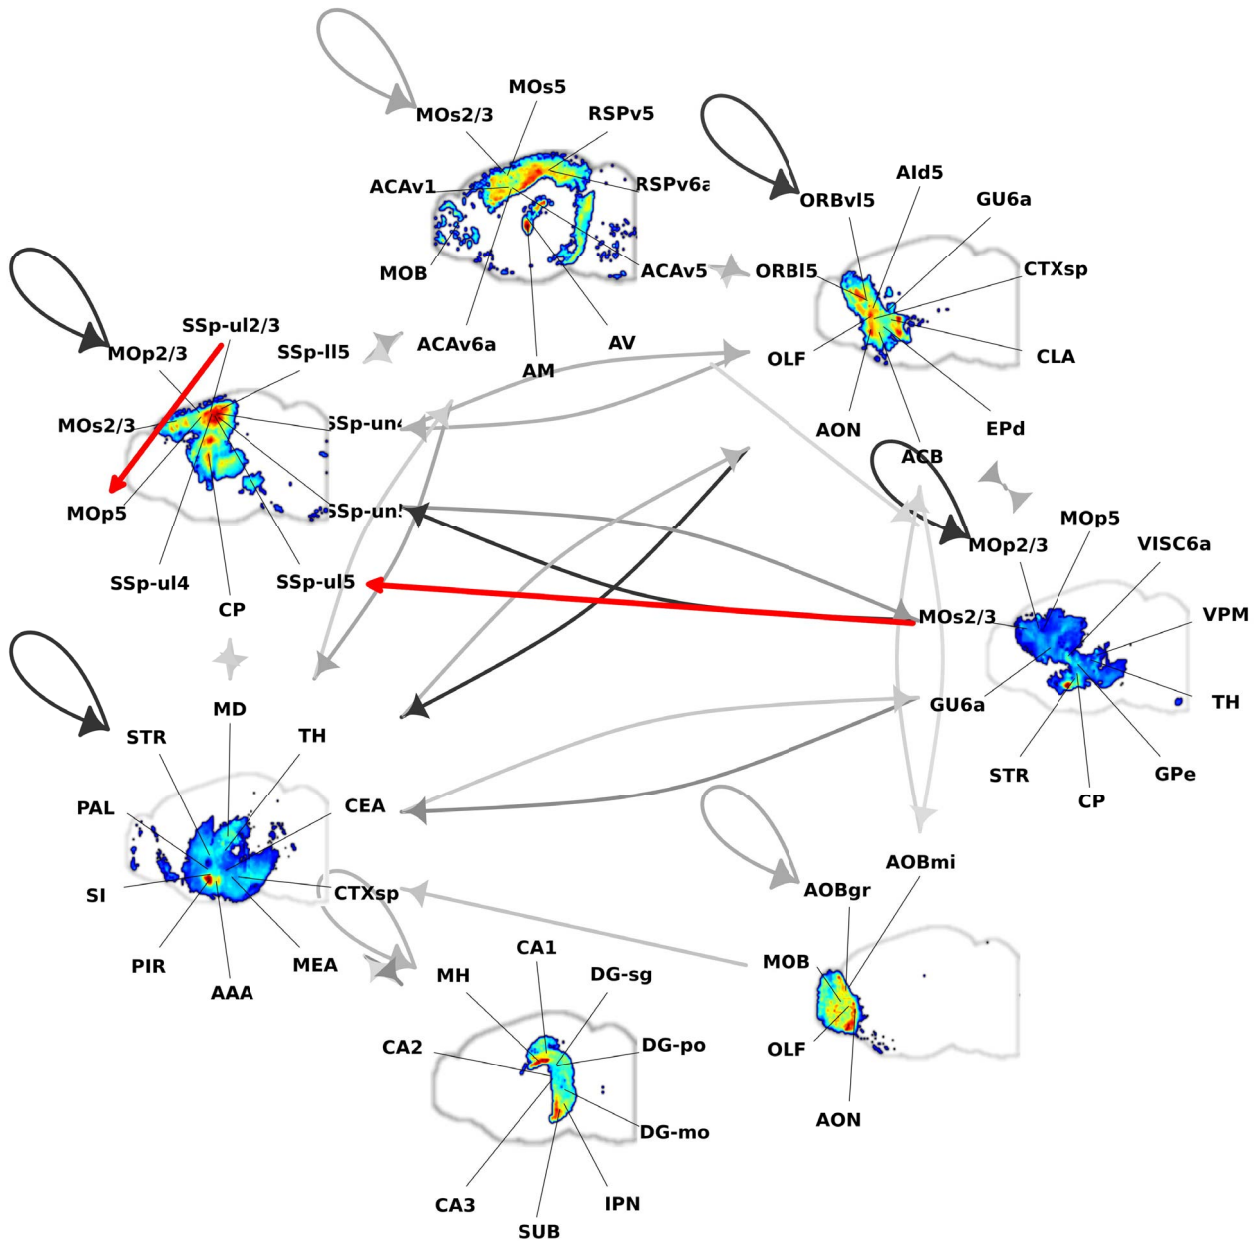

E

**Supplementary Data 3 Case 26. Learning and memory gene-set of the autism-QTLs.** (A) Slice-view of first order network measures given as  $-\log_{10}$  scaled p-values. (B) Slice-view of second order network measures (incoming node strength) given as  $-\log_{10}$  scaled p-values. (C) Slice-view of second order network measures (outgoing node strength) given as  $-\log_{10}$  scaled p-values. (D) Heatmap of average log-scaled p-values of first and second order effects as well as single gene effects. (E) Clustered network graph. Clusters of significant brain regions (FDR=0.05) with similar connectivity and their structural connectivity (normalized by the injection volume) given as grey-scale arrows. Red arrows mark selected connections, discussed in the main text.



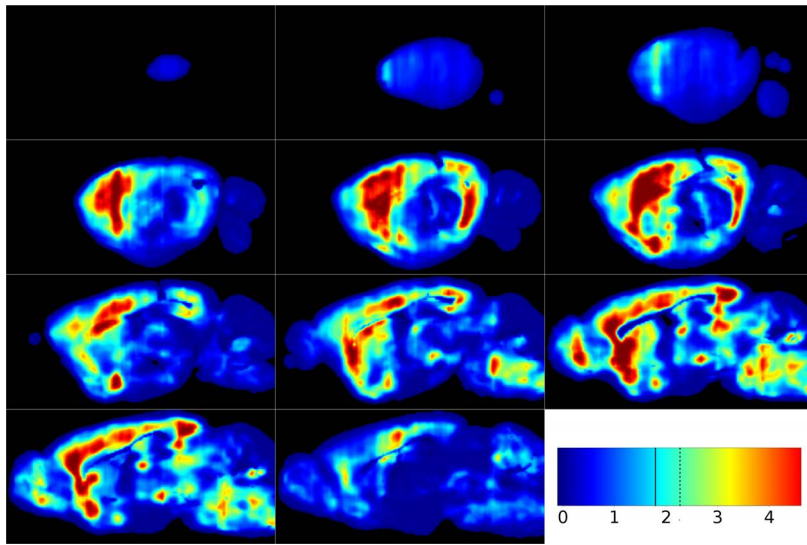

A

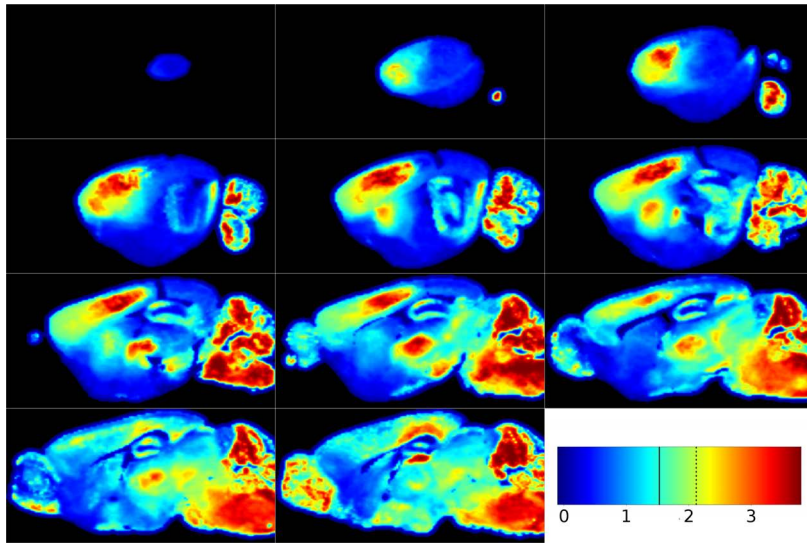

B

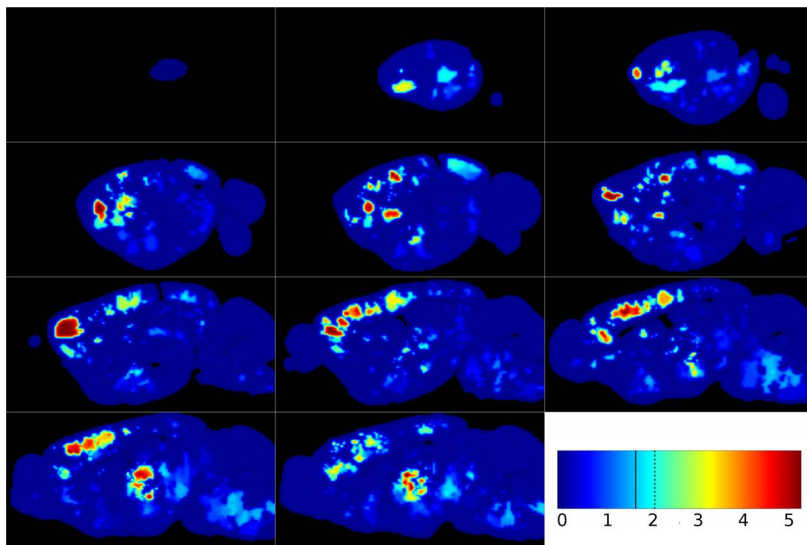

C



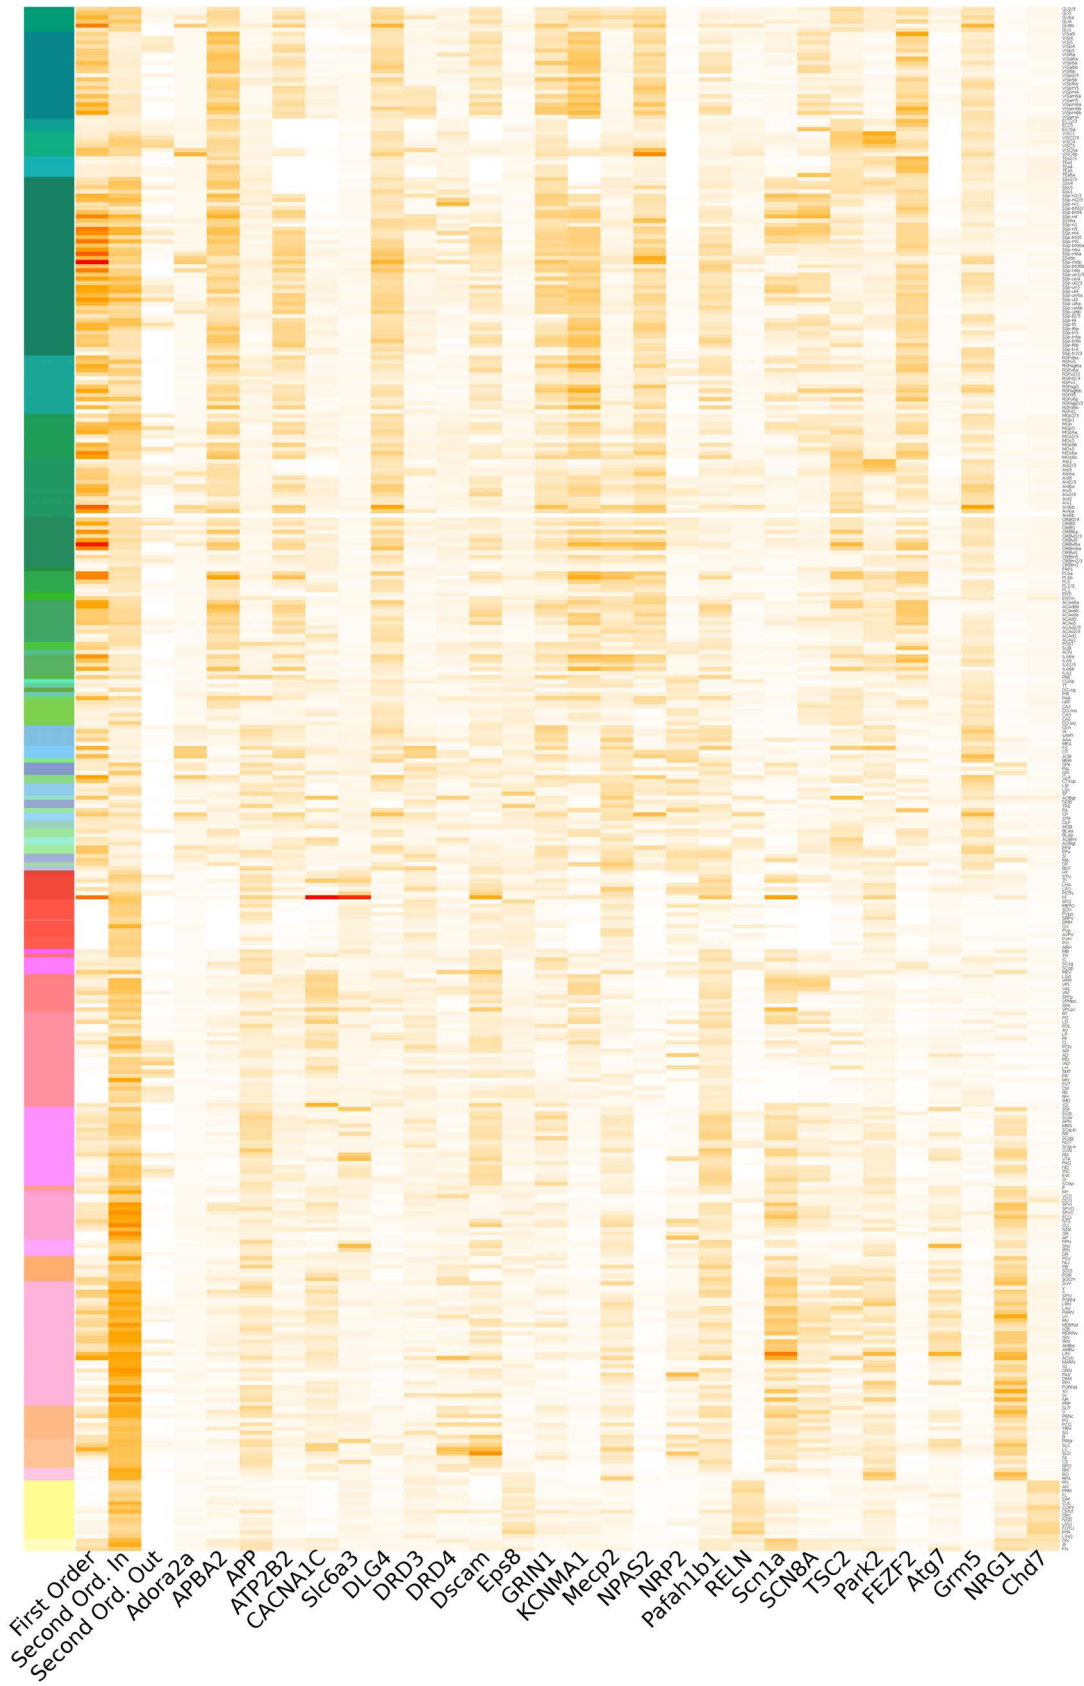

D

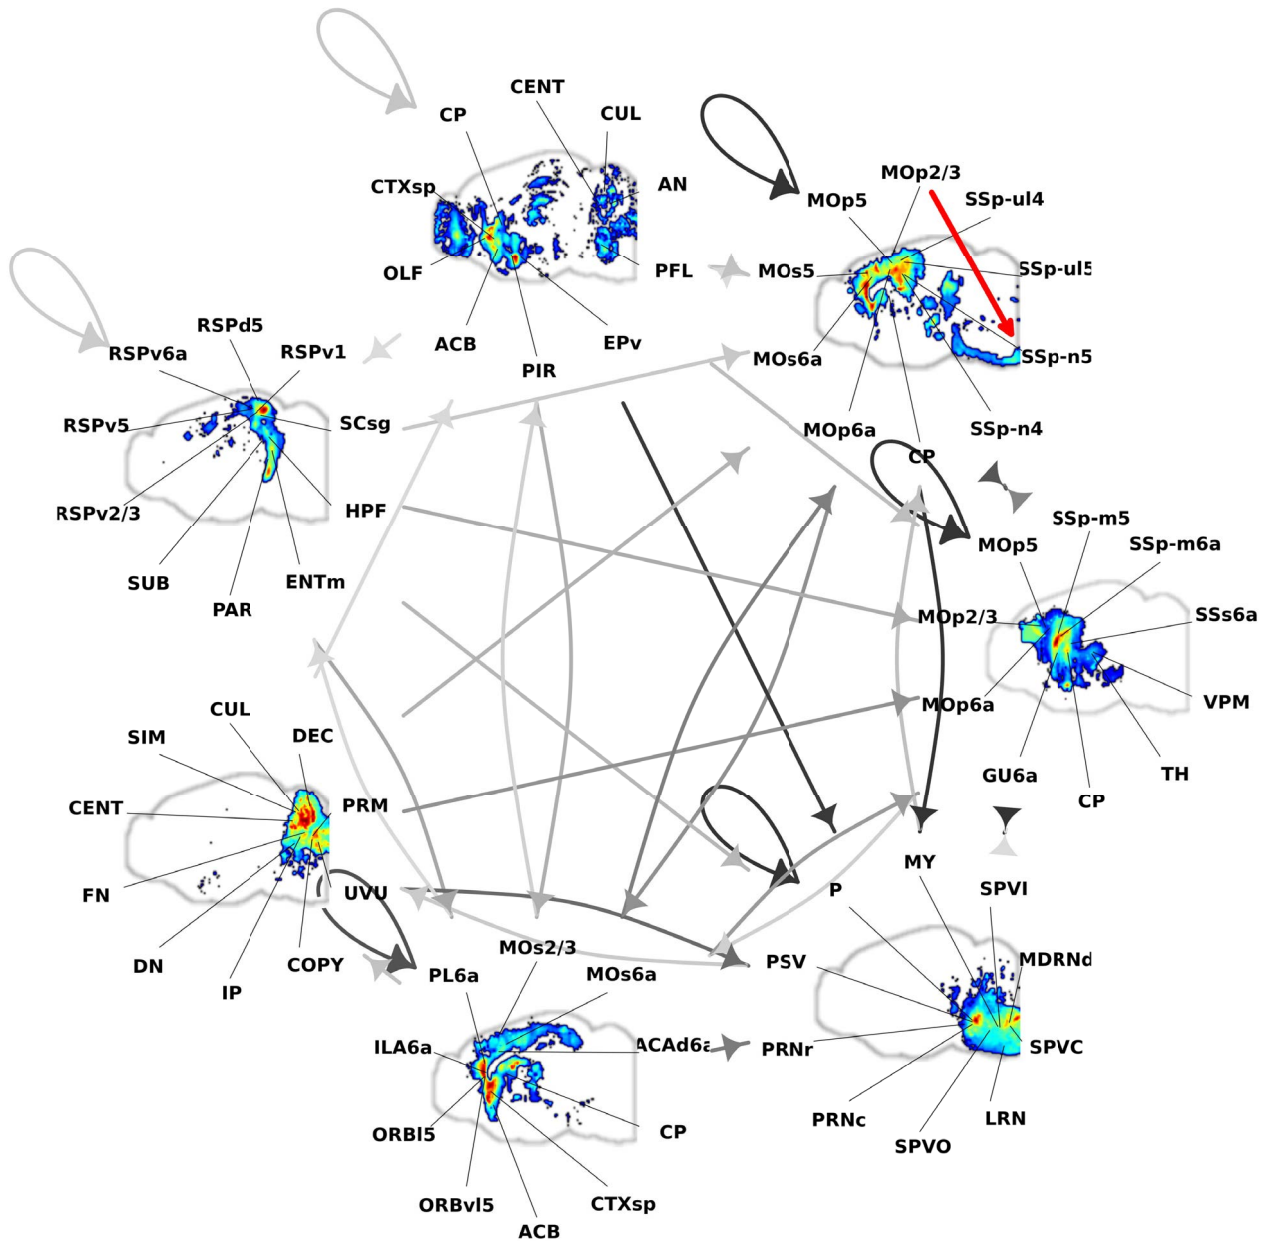

E

**Supplementary Data 3 Case 27. Locomotor behaviour gene-set of the autism-QTLs.** (A) Slice-view of first order network measures given as  $-\log_{10}$  scaled p-values. (B) Slice-view of second order network measures (incoming node strength) given as  $-\log_{10}$  scaled p-values. (C) Slice-view of second order network measures (outgoing node strength) given as  $-\log_{10}$  scaled p-values. (D) Heatmap of average log-scaled p-values of first and second order effects as well as single gene effects. (E) Clustered network graph. Clusters of significant brain regions (FDR=0.05) with similar connectivity and their structural connectivity (normalized by the injection volume) given as grey-scale arrows. Red arrows mark selected connections, discussed in the main text.

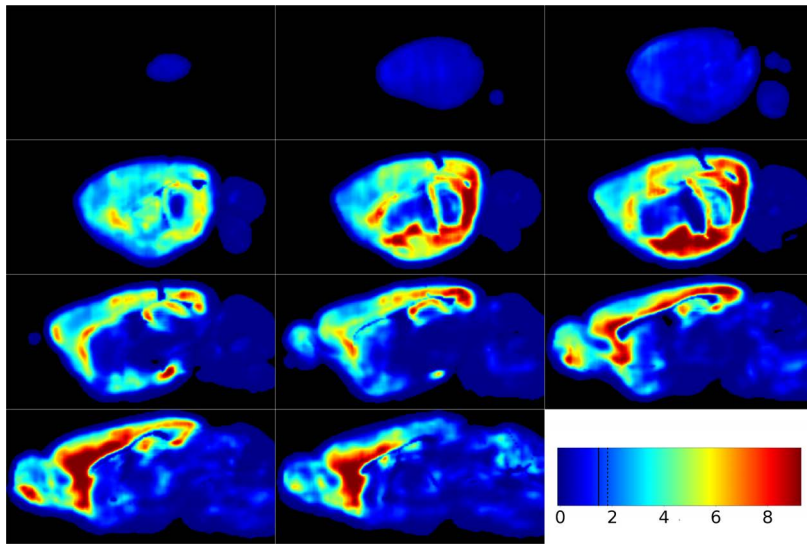

A

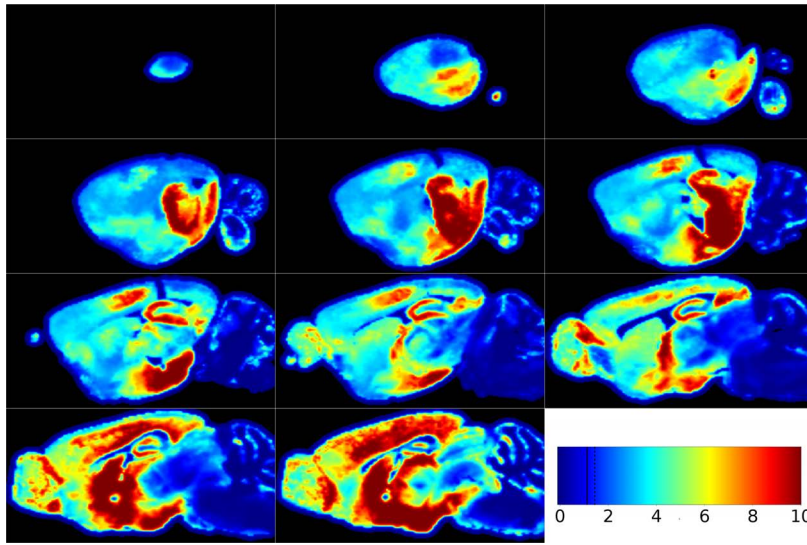

B

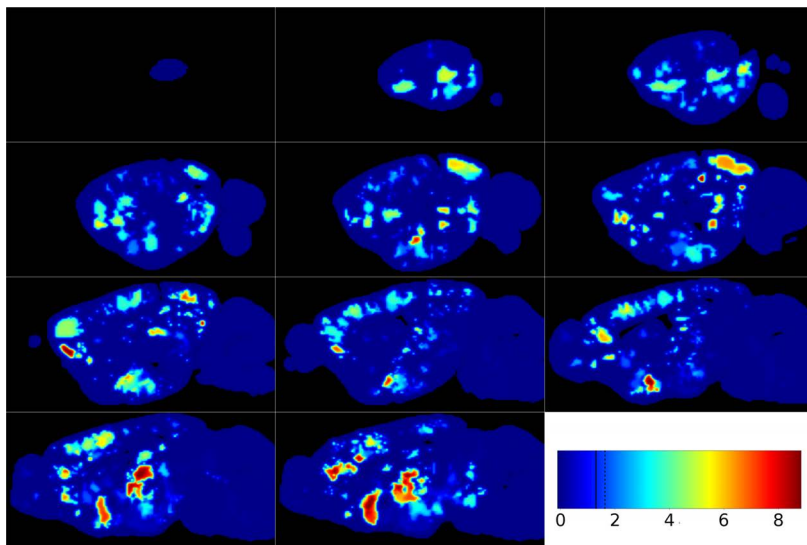

C





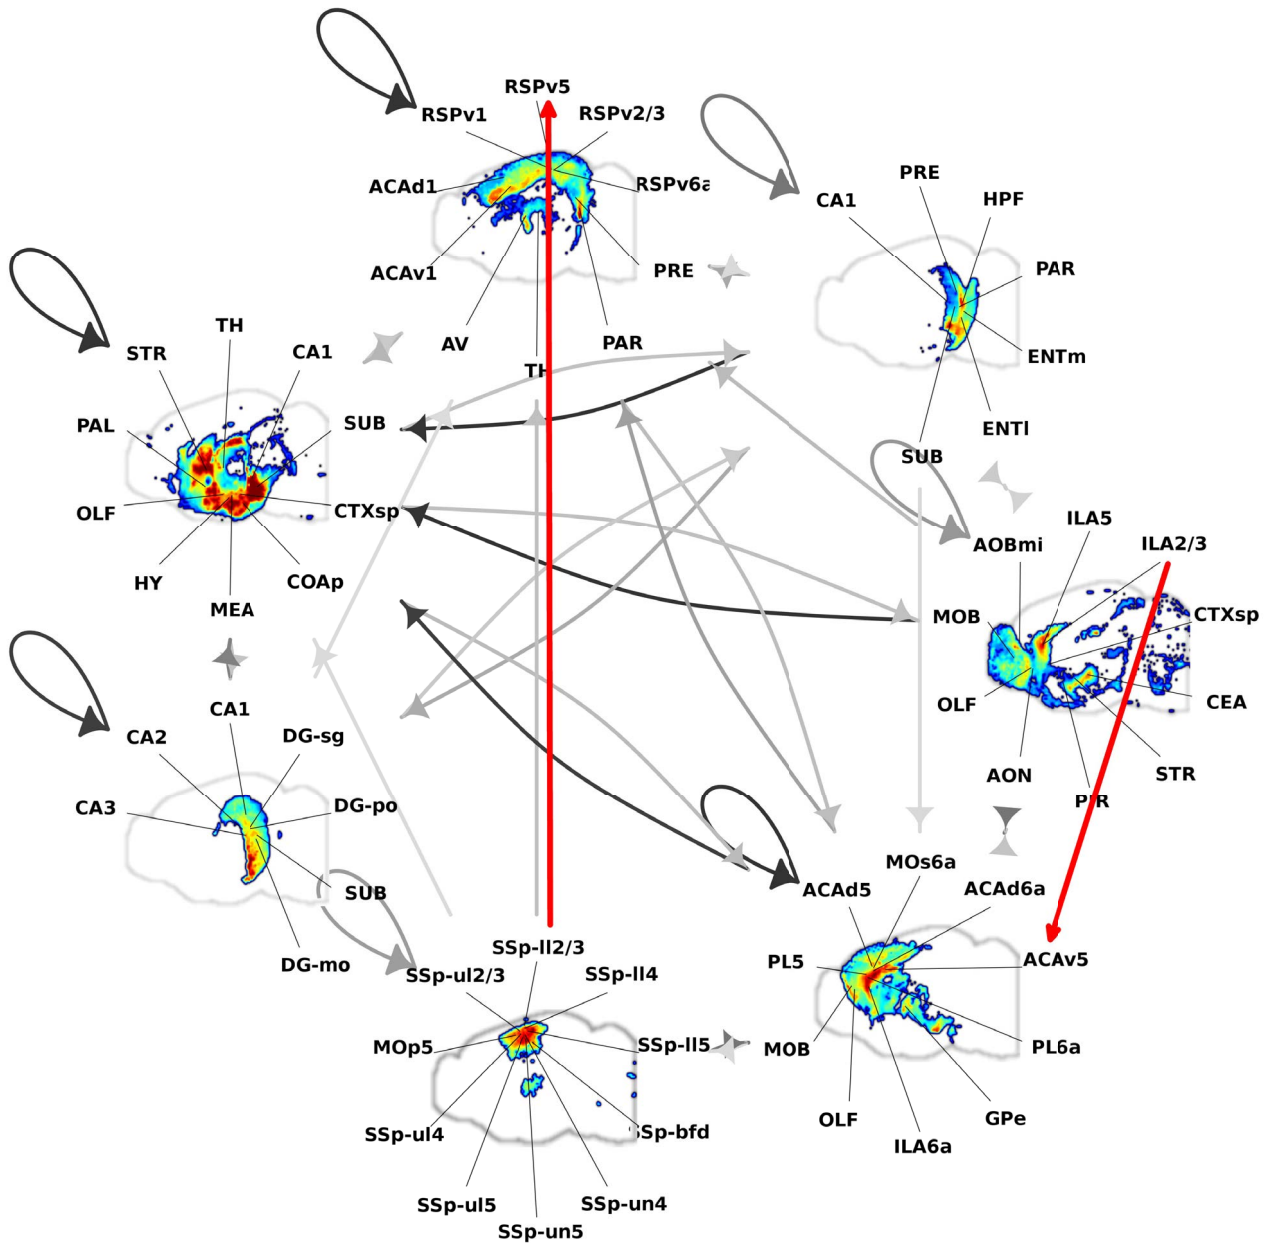

E

**Supplementary Data 3 Case 28. Synaptic function and structure gene-set of the autism-QTLs.** (A) Slice-view of first order network measures given as  $-\log_{10}$  scaled p-values. (B) Slice-view of second order network measures (incoming node strength) given as  $-\log_{10}$  scaled p-values. (C) Slice-view of second order network measures (outgoing node strength) given as  $-\log_{10}$  scaled p-values. (D) Heatmap of average log-scaled p-values of first and second order effects as well as single gene effects. (E) Clustered network graph. Clusters of significant brain regions (FDR=0.05) with similar connectivity and their structural connectivity (normalized by the injection volume) given as grey-scale arrows. Red arrows mark selected connections, discussed in the main text.



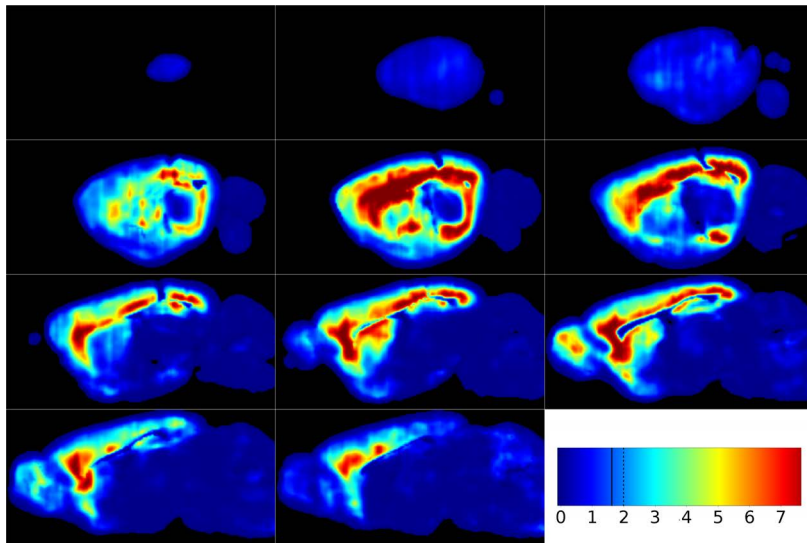

A

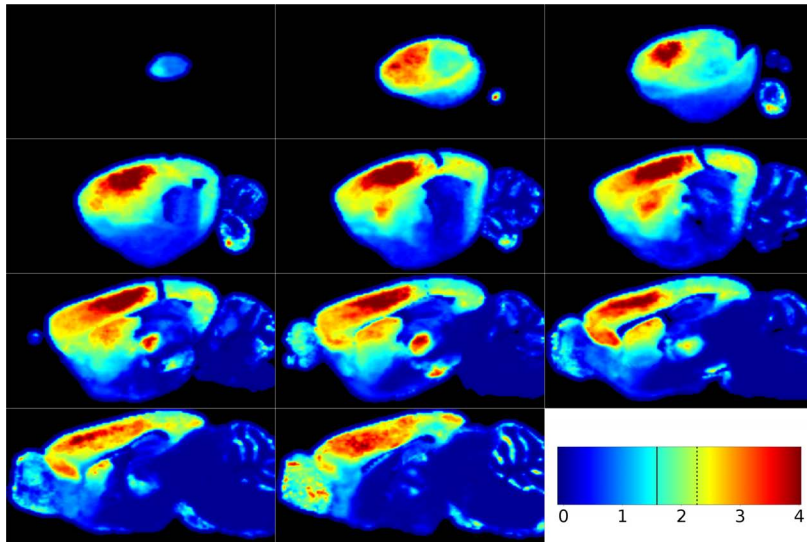

B

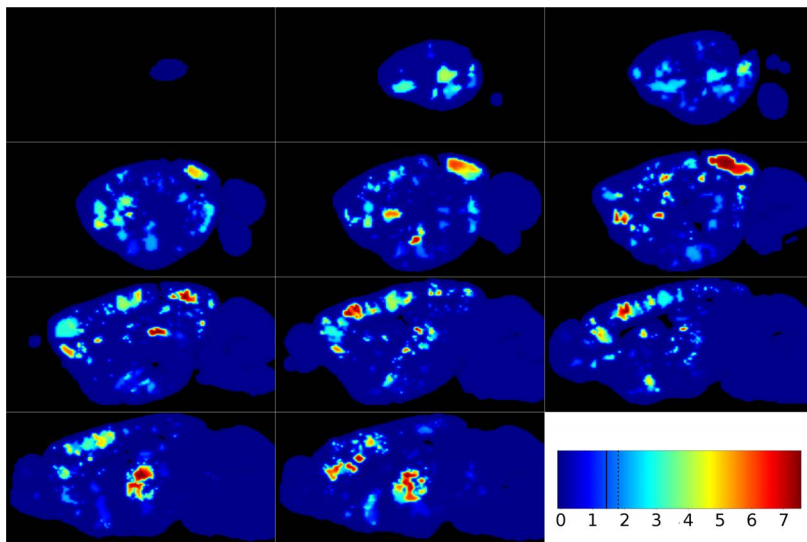

C

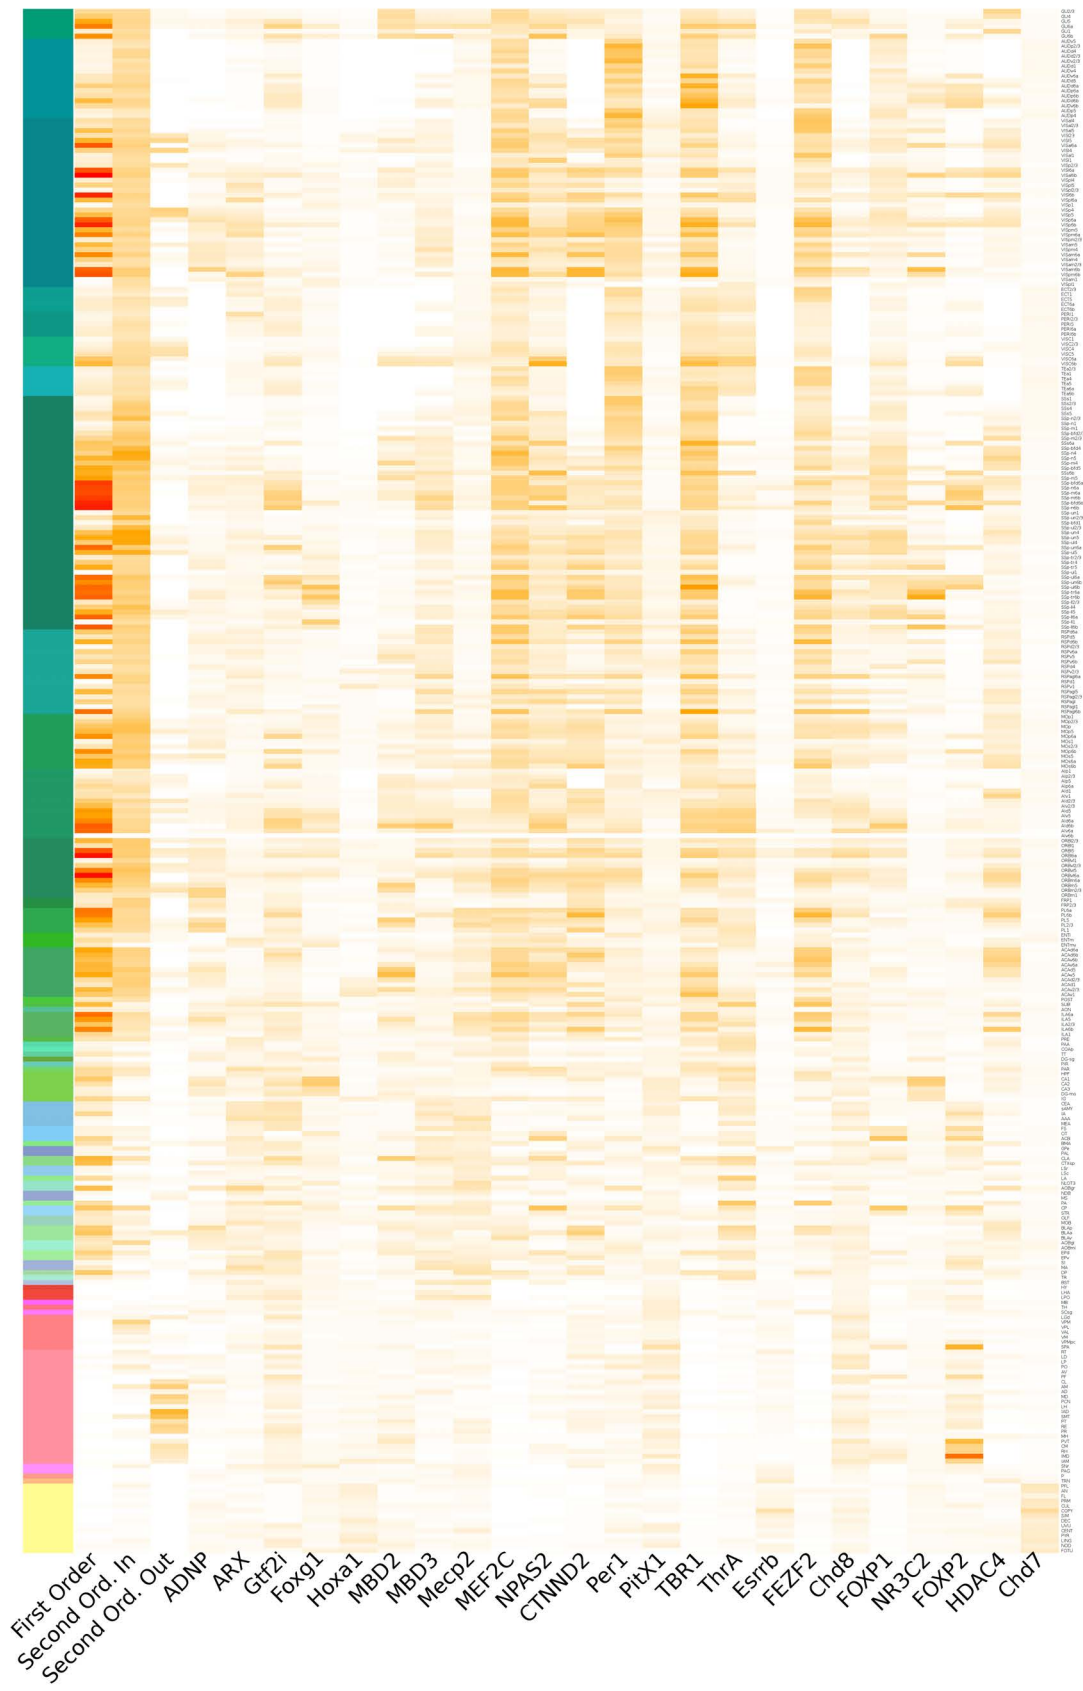

D

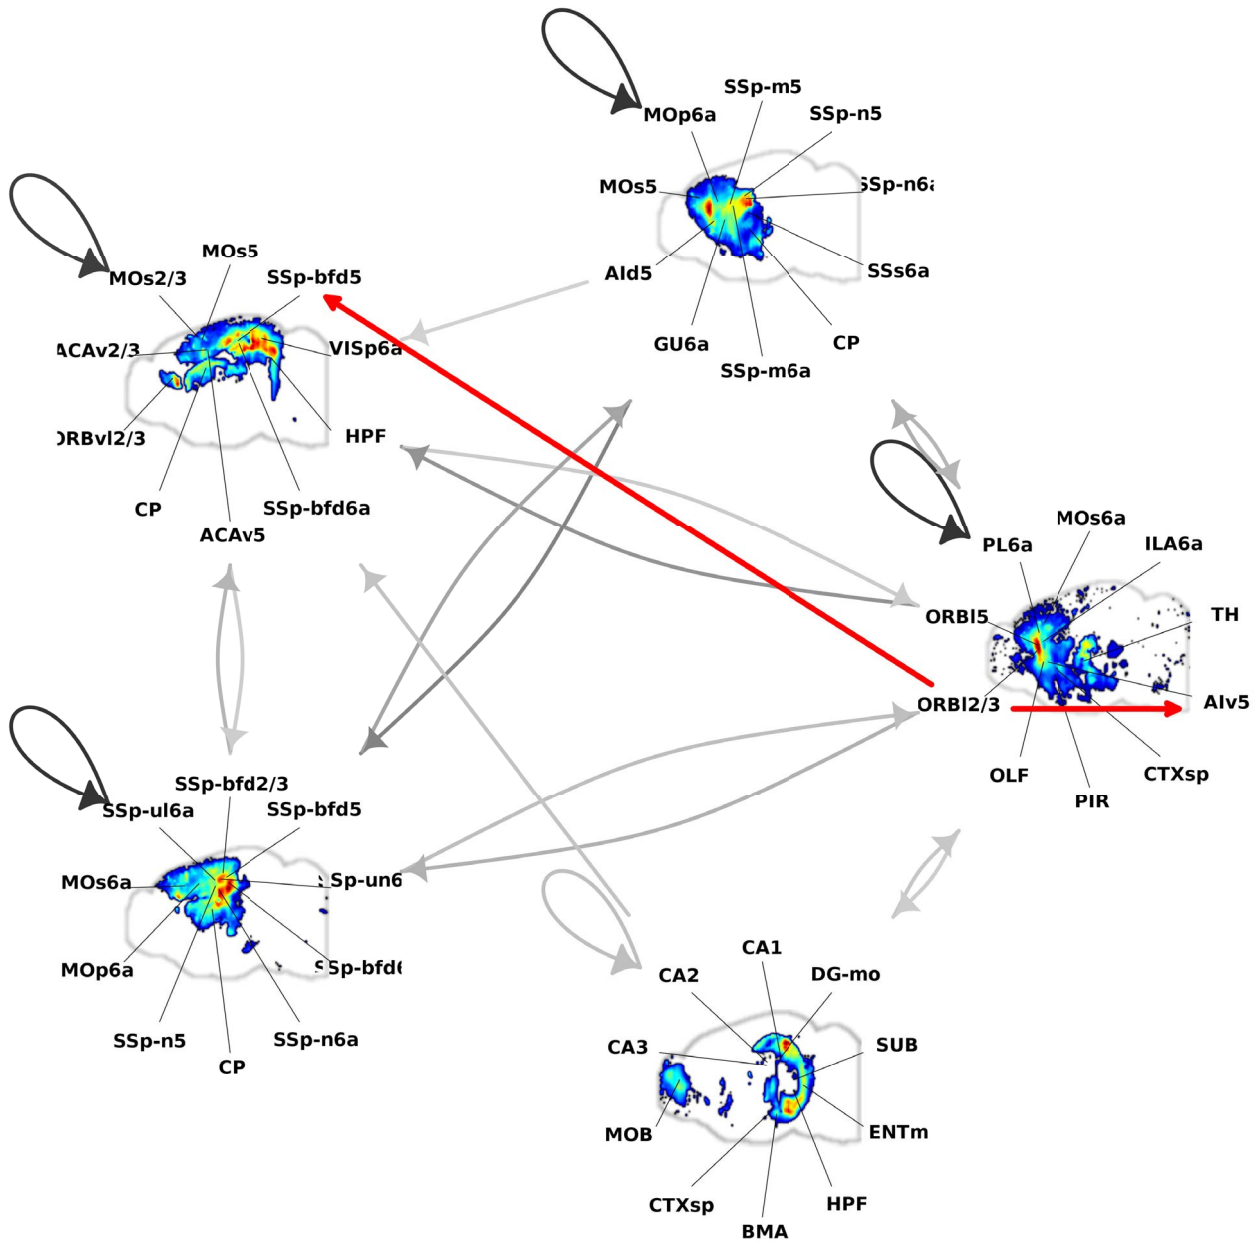

E

**Supplementary Data 3 Case 29. Transcriptional control gene-set of the autism-QTLs.** (A) Slice-view of first order network measures given as  $-\log_{10}$  scaled p-values. (B) Slice-view of second order network measures (incoming node strength) given as  $-\log_{10}$  scaled p-values. (C) Slice-view of second order network measures (outgoing node strength) given as  $-\log_{10}$  scaled p-values. (D) Heatmap of average log-scaled p-values of first and second order effects as well as single gene effects. (E) Clustered network graph. Clusters of significant brain regions (FDR=0.05) with similar connectivity and their structural connectivity (normalized by the injection volume) given as grey-scale arrows. Red arrows mark selected connections, discussed in the main text.

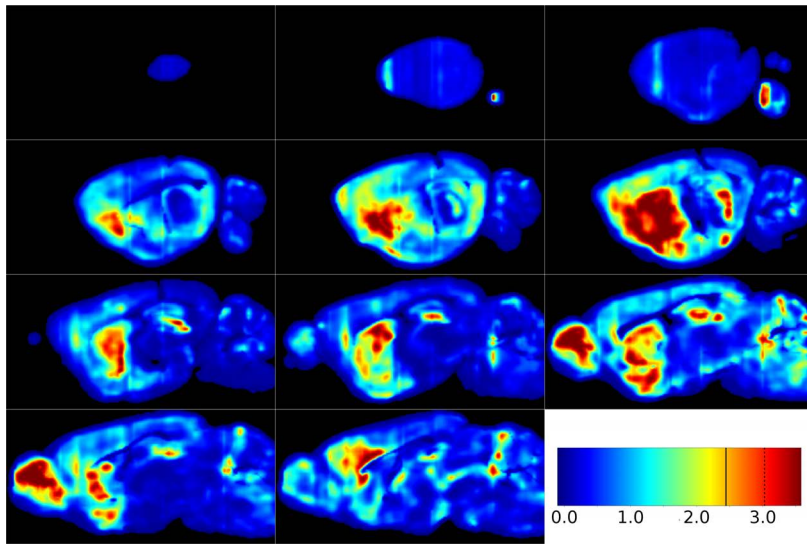

A

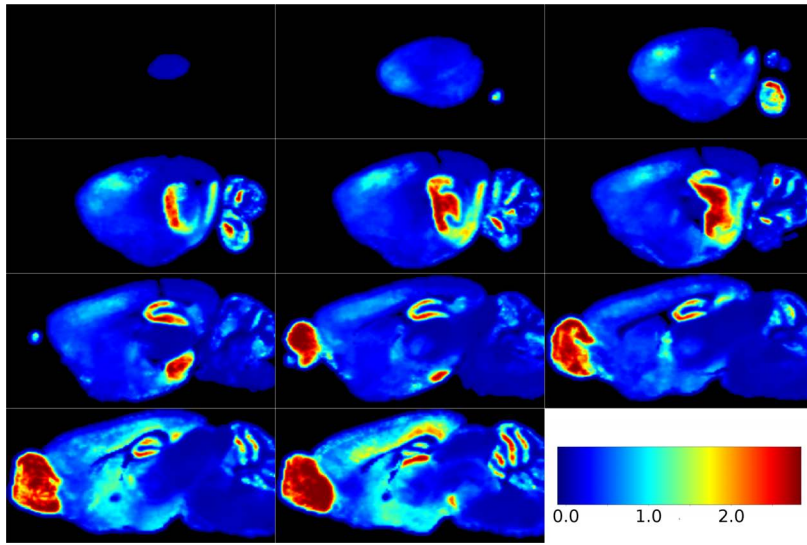

B

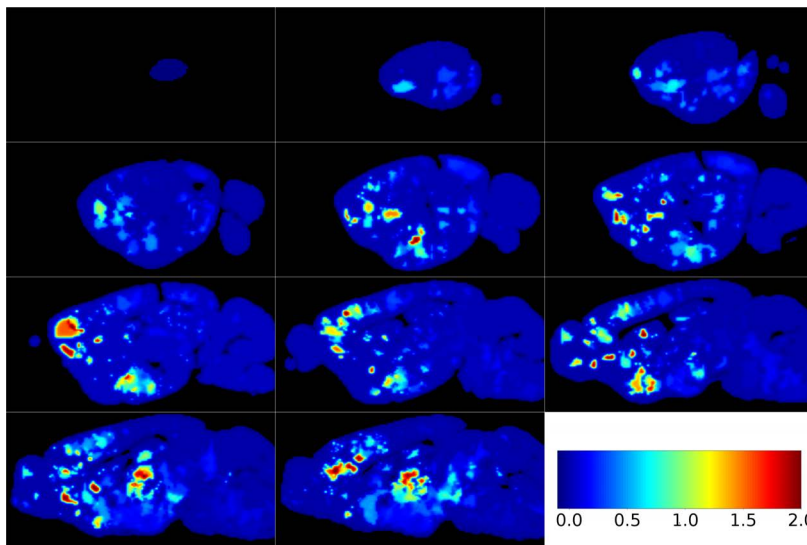

C

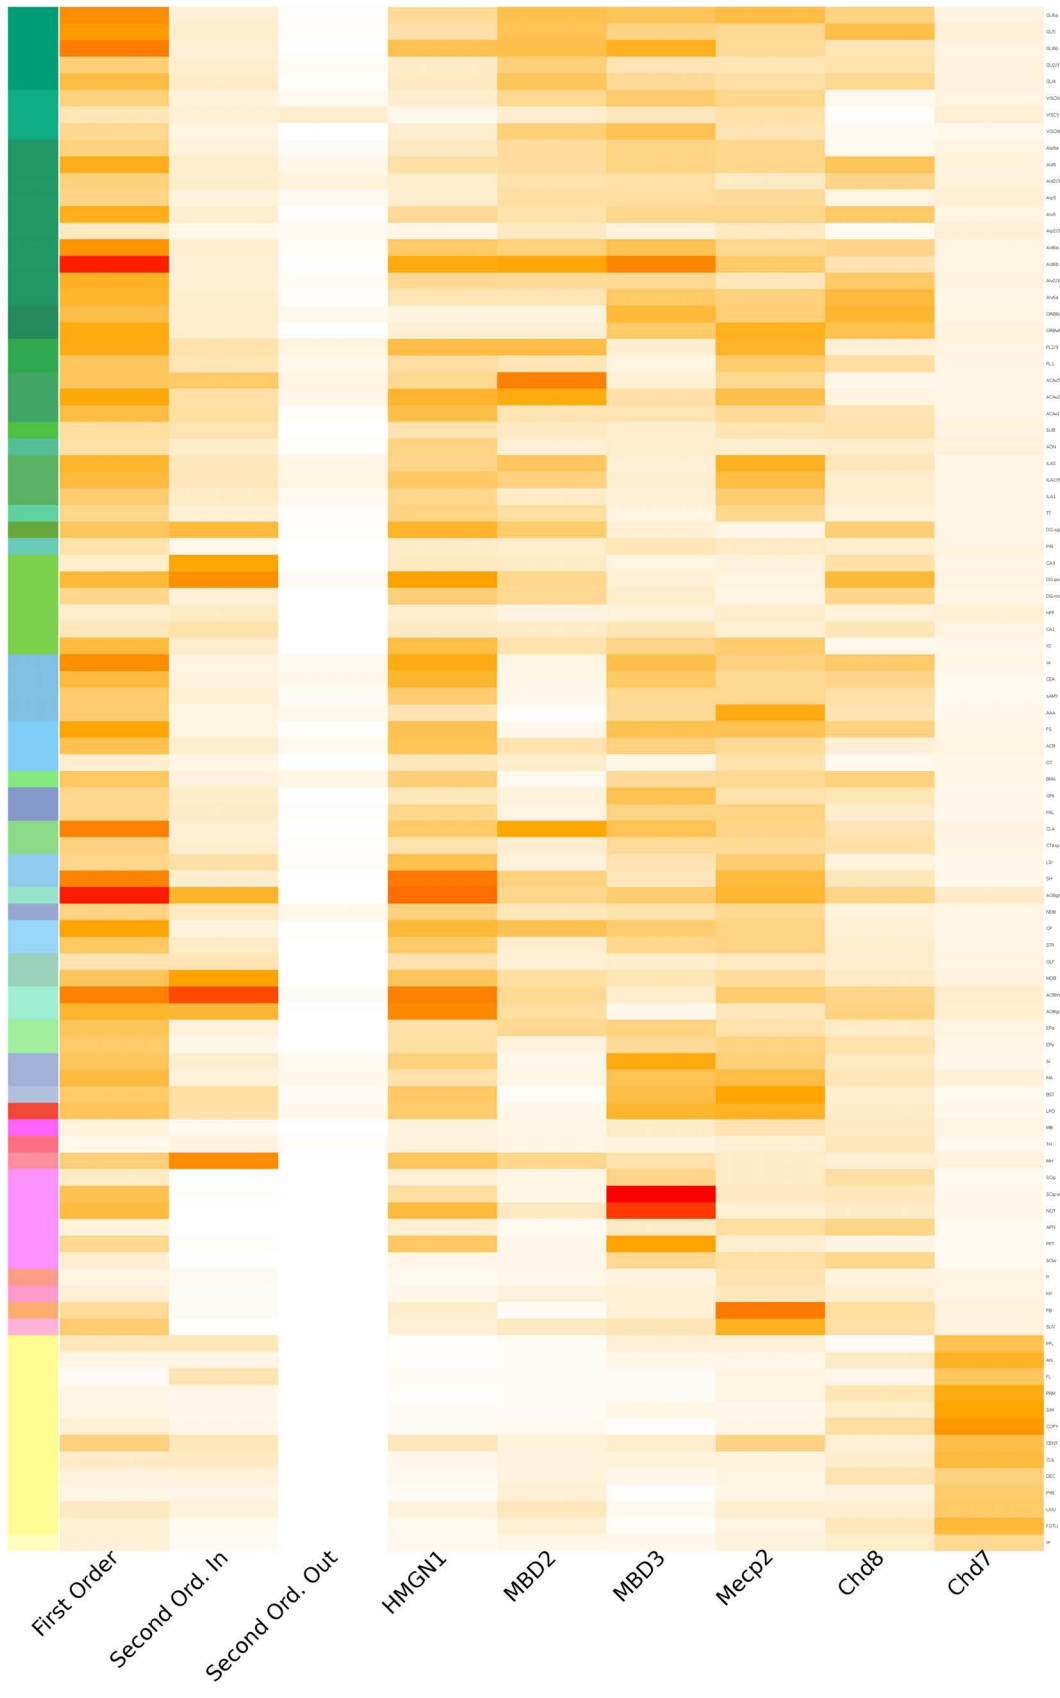

D



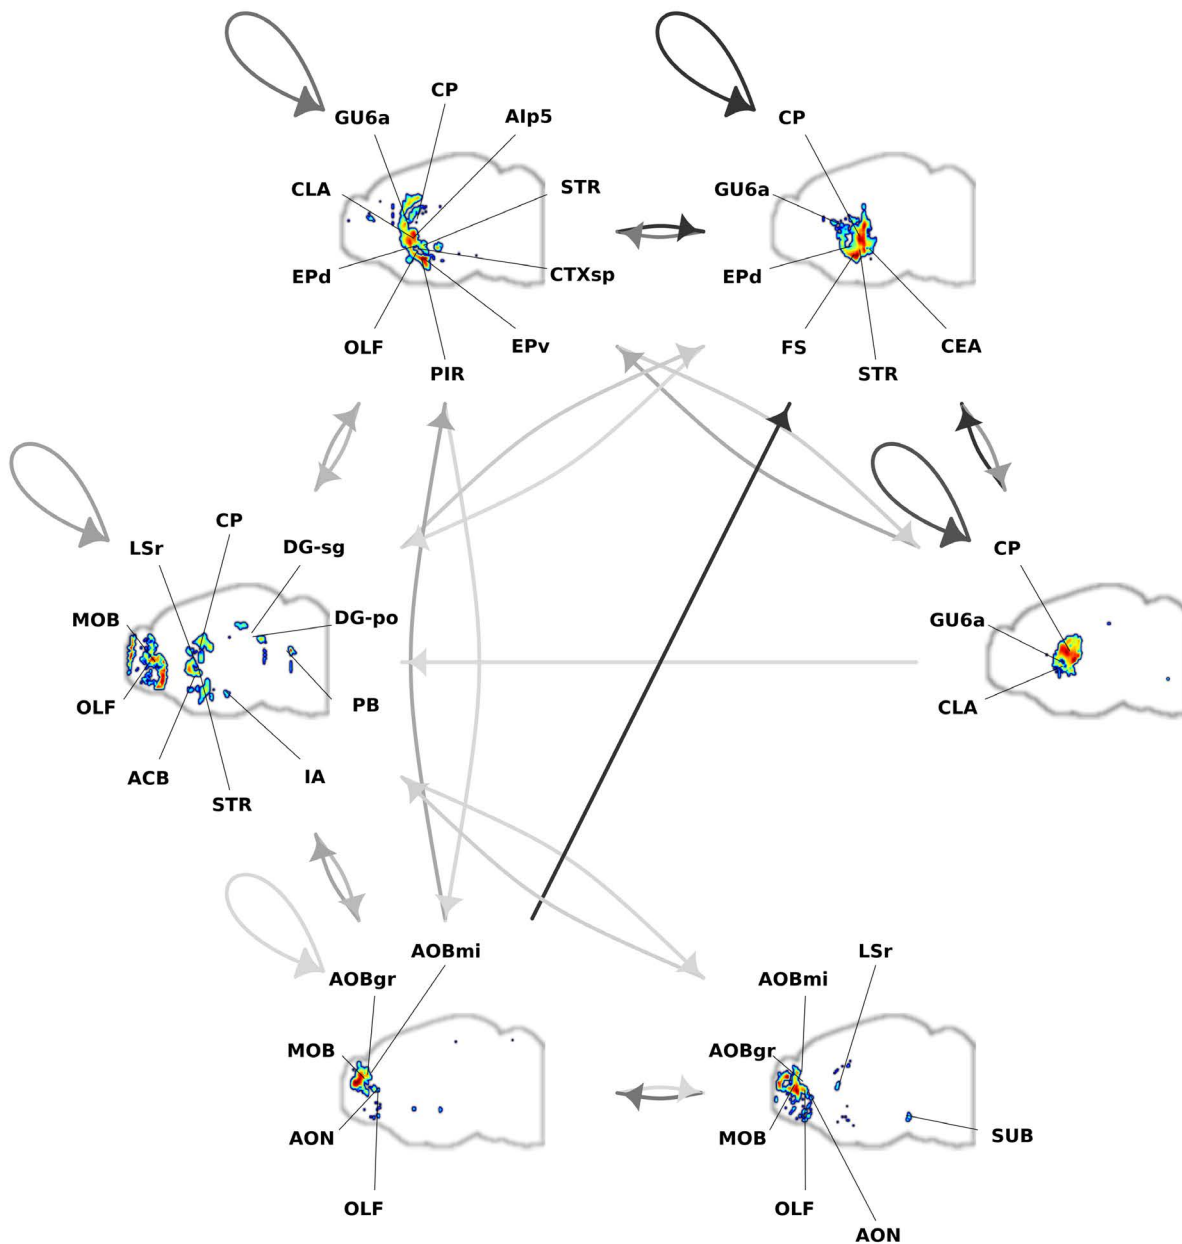

E

**Supplementary Data 3 Case 30. Chromatin remodeling gene-set of the autism-QTLs.** (A) Slice-view of first order network measures given as  $-\log_{10}$  scaled p-values. (B) Slice-view of second order network measures (incoming node strength) given as  $-\log_{10}$  scaled p-values. (C) Slice-view of second order network measures (outgoing node strength) given as  $-\log_{10}$  scaled p-values. (D) Heatmap of average log-scaled p-values of first and second order effects as well as single gene effects. (E) Clustered network graph. Clusters of significant brain regions (FDR=0.05) with similar connectivity and their structural connectivity (normalized by the injection volume) given as grey-scale arrows.
